# Supplementary material
Source: publisher figshare collection journal article supplement (https://springernature.figshare.com/ndownloader/files/12384068)
Supplement: Supplementary file 1 [file 12384068]

## Sheet: bird_latest.csv
Order	Family	Genus	Species	Subspecies	Genus_Species	Sex	Sample size	Brain Volume (ml)	Method	Brain mass (g)	Body mass (g)	Specimen ID	Museum	Date (mm-dd-yyyy)	Locality	Coordinate	Age Class	Reference	Remark
Accipitriformes	Accipitridae	Accipiter	cirrocephalus		Accipiter_cirrocephalus	f	1	2.5	Vol		202.7	MV B16071	Museum Victoria				unknown	This study (Andrew Iwaniuk unpublished data)
Accipitriformes	Accipitridae	Accipiter	cirrocephalus		Accipiter_cirrocephalus	f	1	2.4	Vol		203.9	MV B20243	Museum Victoria				unknown	This study (Andrew Iwaniuk unpublished data)
Accipitriformes	Accipitridae	Accipiter	cirrocephalus		Accipiter_cirrocephalus	f	1	2.6	Vol		200.5	MVW9876					unknown	This study (Andrew Iwaniuk unpublished data)
Accipitriformes	Accipitridae	Accipiter	cirrocephalus		Accipiter_cirrocephalus	m	1	2.2	Vol		137.5	MVW6745					unknown	This study (Andrew Iwaniuk unpublished data)
Accipitriformes	Accipitridae	Accipiter	cooperii		Accipiter_cooperii	f	1	5.2	Vol		414	USNM621364	National Museum of Natural History				unknown	This study (Andrew Iwaniuk unpublished data)
Accipitriformes	Accipitridae	Accipiter	cooperii		Accipiter_cooperii	f	1	3.8	Vol		334	PMA 72.102.33	Royal Alberta Museum				unknown	This study (Andrew Iwaniuk unpublished data)
Accipitriformes	Accipitridae	Accipiter	cooperii		Accipiter_cooperii	f	1	4	Vol		323.2	PMA 81.8.16	Royal Alberta Museum				unknown	This study (Andrew Iwaniuk unpublished data)
Accipitriformes	Accipitridae	Accipiter	cooperii		Accipiter_cooperii	m	1	4.8	Vol		309	USNM501627	National Museum of Natural History				unknown	This study (Andrew Iwaniuk unpublished data)
Accipitriformes	Accipitridae	Accipiter	cooperii		Accipiter_cooperii	m	1	4	Vol		269.6	PMA 90.45.18	Royal Alberta Museum				unknown	This study (Andrew Iwaniuk unpublished data)
Accipitriformes	Accipitridae	Accipiter	fasciatus		Accipiter_fasciatus	f	1	4.7	Vol		480	ANWC22753	Australian National Wildlife Collection				unknown	This study (Andrew Iwaniuk unpublished data)
Accipitriformes	Accipitridae	Accipiter	fasciatus		Accipiter_fasciatus	m	1	4.6	Vol		325	MV B19842	Museum Victoria				unknown	This study (Andrew Iwaniuk unpublished data)
Accipitriformes	Accipitridae	Accipiter	fasciatus		Accipiter_fasciatus	unknown	1	4.5	Vol		499.3	MV B13091	Museum Victoria				unknown	This study (Andrew Iwaniuk unpublished data)
Accipitriformes	Accipitridae	Accipiter	gentilis	gentilis	Accipiter_gentilis	f	1		Mass	7.575	1165	HoBR181347	House of Bird Research collection	5-15-1985	Åbenrå, DK	55.03N 09.25E	Adult	This study (Johannes Erritzøe House of Bird Research collection)
Accipitriformes	Accipitridae	Accipiter	gentilis	gentilis	Accipiter_gentilis	f	1		Mass	7.62	902.6	HoBR171617	House of Bird Research collection	8-15-1986	Skovby, DK	55.10N 09.23E	Adult	This study (Johannes Erritzøe House of Bird Research collection)
Accipitriformes	Accipitridae	Accipiter	gentilis	gentilis	Accipiter_gentilis	f	1		Mass	7.348	1040	HoBR354046	House of Bird Research collection	10-xx-2013	Funen, DK	55.20N 10.15E	Adult	This study (Johannes Erritzøe House of Bird Research collection)
Accipitriformes	Accipitridae	Accipiter	gentilis	gentilis	Accipiter_gentilis	f	1		Mass	7.8	1120	HoBR257366	House of Bird Research collection	11-xx-1987	Rødding, DK	55.22N 09.04E	Adult	This study (Johannes Erritzøe House of Bird Research collection)
Accipitriformes	Accipitridae	Accipiter	gentilis	gentilis	Accipiter_gentilis	f	1		Mass	7.9	767	HoBR257546	House of Bird Research collection	3-25-1993	near Kolding, DK,	55.29N 09.28E	Adult	This study (Johannes Erritzøe House of Bird Research collection)
Accipitriformes	Accipitridae	Accipiter	gentilis	gentilis	Accipiter_gentilis	f	1		Mass	7.58	1150	HoBR215553	House of Bird Research collection	3-23-1974	Pajhede Skov, DK	57.11N 10.10E	Adult	This study (Johannes Erritzøe House of Bird Research collection)
Accipitriformes	Accipitridae	Accipiter	gentilis	gentilis	Accipiter_gentilis	f	1		Mass	7.98	1199.5	HoBR167130	House of Bird Research collection				Adult	This study (Johannes Erritzøe House of Bird Research collection)
Accipitriformes	Accipitridae	Accipiter	gentilis	gentilis	Accipiter_gentilis	m	1		Mass	8.15	604.7	HoBR257668	House of Bird Research collection	8-5-2000	Kelstrup, DK	55.12N 09.33E	Adult	This study (Johannes Erritzøe House of Bird Research collection)
Accipitriformes	Accipitridae	Accipiter	gentilis	gentilis	Accipiter_gentilis	m	1		Mass	7.58	809	HoBR235179	House of Bird Research collection	1-27-1988	Vamdrup, DK	55.25N 09.17E	Adult	This study (Johannes Erritzøe House of Bird Research collection)
Accipitriformes	Accipitridae	Accipiter	gentilis	gentilis	Accipiter_gentilis	m	1		Mass	7.88	561	HoBR216056	House of Bird Research collection	9-5-1993	Kolding, DK,	55.29N 09.28E	Adult	This study (Johannes Erritzøe House of Bird Research collection)
Accipitriformes	Accipitridae	Accipiter	gentilis	gentilis	Accipiter_gentilis	m	1		Mass	8.03	848.5	HoBR215623	House of Bird Research collection				Adult	This study (Johannes Erritzøe House of Bird Research collection)
Accipitriformes	Accipitridae	Accipiter	gentilis	gentilis	Accipiter_gentilis	m	1		Mass	7.12	545.5	HoBR215651	House of Bird Research collection				Adult	This study (Johannes Erritzøe House of Bird Research collection)
Accipitriformes	Accipitridae	Accipiter	gentilis	gentilis	Accipiter_gentilis	m	1		Mass	6.951	701	HoBR314311	House of Bird Research collection	1989			Adult	This study (Johannes Erritzøe House of Bird Research collection)
Accipitriformes	Accipitridae	Accipiter	gentilis		Accipiter_gentilis	f	1	7.9	Vol		1105.9	PMA 78.3.12	Royal Alberta Museum				unknown	This study (Andrew Iwaniuk unpublished data)
Accipitriformes	Accipitridae	Accipiter	gentilis		Accipiter_gentilis	f	1	8.1	Vol		1092.2	PMA 83.26.28	Royal Alberta Museum				unknown	This study (Andrew Iwaniuk unpublished data)
Accipitriformes	Accipitridae	Accipiter	gentilis		Accipiter_gentilis	f	1	8.15	Vol		1128.5	PMA 83.62.19	Royal Alberta Museum				unknown	This study (Andrew Iwaniuk unpublished data)
Accipitriformes	Accipitridae	Accipiter	gentilis		Accipiter_gentilis	f	1	8.3	Vol		1123	PMA 83.62.23	Royal Alberta Museum				unknown	This study (Andrew Iwaniuk unpublished data)
Accipitriformes	Accipitridae	Accipiter	gentilis		Accipiter_gentilis	f	1	8.15	Vol		1017.3	PMA 83.62.32	Royal Alberta Museum				unknown	This study (Andrew Iwaniuk unpublished data)
Accipitriformes	Accipitridae	Accipiter	gentilis		Accipiter_gentilis	f	1	8	Vol		1251	PMA 84.50.27	Royal Alberta Museum				unknown	This study (Andrew Iwaniuk unpublished data)
Accipitriformes	Accipitridae	Accipiter	gentilis		Accipiter_gentilis	f	1	8	Vol		1061.8	PMA 84.50.8	Royal Alberta Museum				unknown	This study (Andrew Iwaniuk unpublished data)
Accipitriformes	Accipitridae	Accipiter	gentilis		Accipiter_gentilis	f	1	8.5	Vol		570.3	PMA 86.4.46	Royal Alberta Museum				unknown	This study (Andrew Iwaniuk unpublished data)
Accipitriformes	Accipitridae	Accipiter	gentilis		Accipiter_gentilis	f	1	7.7	Vol		665.9	PMA 87.42.29	Royal Alberta Museum				unknown	This study (Andrew Iwaniuk unpublished data)
Accipitriformes	Accipitridae	Accipiter	gentilis		Accipiter_gentilis	m	1	7.15	Vol		460.8	PMA 76.11.3	Royal Alberta Museum				unknown	This study (Andrew Iwaniuk unpublished data)
Accipitriformes	Accipitridae	Accipiter	gentilis		Accipiter_gentilis	m	1	7.7	Vol		626.8	PMA 78.3.11	Royal Alberta Museum				unknown	This study (Andrew Iwaniuk unpublished data)
Accipitriformes	Accipitridae	Accipiter	gentilis		Accipiter_gentilis	m	1	8.15	Vol		570.5	PMA 81.146.78	Royal Alberta Museum				unknown	This study (Andrew Iwaniuk unpublished data)
Accipitriformes	Accipitridae	Accipiter	gentilis		Accipiter_gentilis	m	1	8	Vol		777	PMA 81.3.61	Royal Alberta Museum				unknown	This study (Andrew Iwaniuk unpublished data)
Accipitriformes	Accipitridae	Accipiter	gentilis		Accipiter_gentilis	m	1	7.8	Vol		876	PMA 83.62.18	Royal Alberta Museum				unknown	This study (Andrew Iwaniuk unpublished data)
Accipitriformes	Accipitridae	Accipiter	gentilis		Accipiter_gentilis	m	1	7.1	Vol		491.3	PMA 83.62.20	Royal Alberta Museum				unknown	This study (Andrew Iwaniuk unpublished data)
Accipitriformes	Accipitridae	Accipiter	gentilis		Accipiter_gentilis	m	1	7.8	Vol		872	PMA 83.62.26	Royal Alberta Museum				unknown	This study (Andrew Iwaniuk unpublished data)
Accipitriformes	Accipitridae	Accipiter	gentilis		Accipiter_gentilis	m	1	7.6	Vol		845.6	PMA 83.8.28	Royal Alberta Museum				unknown	This study (Andrew Iwaniuk unpublished data)
Accipitriformes	Accipitridae	Accipiter	gentilis		Accipiter_gentilis	m	1	7.7	Vol		895	PMA 85.45.43	Royal Alberta Museum				unknown	This study (Andrew Iwaniuk unpublished data)
Accipitriformes	Accipitridae	Accipiter	gentilis		Accipiter_gentilis	m	1	7.8	Vol		801.4	PMA 85.9.52	Royal Alberta Museum				unknown	This study (Andrew Iwaniuk unpublished data)
Accipitriformes	Accipitridae	Accipiter	haplochrous		Accipiter_haplochrous	f	1	4.15	Vol		268	USNM561511	National Museum of Natural History				unknown	This study (Andrew Iwaniuk unpublished data)
Accipitriformes	Accipitridae	Accipiter	haplochrous		Accipiter_haplochrous	f	1	4.1	Vol		227	USNM561512	National Museum of Natural History				unknown	This study (Andrew Iwaniuk unpublished data)
Accipitriformes	Accipitridae	Accipiter	haplochrous		Accipiter_haplochrous	f	1	4.3	Vol		268	USNM561513	National Museum of Natural History				unknown	This study (Andrew Iwaniuk unpublished data)
Accipitriformes	Accipitridae	Accipiter	haplochrous		Accipiter_haplochrous	m	1	3.7	Vol		150	USNM561514	National Museum of Natural History				unknown	This study (Andrew Iwaniuk unpublished data)
Accipitriformes	Accipitridae	Accipiter	haplochrous		Accipiter_haplochrous	m	1	3.55	Vol		152	USNM561516	National Museum of Natural History				unknown	This study (Andrew Iwaniuk unpublished data)
Accipitriformes	Accipitridae	Accipiter	haplochrous		Accipiter_haplochrous	m	1	3.9	Vol		162	USNM561518	National Museum of Natural History				unknown	This study (Andrew Iwaniuk unpublished data)
Accipitriformes	Accipitridae	Accipiter	nisus	nisus	Accipiter_nisus	f	1		Mass	3.252	207.19	HoBR314636	House of Bird Research collection	3-20-2002	Vester Nebel, DK	53.34N 09.24E	Adult	This study (Johannes Erritzøe House of Bird Research collection)
Accipitriformes	Accipitridae	Accipiter	nisus	nisus	Accipiter_nisus	f	1		Mass	3.252	207.19	HoBR314636	House of Bird Research collection	3-20-2002	Vester Nebel, DK	53.34N 09.24E	Adult	This study (Johannes Erritzøe House of Bird Research collection)
Accipitriformes	Accipitridae	Accipiter	nisus	nisus	Accipiter_nisus	f	1		Mass	2.9	267	HoBR171998	House of Bird Research collection	2-xx-1992	Sønderborg, DK	54.55N 09.45E	Adult	This study (Johannes Erritzøe House of Bird Research collection)
Accipitriformes	Accipitridae	Accipiter	nisus	nisus	Accipiter_nisus	f	1		Mass	2.7	270.9	HoBR235745	House of Bird Research collection	8-xx-1990	Sønderborg, DK	54.55N 09.45E	Adult	This study (Johannes Erritzøe House of Bird Research collection)
Accipitriformes	Accipitridae	Accipiter	nisus	nisus	Accipiter_nisus	f	1		Mass	3.115	282.32	HoBR290898	House of Bird Research collection	3-14-1997	Sønderborg, DK	54.55N 09.45E	Adult	This study (Johannes Erritzøe House of Bird Research collection)
Accipitriformes	Accipitridae	Accipiter	nisus	nisus	Accipiter_nisus	f	1		Mass	3.11	293.5	HoBR171567	House of Bird Research collection		Åbenrå, DK	55.03N 09.25E	Adult	This study (Johannes Erritzøe House of Bird Research collection)
Accipitriformes	Accipitridae	Accipiter	nisus	nisus	Accipiter_nisus	f	1		Mass	3.212	204.36	HoBR273944	House of Bird Research collection	12-3-1995	Åbenrå, DK	55.03N 09.25E	Adult	This study (Johannes Erritzøe House of Bird Research collection)
Accipitriformes	Accipitridae	Accipiter	nisus	nisus	Accipiter_nisus	f	1		Mass	3.15	241.1	HoBR171493	House of Bird Research collection	3-3-1986	Rødekro, DK	55.04N 09.20E	Adult	This study (Johannes Erritzøe House of Bird Research collection)
Accipitriformes	Accipitridae	Accipiter	nisus	nisus	Accipiter_nisus	f	1		Mass	2.96	289.2	HoBR171436	House of Bird Research collection	1-11-1986	Nordborg, DK	55.04N 09.45E	Adult	This study (Johannes Erritzøe House of Bird Research collection)
Accipitriformes	Accipitridae	Accipiter	nisus	nisus	Accipiter_nisus	f	1		Mass	2.955	258.15	HoBR291079	House of Bird Research collection	1-30-1998	Løjt Kirkeby, DK	55.05N 09.28E	Adult	This study (Johannes Erritzøe House of Bird Research collection)
Accipitriformes	Accipitridae	Accipiter	nisus	nisus	Accipiter_nisus	f	1		Mass	3.162	295.99	HoBR328610	House of Bird Research collection	3-19-2003	Løjt Kirkeby, DK	55.05N 09.28E	Adult	This study (Johannes Erritzøe House of Bird Research collection)
Accipitriformes	Accipitridae	Accipiter	nisus	nisus	Accipiter_nisus	f	1		Mass	3.3	263.5	HoBR235785	House of Bird Research collection	12-11-1991	Østermarie, DK	55.06N 14.52E	Adult	This study (Johannes Erritzøe House of Bird Research collection)
Accipitriformes	Accipitridae	Accipiter	nisus	nisus	Accipiter_nisus	f	1		Mass	3.2	265	HoBR235465	House of Bird Research collection	1990	Hoptrup, DK	55.11N 09.27E	Adult	This study (Johannes Erritzøe House of Bird Research collection)
Accipitriformes	Accipitridae	Accipiter	nisus	nisus	Accipiter_nisus	f	1		Mass	3.15	180.9	HoBR235615	House of Bird Research collection	2-27-1991	Vojens, DK	55.15N 09.17E	Adult	This study (Johannes Erritzøe House of Bird Research collection)
Accipitriformes	Accipitridae	Accipiter	nisus	nisus	Accipiter_nisus	f	1		Mass	3.444	273.55	HoBR299865	House of Bird Research collection	2-11-2000	Vojens, DK	55.15N 09.17E	Adult	This study (Johannes Erritzøe House of Bird Research collection)
Accipitriformes	Accipitridae	Accipiter	nisus	nisus	Accipiter_nisus	f	1		Mass	3.444	273.55	HoBR299865	House of Bird Research collection	2-11-2001	Vojens, DK	55.15N 09.17E	Adult	This study (Johannes Erritzøe House of Bird Research collection)
Accipitriformes	Accipitridae	Accipiter	nisus	nisus	Accipiter_nisus	f	1		Mass	3.127	192.78	HoBR328698	House of Bird Research collection	11-16-2003	Vojens, DK	55.15N 09.17E	Adult	This study (Johannes Erritzøe House of Bird Research collection)
Accipitriformes	Accipitridae	Accipiter	nisus	nisus	Accipiter_nisus	f	1		Mass	3.15	269.5	HoBR257628	House of Bird Research collection	1-25-1993	Vojens, DK	55.15N 09.17E	Adult	This study (Johannes Erritzøe House of Bird Research collection)
Accipitriformes	Accipitridae	Accipiter	nisus	nisus	Accipiter_nisus	f	1		Mass	3.1	265.4	HoBR273765	House of Bird Research collection	1-11-1995	Haderslev, DK	55.15N 09.30E	Adult	This study (Johannes Erritzøe House of Bird Research collection)
Accipitriformes	Accipitridae	Accipiter	nisus	nisus	Accipiter_nisus	f	1		Mass	3.1	198.5	HoBR171982	House of Bird Research collection	12-xx-1991	Flovt, DK	55.15N 09.40E	Adult	This study (Johannes Erritzøe House of Bird Research collection)
Accipitriformes	Accipitridae	Accipiter	nisus	nisus	Accipiter_nisus	f	1		Mass	2.93	234.8	HoBR167111	House of Bird Research collection	3-30-1985	Haderslev, DK	55.16N 09.30E	Adult	This study (Johannes Erritzøe House of Bird Research collection)
Accipitriformes	Accipitridae	Accipiter	nisus	nisus	Accipiter_nisus	f	1		Mass	3.2	213.8	HoBR235580	House of Bird Research collection	3-24-1989	Haderslev, DK	55.16N 09.30E	Adult	This study (Johannes Erritzøe House of Bird Research collection)
Accipitriformes	Accipitridae	Accipiter	nisus	nisus	Accipiter_nisus	f	1		Mass	3.2	234.9	HoBR235664	House of Bird Research collection	1991	Haderslev,DK	55.16N 09.30E	Adult	This study (Johannes Erritzøe House of Bird Research collection)
Accipitriformes	Accipitridae	Accipiter	nisus	nisus	Accipiter_nisus	f	1		Mass	3.1	194.9	HoBR216146	House of Bird Research collection	2-20-1989	Årø, DK	55.16N 09.44E	Adult	This study (Johannes Erritzøe House of Bird Research collection)
Accipitriformes	Accipitridae	Accipiter	nisus	nisus	Accipiter_nisus	f	1		Mass	3	265	HoBR215653	House of Bird Research collection		Sommersted, DK	55.18N 09.20E	Adult	This study (Johannes Erritzøe House of Bird Research collection)
Accipitriformes	Accipitridae	Accipiter	nisus	nisus	Accipiter_nisus	f	1		Mass	3.05	233.4	HoBR235766	House of Bird Research collection	11-13-1991	Errested, DK	55.18N 09.35E	Adult	This study (Johannes Erritzøe House of Bird Research collection)
Accipitriformes	Accipitridae	Accipiter	nisus	nisus	Accipiter_nisus	f	1		Mass	2.962	249.91	HoBR338087	House of Bird Research collection	4-28-2006	Fjelstrup, DK	55.20N 09.34E	Adult	This study (Johannes Erritzøe House of Bird Research collection)
Accipitriformes	Accipitridae	Accipiter	nisus	nisus	Accipiter_nisus	f	1		Mass	2.964	252.45	HoBR328805	House of Bird Research collection	5-2-2004	Christiansfeld, DK	55.21N 09.29E	Adult	This study (Johannes Erritzøe House of Bird Research collection)
Accipitriformes	Accipitridae	Accipiter	nisus	nisus	Accipiter_nisus	f	1		Mass	3.243	221.55	HoBR353434	House of Bird Research collection	3-5-2011	Christiansfeld, DK	55.21N 09.29E	Adult	This study (Johannes Erritzøe House of Bird Research collection)
Accipitriformes	Accipitridae	Accipiter	nisus	nisus	Accipiter_nisus	f	1		Mass	3	272.7	HoBR273743	House of Bird Research collection	12-1-1994	Christiansfeld, DK	55.21N 09.29E	Adult	This study (Johannes Erritzøe House of Bird Research collection)
Accipitriformes	Accipitridae	Accipiter	nisus	nisus	Accipiter_nisus	f	1		Mass	3.2	208.5	HoBR257424	House of Bird Research collection	11-23-1992	Christiansfeld, DK	55.21N 09.29E	Adult	This study (Johannes Erritzøe House of Bird Research collection)
Accipitriformes	Accipitridae	Accipiter	nisus	nisus	Accipiter_nisus	f	1		Mass	2.962	302.61	HoBR299909	House of Bird Research collection	4-14-2000	Rødding, DK	55.22N 09.04E	Adult	This study (Johannes Erritzøe House of Bird Research collection)
Accipitriformes	Accipitridae	Accipiter	nisus	nisus	Accipiter_nisus	f	1		Mass	3.113	294.05	HoBR328730	House of Bird Research collection	2-22-2004	Ødis Bramdrup. DK	55.23N 09.22E	Adult	This study (Johannes Erritzøe House of Bird Research collection)
Accipitriformes	Accipitridae	Accipiter	nisus	nisus	Accipiter_nisus	f	1		Mass	3.046	294.16	HoBR338274	House of Bird Research collection	11-27-2006	Sjølund, DK	55.24N 09.32E	Adult	This study (Johannes Erritzøe House of Bird Research collection)
Accipitriformes	Accipitridae	Accipiter	nisus	nisus	Accipiter_nisus	f	1		Mass	3.229	265.97	HoBR290957	House of Bird Research collection	10-21-1997	Taps, DK	55.24N 09.34E	Adult	This study (Johannes Erritzøe House of Bird Research collection)
Accipitriformes	Accipitridae	Accipiter	nisus	nisus	Accipiter_nisus	f	1		Mass	3.271	277.96	HoBR328912	House of Bird Research collection	12-16-2004	Taps, DK	55.24N 09.34E	Adult	This study (Johannes Erritzøe House of Bird Research collection)
Accipitriformes	Accipitridae	Accipiter	nisus	nisus	Accipiter_nisus	f	1		Mass	2.902	210.77	HoBR273805	House of Bird Research collection	3-13-1995	Slagelse, DK	55.24N 11.22E	Adult	This study (Johannes Erritzøe House of Bird Research collection)
Accipitriformes	Accipitridae	Accipiter	nisus	nisus	Accipiter_nisus	f	1		Mass	3.2	246	HoBR215546	House of Bird Research collection		Vamdrup, DK	55.25N 09.17E	Adult	This study (Johannes Erritzøe House of Bird Research collection)
Accipitriformes	Accipitridae	Accipiter	nisus	nisus	Accipiter_nisus	f	1		Mass	3.13	189.5	HoBR216121	House of Bird Research collection	2-10-1989	Vamdrup	55.25N 09.17E	Adult	This study (Johannes Erritzøe House of Bird Research collection)
Accipitriformes	Accipitridae	Accipiter	nisus	nisus	Accipiter_nisus	f	1		Mass	3.073	202	HoBR299503	House of Bird Research collection	3-20-1998	Vamdrup, DK	55.25N 09.17E	Adult	This study (Johannes Erritzøe House of Bird Research collection)
Accipitriformes	Accipitridae	Accipiter	nisus	nisus	Accipiter_nisus	f	1		Mass	3.17	250.6	HoBR171441	House of Bird Research collection	1-20-1986	Bjert, DK	55.26N 09.37E	Adult	This study (Johannes Erritzøe House of Bird Research collection)
Accipitriformes	Accipitridae	Accipiter	nisus	nisus	Accipiter_nisus	f	1		Mass	2.93	241	HoBR257314	House of Bird Research collection	3-6-1992	Hejls, DK	55.26N 09.37E	Adult	This study (Johannes Erritzøe House of Bird Research collection)
Accipitriformes	Accipitridae	Accipiter	nisus	nisus	Accipiter_nisus	f	1		Mass	3.165	224.48	HoBR346026	House of Bird Research collection	2-22-2008	Hejls, DK	55.26N 09.37E	Adult	This study (Johannes Erritzøe House of Bird Research collection)
Accipitriformes	Accipitridae	Accipiter	nisus	nisus	Accipiter_nisus	f	1		Mass	3.2	191.5	HoBR216163	House of Bird Research collection	3-7-1992	Hjarup, DK	55.27N 09.22E	Adult	This study (Johannes Erritzøe House of Bird Research collection)
Accipitriformes	Accipitridae	Accipiter	nisus	nisus	Accipiter_nisus	f	1		Mass	2.97	273.2	HoBR171502	House of Bird Research collection	3-13-1986	Vonsild, DK	55.27N09.29E	Adult	This study (Johannes Erritzøe House of Bird Research collection)
Accipitriformes	Accipitridae	Accipiter	nisus	nisus	Accipiter_nisus	f	1		Mass	3.33	322.1	HoBR314587	House of Bird Research collection	12-18-2001	Esbjerg, DK	55.28N 08.27E	Adult	This study (Johannes Erritzøe House of Bird Research collection)
Accipitriformes	Accipitridae	Accipiter	nisus	nisus	Accipiter_nisus	f	1		Mass	2.934	248.78	HoBR353886	House of Bird Research collection	4-1-2013	Esbjerg, DK	55.28N 08.27E	Adult	This study (Johannes Erritzøe House of Bird Research collection)
Accipitriformes	Accipitridae	Accipiter	nisus	nisus	Accipiter_nisus	f	1		Mass	3.099	283.76	HoBR328933	House of Bird Research collection	12-xx-2004	Esbjerg, DK	55.28N 08.27E	Adult	This study (Johannes Erritzøe House of Bird Research collection)
Accipitriformes	Accipitridae	Accipiter	nisus	nisus	Accipiter_nisus	f	1		Mass	2.965	203.16	HoBR274044	House of Bird Research collection	3-23-1996	Vejen, DK	55.28N 09.10E	Adult	This study (Johannes Erritzøe House of Bird Research collection)
Accipitriformes	Accipitridae	Accipiter	nisus	nisus	Accipiter_nisus	f	1		Mass	3.226	271.26	HoBR365642	House of Bird Research collection	12-27-2015	Sdr. Stenderup, DK	55.28N 09.37E	Adult	This study (Johannes Erritzøe House of Bird Research collection)
Accipitriformes	Accipitridae	Accipiter	nisus	nisus	Accipiter_nisus	f	1		Mass	2.78	296.6	HoBR171508	House of Bird Research collection	3-18-1986	Vejen, DK	55.28N09.10E	Adult	This study (Johannes Erritzøe House of Bird Research collection)
Accipitriformes	Accipitridae	Accipiter	nisus	nisus	Accipiter_nisus	f	1		Mass	3.14	278.5	HoBR171519	House of Bird Research collection	3-28-1986	Lunderskov, DK	55.29N 09.18E	Adult	This study (Johannes Erritzøe House of Bird Research collection)
Accipitriformes	Accipitridae	Accipiter	nisus	nisus	Accipiter_nisus	f	1		Mass	3	278	HoBR257468	House of Bird Research collection	1992	Lunderskov, DK 1	55.29N 09.18E	Adult	This study (Johannes Erritzøe House of Bird Research collection)
Accipitriformes	Accipitridae	Accipiter	nisus	nisus	Accipiter_nisus	f	1		Mass	3.43	287.1	HoBR171842	House of Bird Research collection	2-xx-1987	Kolding, DK	55.29N 09.28E	Adult	This study (Johannes Erritzøe House of Bird Research collection)
Accipitriformes	Accipitridae	Accipiter	nisus	nisus	Accipiter_nisus	f	1		Mass	2.924	265.14	HoBR217675	House of Bird Research collection	5-9-1989	Kolding, DK	55.29N 09.28E	Adult	This study (Johannes Erritzøe House of Bird Research collection)
Accipitriformes	Accipitridae	Accipiter	nisus	nisus	Accipiter_nisus	f	1		Mass	3.6	287.6	HoBR235154	House of Bird Research collection	11-18-1988	Kolding, DK	55.29N 09.28E	Adult	This study (Johannes Erritzøe House of Bird Research collection)
Accipitriformes	Accipitridae	Accipiter	nisus	nisus	Accipiter_nisus	f	1		Mass	3.6	287.6	HoBR235154	House of Bird Research collection	11-18-1989	Kolding, DK	55.29N 09.28E	Adult	This study (Johannes Erritzøe House of Bird Research collection)
Accipitriformes	Accipitridae	Accipiter	nisus	nisus	Accipiter_nisus	f	1		Mass	3.25	245.5	HoBR257368	House of Bird Research collection	9-6-1992	Kolding, DK	55.29N 09.28E	Adult	This study (Johannes Erritzøe House of Bird Research collection)
Accipitriformes	Accipitridae	Accipiter	nisus	nisus	Accipiter_nisus	f	1		Mass	3.242	284.56	HoBR353688	House of Bird Research collection	4-1-2012	Kolding, DK	55.29N 09.28E	Adult	This study (Johannes Erritzøe House of Bird Research collection)
Accipitriformes	Accipitridae	Accipiter	nisus	nisus	Accipiter_nisus	f	1		Mass	3.1	256.55	HoBR353982	House of Bird Research collection	9-15-2013	Kolding, DK	55.29N 09.28E	Adult	This study (Johannes Erritzøe House of Bird Research collection)
Accipitriformes	Accipitridae	Accipiter	nisus	nisus	Accipiter_nisus	f	1		Mass	3.199	254.61	HoBR290776	House of Bird Research collection	12-4-1996	Kolding, DK,	55.29N 09.28E	Adult	This study (Johannes Erritzøe House of Bird Research collection)
Accipitriformes	Accipitridae	Accipiter	nisus	nisus	Accipiter_nisus	f	1		Mass	2.841	281.6	HoBR328746	House of Bird Research collection	3-16-2004	Kolding, DK	55.29N 09.28E	Adult	This study (Johannes Erritzøe House of Bird Research collection)
Accipitriformes	Accipitridae	Accipiter	nisus	nisus	Accipiter_nisus	f	1		Mass	3.012	276.29	HoBR290961	House of Bird Research collection	9-xx-1995	Bramdrupdam, DK, 1	55.32N 09.18E	Adult	This study (Johannes Erritzøe House of Bird Research collection)
Accipitriformes	Accipitridae	Accipiter	nisus	nisus	Accipiter_nisus	f	1		Mass	3.07	248.1	HoBR216088	House of Bird Research collection	1-3-1988	Jordrup, DK	55.33N 09.19E	Adult	This study (Johannes Erritzøe House of Bird Research collection)
Accipitriformes	Accipitridae	Accipiter	nisus	nisus	Accipiter_nisus	f	1		Mass	3.1	264	HoBR171991	House of Bird Research collection	3-7-1992	Fredericia, DK	55.35N 09.46E	Adult	This study (Johannes Erritzøe House of Bird Research collection)
Accipitriformes	Accipitridae	Accipiter	nisus	nisus	Accipiter_nisus	f	1		Mass	3.15	216.2	HoBR215801	House of Bird Research collection	3-15-1988	Egtved, DK	55.37E 09.19E	Adult	This study (Johannes Erritzøe House of Bird Research collection)
Accipitriformes	Accipitridae	Accipiter	nisus	nisus	Accipiter_nisus	f	1		Mass	3.225	261	HoBR299651	House of Bird Research collection	2-8-1999	Varde, DK	55.37N 08.29E	Adult	This study (Johannes Erritzøe House of Bird Research collection)
Accipitriformes	Accipitridae	Accipiter	nisus	nisus	Accipiter_nisus	f	1		Mass	3.17	208.7	HoBR171723	House of Bird Research collection	12-14-1986	Egtved, DK	55.37N 09.19E	Adult	This study (Johannes Erritzøe House of Bird Research collection)
Accipitriformes	Accipitridae	Accipiter	nisus	nisus	Accipiter_nisus	f	1		Mass	3.088	287.66	HoBR189053	House of Bird Research collection	5-1-1985	Pandrup, DK	57.13N 09.41E	Adult	This study (Johannes Erritzøe House of Bird Research collection)
Accipitriformes	Accipitridae	Accipiter	nisus	nisus	Accipiter_nisus	f	1		Mass	3.019	238.75	HoBR246102	House of Bird Research collection	8-5-1992	Sæby, DK	57.20N 10.31E	Adult	This study (Johannes Erritzøe House of Bird Research collection)
Accipitriformes	Accipitridae	Accipiter	nisus	nisus	Accipiter_nisus	f	1		Mass	2.937	196.11	HoBR189362	House of Bird Research collection	10-xx-1985	Sindal, DK	57.29N 10.12E	Adult	This study (Johannes Erritzøe House of Bird Research collection)
Accipitriformes	Accipitridae	Accipiter	nisus	nisus	Accipiter_nisus	f	1		Mass	3.077	183.76	HoBR286427	House of Bird Research collection	2-xx-1998	Tolne, DK	57.29N 10.19E	Adult	This study (Johannes Erritzøe House of Bird Research collection)
Accipitriformes	Accipitridae	Accipiter	nisus	nisus	Accipiter_nisus	f	1		Mass	2.89	332.4	HoBR171521	House of Bird Research collection				Adult	This study (Johannes Erritzøe House of Bird Research collection)
Accipitriformes	Accipitridae	Accipiter	nisus	nisus	Accipiter_nisus	f	1		Mass	3.14	268.5	HoBR171627	House of Bird Research collection				Adult	This study (Johannes Erritzøe House of Bird Research collection)
Accipitriformes	Accipitridae	Accipiter	nisus	nisus	Accipiter_nisus	f	1		Mass	2.77	252.1	HoBR171797	House of Bird Research collection				Adult	This study (Johannes Erritzøe House of Bird Research collection)
Accipitriformes	Accipitridae	Accipiter	nisus	nisus	Accipiter_nisus	f	1		Mass	2.85	202.9	HoBR171861	House of Bird Research collection				Adult	This study (Johannes Erritzøe House of Bird Research collection)
Accipitriformes	Accipitridae	Accipiter	nisus	nisus	Accipiter_nisus	f	1		Mass	3.43	291.6	HoBR204473	House of Bird Research collection				Adult	This study (Johannes Erritzøe House of Bird Research collection)
Accipitriformes	Accipitridae	Accipiter	nisus	nisus	Accipiter_nisus	f	1		Mass	2.76	250.2	HoBR215550	House of Bird Research collection				Adult	This study (Johannes Erritzøe House of Bird Research collection)
Accipitriformes	Accipitridae	Accipiter	nisus	nisus	Accipiter_nisus	f	1		Mass	3.57	262	HoBR235212	House of Bird Research collection				Adult	This study (Johannes Erritzøe House of Bird Research collection)
Accipitriformes	Accipitridae	Accipiter	nisus	nisus	Accipiter_nisus	m	1		Mass	2.72	119.9	HoBR235218	House of Bird Research collection	5-4-1989	Toreby, DK	54.45N 11.50E	Adult	This study (Johannes Erritzøe House of Bird Research collection)
Accipitriformes	Accipitridae	Accipiter	nisus	nisus	Accipiter_nisus	m	1		Mass	2.456	129.93	HoBR299543	House of Bird Research collection	11-1-1997	Nykøbing F., DK	54.46N 11.53E	Adult	This study (Johannes Erritzøe House of Bird Research collection)
Accipitriformes	Accipitridae	Accipiter	nisus	nisus	Accipiter_nisus	m	1		Mass	2.548	148.66	HoBR314308	House of Bird Research collection	5-3-2000	Padborg, DK	54.48N 09.20E	Adult	This study (Johannes Erritzøe House of Bird Research collection)
Accipitriformes	Accipitridae	Accipiter	nisus	nisus	Accipiter_nisus	m	1		Mass	2.75	137.8	HoBR167090	House of Bird Research collection	3-3-1985	Egernsund, DK	54.54N 09.36E	Adult	This study (Johannes Erritzøe House of Bird Research collection)
Accipitriformes	Accipitridae	Accipiter	nisus	nisus	Accipiter_nisus	m	1		Mass	2.8	146.7	HoBR235784	House of Bird Research collection	12-8-1991	Tinglev, DK	54.55N 09.14E	Adult	This study (Johannes Erritzøe House of Bird Research collection)
Accipitriformes	Accipitridae	Accipiter	nisus	nisus	Accipiter_nisus	m	1		Mass	2.61	135.88	HoBR345997	House of Bird Research collection	3-11-2009	Sønderborg, DK	54.55N 09.45E	Adult	This study (Johannes Erritzøe House of Bird Research collection)
Accipitriformes	Accipitridae	Accipiter	nisus	nisus	Accipiter_nisus	m	1		Mass	2.43	134.4	HoBR257469	House of Bird Research collection	2-7-1993	Sønderborg, DK	54.55N 09.45E	Adult	This study (Johannes Erritzøe House of Bird Research collection)
Accipitriformes	Accipitridae	Accipiter	nisus	nisus	Accipiter_nisus	m	1		Mass	2.85	154.2	HoBR273760	House of Bird Research collection	12-2-1994	Kegnæs Fyr,Sønderborg, DK,	54.55N 09.45E	Adult	This study (Johannes Erritzøe House of Bird Research collection)
Accipitriformes	Accipitridae	Accipiter	nisus	nisus	Accipiter_nisus	m	1		Mass	2.635	154.98	HoBR314562	House of Bird Research collection	1-14-2002	Tønder, DK	54.57N 08.50E	Adult	This study (Johannes Erritzøe House of Bird Research collection)
Accipitriformes	Accipitridae	Accipiter	nisus	nisus	Accipiter_nisus	m	1		Mass	2.635	154.98	HoBR314562	House of Bird Research collection	1-14-2002	Tønder, DK	54.57N 08.50E	Adult	This study (Johannes Erritzøe House of Bird Research collection)
Accipitriformes	Accipitridae	Accipiter	nisus	nisus	Accipiter_nisus	m	1		Mass	2.45	157.5	HoBR167066	House of Bird Research collection	1-29-1985	Bramdrupdam, DK	55,32N 09.18E	Adult	This study (Johannes Erritzøe House of Bird Research collection)
Accipitriformes	Accipitridae	Accipiter	nisus	nisus	Accipiter_nisus	m	1		Mass	2.458	108.12	HoBR346316	House of Bird Research collection	12-11-2008	Gentofte,DK	55,45N 12.33E	Adult	This study (Johannes Erritzøe House of Bird Research collection)
Accipitriformes	Accipitridae	Accipiter	nisus	nisus	Accipiter_nisus	m	1		Mass	2.52	130	HoBR235767	House of Bird Research collection	11-14-1991	Åbenrå, DK	55.03N 09.25E	Adult	This study (Johannes Erritzøe House of Bird Research collection)
Accipitriformes	Accipitridae	Accipiter	nisus	nisus	Accipiter_nisus	m	1		Mass	2.631	144.74	HoBR171727	House of Bird Research collection	9-xx-1986	Løgumkloster, DK	55.04N 08.58E	Adult	This study (Johannes Erritzøe House of Bird Research collection)
Accipitriformes	Accipitridae	Accipiter	nisus	nisus	Accipiter_nisus	m	1		Mass	2.5	156.2	HoBR235229	House of Bird Research collection		Over Jerstal, DK	55.12N 09.18E	Adult	This study (Johannes Erritzøe House of Bird Research collection)
Accipitriformes	Accipitridae	Accipiter	nisus	nisus	Accipiter_nisus	m	1		Mass	2.7	103.3	HoBR257798	House of Bird Research collection	4-29-1994	Haderslev, DK	55.16N 09.30E	Adult	This study (Johannes Erritzøe House of Bird Research collection)
Accipitriformes	Accipitridae	Accipiter	nisus	nisus	Accipiter_nisus	m	1		Mass	2.683	143.18	HoBR299864	House of Bird Research collection	10-26-1999	Haderslev, DK	55.16N 09.30E	Adult	This study (Johannes Erritzøe House of Bird Research collection)
Accipitriformes	Accipitridae	Accipiter	nisus	nisus	Accipiter_nisus	m	1		Mass	2.579	109.24	HoBR291080	House of Bird Research collection	1-7-1998	Gram, DK	55.17N 09.03E	Adult	This study (Johannes Erritzøe House of Bird Research collection)
Accipitriformes	Accipitridae	Accipiter	nisus	nisus	Accipiter_nisus	m	1		Mass	2.54	144.53	HoBR299524	House of Bird Research collection	5-18-1998	Christiansfeld, DK	55.21N 09.29E	Adult	This study (Johannes Erritzøe House of Bird Research collection)
Accipitriformes	Accipitridae	Accipiter	nisus	nisus	Accipiter_nisus	m	1		Mass	2.64	144.8	HoBR215625	House of Bird Research collection	1-21-1988	Jels, DK	55.22N 09.12E	Adult	This study (Johannes Erritzøe House of Bird Research collection)
Accipitriformes	Accipitridae	Accipiter	nisus	nisus	Accipiter_nisus	m	1		Mass	2.85	105.55	HoBR171360	House of Bird Research collection	10-14-1985	Sjølund, DK	55.24N 09.32E	Adult	This study (Johannes Erritzøe House of Bird Research collection)
Accipitriformes	Accipitridae	Accipiter	nisus	nisus	Accipiter_nisus	m	1		Mass	2.834	140.67	HoBR338299	House of Bird Research collection	3-17-2007	Taps, DK	55.24N 09.34E	Adult	This study (Johannes Erritzøe House of Bird Research collection)
Accipitriformes	Accipitridae	Accipiter	nisus	nisus	Accipiter_nisus	m	1		Mass	2.745	139.07	HoBR338446	House of Bird Research collection	10-1-2007	Taps, DK	55.24N 09.34E	Adult	This study (Johannes Erritzøe House of Bird Research collection)
Accipitriformes	Accipitridae	Accipiter	nisus	nisus	Accipiter_nisus	m	1		Mass	2.7	144.2	HoBR257794	House of Bird Research collection	4-22-1994	Vamdrup, DK	55.25N 09.17E	Adult	This study (Johannes Erritzøe House of Bird Research collection)
Accipitriformes	Accipitridae	Accipiter	nisus	nisus	Accipiter_nisus	m	1		Mass	2.7	148.7	HoBR257783	House of Bird Research collection	2-28-1994	Vamdrup, DK	55.25N 09.17E	Adult	This study (Johannes Erritzøe House of Bird Research collection)
Accipitriformes	Accipitridae	Accipiter	nisus	nisus	Accipiter_nisus	m	1		Mass	2.57	120.5	HoBR171422	House of Bird Research collection	1-1-1986	Ødis, DK	55.25N 09.23E	Adult	This study (Johannes Erritzøe House of Bird Research collection)
Accipitriformes	Accipitridae	Accipiter	nisus	nisus	Accipiter_nisus	m	1		Mass	2.388	146.06	HoBR328946	House of Bird Research collection	1-19-2005	Fovslet, DK	55.25N 09.28E	Adult	This study (Johannes Erritzøe House of Bird Research collection)
Accipitriformes	Accipitridae	Accipiter	nisus	nisus	Accipiter_nisus	m	1		Mass	2.69	135.2	HoBR235539	House of Bird Research collection	12-26-1990	Stenderupkoge, DK	55.27N 09.40E	Adult	This study (Johannes Erritzøe House of Bird Research collection)
Accipitriformes	Accipitridae	Accipiter	nisus	nisus	Accipiter_nisus	m	1		Mass	2.78	154	HoBR216177	House of Bird Research collection	5-5-1992	Vejen, DK	55.28N 09.10E	Adult	This study (Johannes Erritzøe House of Bird Research collection)
Accipitriformes	Accipitridae	Accipiter	nisus	nisus	Accipiter_nisus	m	1		Mass	2.606	112.57	HoBR273796	House of Bird Research collection	1-5-1995	Vejen, DK	55.28N 09.10E	Adult	This study (Johannes Erritzøe House of Bird Research collection)
Accipitriformes	Accipitridae	Accipiter	nisus	nisus	Accipiter_nisus	m	1		Mass	2.47	118.3	HoBR171484	House of Bird Research collection	1986	Kolding, DK	55.29N 09.28E	Adult	This study (Johannes Erritzøe House of Bird Research collection)
Accipitriformes	Accipitridae	Accipiter	nisus	nisus	Accipiter_nisus	m	1		Mass	2.57	140	HoBR171614	House of Bird Research collection	1986	Kolding, DK	55.29N 09.28E	Adult	This study (Johannes Erritzøe House of Bird Research collection)
Accipitriformes	Accipitridae	Accipiter	nisus	nisus	Accipiter_nisus	m	1		Mass	2.61	109.55	HoBR171833	House of Bird Research collection	2-27-1987	Kolding, DK	55.29N 09.28E	Adult	This study (Johannes Erritzøe House of Bird Research collection)
Accipitriformes	Accipitridae	Accipiter	nisus	nisus	Accipiter_nisus	m	1		Mass	2.8	106.7	HoBR235724	House of Bird Research collection	7-20-1990	Kolding, DK	55.29N 09.28E	Adult	This study (Johannes Erritzøe House of Bird Research collection)
Accipitriformes	Accipitridae	Accipiter	nisus	nisus	Accipiter_nisus	m	1		Mass	2.439	145.3	HoBR365414	House of Bird Research collection	1-25-2015	Kolding, DK	55.29N 09.28E	Adult	This study (Johannes Erritzøe House of Bird Research collection)
Accipitriformes	Accipitridae	Accipiter	nisus	nisus	Accipiter_nisus	m	1		Mass	2.807	140.13	HoBR353254	House of Bird Research collection	4-14-2010	Bramdrupdam, DK	55.32N 09.18E	Adult	This study (Johannes Erritzøe House of Bird Research collection)
Accipitriformes	Accipitridae	Accipiter	nisus	nisus	Accipiter_nisus	m	1		Mass	2.768	151.77	HoBR290786	House of Bird Research collection	12-26-1996	Bognæs, Holbæk, DK	55.44N 11.42E	Adult	This study (Johannes Erritzøe House of Bird Research collection)
Accipitriformes	Accipitridae	Accipiter	nisus	nisus	Accipiter_nisus	m	1		Mass	2.711	119.9	HoBR273793	House of Bird Research collection	1-29-1995	Sdr. Omme, DK	55.50N 08.54E	Adult	This study (Johannes Erritzøe House of Bird Research collection)
Accipitriformes	Accipitridae	Accipiter	nisus	nisus	Accipiter_nisus	m	1		Mass	2.43	158.7	HoBR167084	House of Bird Research collection	2-27-1986	Toftlund, DK		Adult	This study (Johannes Erritzøe House of Bird Research collection)
Accipitriformes	Accipitridae	Accipiter	nisus	nisus	Accipiter_nisus	m	1		Mass	2.68	126.8	HoBR216109	House of Bird Research collection				Adult	This study (Johannes Erritzøe House of Bird Research collection)
Accipitriformes	Accipitridae	Accipiter	nisus	nisus	Accipiter_nisus	m	1		Mass	2.85	159.2	HoBR235485	House of Bird Research collection				Adult	This study (Johannes Erritzøe House of Bird Research collection)
Accipitriformes	Accipitridae	Accipiter	novaehollandiae		Accipiter_novaehollandiae	f	1	5.15	Vol		820	ANWC47495	Australian National Wildlife Collection				unknown	This study (Andrew Iwaniuk unpublished data)
Accipitriformes	Accipitridae	Accipiter	novaehollandiae		Accipiter_novaehollandiae	f	1	5	Vol		699.5	MV B20155	Museum Victoria				unknown	This study (Andrew Iwaniuk unpublished data)
Accipitriformes	Accipitridae	Accipiter	novaehollandiae		Accipiter_novaehollandiae	f	1	5.4	Vol		556.7	USNM613004	National Museum of Natural History				unknown	This study (Andrew Iwaniuk unpublished data)
Accipitriformes	Accipitridae	Accipiter	novaehollandiae		Accipiter_novaehollandiae	m	1	4.3	Vol		440	ANWC47351	Australian National Wildlife Collection				unknown	This study (Andrew Iwaniuk unpublished data)
Accipitriformes	Accipitridae	Accipiter	novaehollandiae		Accipiter_novaehollandiae	m	1	4.5	Vol		446	MV B10849	Museum Victoria				unknown	This study (Andrew Iwaniuk unpublished data)
Accipitriformes	Accipitridae	Accipiter	novaehollandiae		Accipiter_novaehollandiae	m	1	4.4	Vol		386.3	MV B18401	Museum Victoria				unknown	This study (Andrew Iwaniuk unpublished data)
Accipitriformes	Accipitridae	Accipiter	striatus		Accipiter_striatus	f	1		Mass	5.7	520	CQ229			Little Mountain, Ohaio, USA		unknown	Crile G and Quiring DP (1940) Ohio J Sci 40:219-259.	Accipiter velox velox in original article. Identification should be taken with caution
Accipitriformes	Accipitridae	Accipiter	striatus		Accipiter_striatus	f	1	2.5	Vol		181.2	PMA 78.109.1	Royal Alberta Museum				unknown	This study (Andrew Iwaniuk unpublished data)
Accipitriformes	Accipitridae	Accipiter	striatus		Accipiter_striatus	f	1	2.45	Vol		163.7	PMA 78.3.18	Royal Alberta Museum				unknown	This study (Andrew Iwaniuk unpublished data)
Accipitriformes	Accipitridae	Accipiter	striatus		Accipiter_striatus	f	1	2.3	Vol		127.1	PMA 78.3.19	Royal Alberta Museum				unknown	This study (Andrew Iwaniuk unpublished data)
Accipitriformes	Accipitridae	Accipiter	striatus		Accipiter_striatus	f	1	2.35	Vol		181.2	PMA 78.43.1	Royal Alberta Museum				unknown	This study (Andrew Iwaniuk unpublished data)
Accipitriformes	Accipitridae	Accipiter	striatus		Accipiter_striatus	f	1	2.4	Vol		134	PMA 80.9.123	Royal Alberta Museum				unknown	This study (Andrew Iwaniuk unpublished data)
Accipitriformes	Accipitridae	Accipiter	striatus		Accipiter_striatus	f	1	1.8	Vol		117.3	PMA 81.146.85	Royal Alberta Museum				unknown	This study (Andrew Iwaniuk unpublished data)
Accipitriformes	Accipitridae	Accipiter	striatus		Accipiter_striatus	f	1	2.2	Vol		110.8	PMA 82.33.21	Royal Alberta Museum				unknown	This study (Andrew Iwaniuk unpublished data)
Accipitriformes	Accipitridae	Accipiter	striatus		Accipiter_striatus	f	1	2.2	Vol		161.4	PMA 83.62.33	Royal Alberta Museum				unknown	This study (Andrew Iwaniuk unpublished data)
Accipitriformes	Accipitridae	Accipiter	striatus		Accipiter_striatus	f	1	2.45	Vol		150	PMA 83.62.34	Royal Alberta Museum				unknown	This study (Andrew Iwaniuk unpublished data)
Accipitriformes	Accipitridae	Accipiter	striatus		Accipiter_striatus	f	1	2.45	Vol		128.5	PMA 83.62.38	Royal Alberta Museum				unknown	This study (Andrew Iwaniuk unpublished data)
Accipitriformes	Accipitridae	Accipiter	striatus		Accipiter_striatus	f	1	2.35	Vol		159.8	PMA 83.62.40	Royal Alberta Museum				unknown	This study (Andrew Iwaniuk unpublished data)
Accipitriformes	Accipitridae	Accipiter	striatus		Accipiter_striatus	f	1	2.3	Vol		148	PMA 83.62.41	Royal Alberta Museum				unknown	This study (Andrew Iwaniuk unpublished data)
Accipitriformes	Accipitridae	Accipiter	striatus		Accipiter_striatus	f	1	2.4	Vol		111.4	PMA 84.50.38	Royal Alberta Museum				unknown	This study (Andrew Iwaniuk unpublished data)
Accipitriformes	Accipitridae	Accipiter	striatus		Accipiter_striatus	f	1	2.15	Vol		112.9	PMA 90.45.15	Royal Alberta Museum				unknown	This study (Andrew Iwaniuk unpublished data)
Accipitriformes	Accipitridae	Accipiter	striatus		Accipiter_striatus	f	1	2.2	Vol		135.5	PMA 90.45.16	Royal Alberta Museum				unknown	This study (Andrew Iwaniuk unpublished data)
Accipitriformes	Accipitridae	Accipiter	striatus		Accipiter_striatus	m	1	2.05	Vol		79.68	USNM502619	National Museum of Natural History				unknown	This study (Andrew Iwaniuk unpublished data)
Accipitriformes	Accipitridae	Accipiter	striatus		Accipiter_striatus	m	1	2.2	Vol		106	USNM553260	National Museum of Natural History				unknown	This study (Andrew Iwaniuk unpublished data)
Accipitriformes	Accipitridae	Accipiter	striatus		Accipiter_striatus	m	1	2.1	Vol		97.8	PMA 86.59.28	Royal Alberta Museum				unknown	This study (Andrew Iwaniuk unpublished data)
Accipitriformes	Accipitridae	Aquila	audax		Aquila_audax	m	1	16.5	Vol		4000	ANWC22789	Australian National Wildlife Collection				unknown	This study (Andrew Iwaniuk unpublished data)
Accipitriformes	Accipitridae	Aquila	audax		Aquila_audax	m	1	14	Vol		2700	ANWC44850	Australian National Wildlife Collection				unknown	This study (Andrew Iwaniuk unpublished data)
Accipitriformes	Accipitridae	Aquila	chrysaetos		Aquila_chrysaetos	f	1	17.5	Vol		4455	PMA 73.31.2	Royal Alberta Museum				unknown	This study (Andrew Iwaniuk unpublished data)
Accipitriformes	Accipitridae	Aquila	chrysaetos		Aquila_chrysaetos	f	1	17.5	Vol		4831.1	PMA 79.38.3	Royal Alberta Museum				unknown	This study (Andrew Iwaniuk unpublished data)
Accipitriformes	Accipitridae	Aquila	chrysaetos		Aquila_chrysaetos	f	1	18	Vol		5179.2	PMA 79.38.5	Royal Alberta Museum				unknown	This study (Andrew Iwaniuk unpublished data)
Accipitriformes	Accipitridae	Aquila	chrysaetos		Aquila_chrysaetos	f	1	17	Vol		5022	PMA 79.45.1	Royal Alberta Museum				unknown	This study (Andrew Iwaniuk unpublished data)
Accipitriformes	Accipitridae	Aquila	chrysaetos		Aquila_chrysaetos	f	1	17.5	Vol		5102	PMA 79.45.2	Royal Alberta Museum				unknown	This study (Andrew Iwaniuk unpublished data)
Accipitriformes	Accipitridae	Aquila	chrysaetos		Aquila_chrysaetos	f	1	17	Vol		4422	PMA 79.45.4	Royal Alberta Museum				unknown	This study (Andrew Iwaniuk unpublished data)
Accipitriformes	Accipitridae	Aquila	chrysaetos		Aquila_chrysaetos	f	1	16	Vol		5302	PMA 79.45.5	Royal Alberta Museum				unknown	This study (Andrew Iwaniuk unpublished data)
Accipitriformes	Accipitridae	Aquila	chrysaetos		Aquila_chrysaetos	f	1	16.5	Vol		5930	PMA 79.48.2	Royal Alberta Museum				unknown	This study (Andrew Iwaniuk unpublished data)
Accipitriformes	Accipitridae	Aquila	chrysaetos		Aquila_chrysaetos	f	1	16	Vol		3250	PMA 80.43.3	Royal Alberta Museum				unknown	This study (Andrew Iwaniuk unpublished data)
Accipitriformes	Accipitridae	Aquila	chrysaetos		Aquila_chrysaetos	f	1	18	Vol		5600	PMA 81.146.33	Royal Alberta Museum				unknown	This study (Andrew Iwaniuk unpublished data)
Accipitriformes	Accipitridae	Aquila	chrysaetos		Aquila_chrysaetos	f	1	16.5	Vol		4200	PMA 81.146.34	Royal Alberta Museum				unknown	This study (Andrew Iwaniuk unpublished data)
Accipitriformes	Accipitridae	Aquila	chrysaetos		Aquila_chrysaetos	f	1	18.5	Vol		4859.4	PMA 83.71.4	Royal Alberta Museum				unknown	This study (Andrew Iwaniuk unpublished data)
Accipitriformes	Accipitridae	Aquila	chrysaetos		Aquila_chrysaetos	f	1	18	Vol		4064.4	PMA 84.45.10	Royal Alberta Museum				unknown	This study (Andrew Iwaniuk unpublished data)
Accipitriformes	Accipitridae	Aquila	chrysaetos		Aquila_chrysaetos	f	1	18.2	Vol		4846	PMA 84.50.35	Royal Alberta Museum				unknown	This study (Andrew Iwaniuk unpublished data)
Accipitriformes	Accipitridae	Aquila	chrysaetos		Aquila_chrysaetos	f	1	17.5	Vol		2758	PMA 86.4.12	Royal Alberta Museum				unknown	This study (Andrew Iwaniuk unpublished data)
Accipitriformes	Accipitridae	Aquila	chrysaetos		Aquila_chrysaetos	f	1	17	Vol		4748.8	PMA 86.4.24	Royal Alberta Museum				unknown	This study (Andrew Iwaniuk unpublished data)
Accipitriformes	Accipitridae	Aquila	chrysaetos		Aquila_chrysaetos	f	1	17	Vol		3629	PMA 88.33.1	Royal Alberta Museum				unknown	This study (Andrew Iwaniuk unpublished data)
Accipitriformes	Accipitridae	Aquila	chrysaetos		Aquila_chrysaetos	m	1	16	Vol		3636	PMA 73.33.3	Royal Alberta Museum				unknown	This study (Andrew Iwaniuk unpublished data)
Accipitriformes	Accipitridae	Aquila	chrysaetos		Aquila_chrysaetos	m	1	18.5	Vol		2920	PMA 79.15.31	Royal Alberta Museum				unknown	This study (Andrew Iwaniuk unpublished data)
Accipitriformes	Accipitridae	Aquila	chrysaetos		Aquila_chrysaetos	m	1	17	Vol		3669.8	PMA 79.38.1	Royal Alberta Museum				unknown	This study (Andrew Iwaniuk unpublished data)
Accipitriformes	Accipitridae	Aquila	chrysaetos		Aquila_chrysaetos	m	1	15.5	Vol		3952.8	PMA 79.38.6	Royal Alberta Museum				unknown	This study (Andrew Iwaniuk unpublished data)
Accipitriformes	Accipitridae	Aquila	chrysaetos		Aquila_chrysaetos	m	1	17	Vol		4000	PMA 80.20.4	Royal Alberta Museum				unknown	This study (Andrew Iwaniuk unpublished data)
Accipitriformes	Accipitridae	Aquila	chrysaetos		Aquila_chrysaetos	m	1	18	Vol		4750	PMA 81.146.36	Royal Alberta Museum				unknown	This study (Andrew Iwaniuk unpublished data)
Accipitriformes	Accipitridae	Aquila	chrysaetos		Aquila_chrysaetos	m	1	15.5	Vol		2383	PMA 81.31.1	Royal Alberta Museum				unknown	This study (Andrew Iwaniuk unpublished data)
Accipitriformes	Accipitridae	Aquila	chrysaetos		Aquila_chrysaetos	m	1	18	Vol		2418.4	PMA 82.33.30	Royal Alberta Museum				unknown	This study (Andrew Iwaniuk unpublished data)
Accipitriformes	Accipitridae	Aquila	chrysaetos		Aquila_chrysaetos	m	1	16	Vol		3551	PMA 83.62.120	Royal Alberta Museum				unknown	This study (Andrew Iwaniuk unpublished data)
Accipitriformes	Accipitridae	Aquila	chrysaetos		Aquila_chrysaetos	m	1	17	Vol		2611.7	PMA 83.62.48	Royal Alberta Museum				unknown	This study (Andrew Iwaniuk unpublished data)
Accipitriformes	Accipitridae	Aquila	chrysaetos		Aquila_chrysaetos	m	1	17.5	Vol		3305.5	PMA 83.62.53	Royal Alberta Museum				unknown	This study (Andrew Iwaniuk unpublished data)
Accipitriformes	Accipitridae	Aquila	chrysaetos		Aquila_chrysaetos	m	1	18	Vol		3863.6	PMA 83.62.54	Royal Alberta Museum				unknown	This study (Andrew Iwaniuk unpublished data)
Accipitriformes	Accipitridae	Aquila	chrysaetos		Aquila_chrysaetos	m	1	18.5	Vol		3742.6	PMA 83.62.56	Royal Alberta Museum				unknown	This study (Andrew Iwaniuk unpublished data)
Accipitriformes	Accipitridae	Aquila	chrysaetos		Aquila_chrysaetos	m	1	16	Vol		2158.7	PMA 83.71.1	Royal Alberta Museum				unknown	This study (Andrew Iwaniuk unpublished data)
Accipitriformes	Accipitridae	Aquila	chrysaetos		Aquila_chrysaetos	m	1	17.5	Vol		3411.1	PMA 84.12.2	Royal Alberta Museum				unknown	This study (Andrew Iwaniuk unpublished data)
Accipitriformes	Accipitridae	Aquila	chrysaetos		Aquila_chrysaetos	m	1	17.5	Vol		3905	PMA 86.4.21	Royal Alberta Museum				unknown	This study (Andrew Iwaniuk unpublished data)
Accipitriformes	Accipitridae	Aquila	chrysaetos		Aquila_chrysaetos	unknown	1		Mass	18.6	5273.1						Adult	Hrdlicka A (1905) Brain Weight in Vertebrates
Accipitriformes	Accipitridae	Aquila	rapax		Aquila_rapax	f	2		Mass	14.09	2625	CQ5, CQ22			Maji Moto Camp, Kenya		unknown	Crile G and Quiring DP (1940) Ohio J Sci 40:219-259.
Accipitriformes	Accipitridae	Aquila	rapax		Aquila_rapax	m	1		Mass	13.62	1670	CQ88			Maji Moto Camp, Kenya		unknown	Crile G and Quiring DP (1940) Ohio J Sci 40:219-259.
Accipitriformes	Accipitridae	Aquila	rapax		Aquila_rapax	m	2		Mass	13.91	2438	CQ11-12			Maji Moto Camp, Kenya		unknown	Crile G and Quiring DP (1940) Ohio J Sci 40:219-259.
Accipitriformes	Accipitridae	Aviceda	subcristata		Aviceda_subcristata	f	1	4.8	Vol		365.5	USNM620187	National Museum of Natural History				unknown	This study (Andrew Iwaniuk unpublished data)
Accipitriformes	Accipitridae	Aviceda	subcristata		Aviceda_subcristata	f	1	4.65	Vol		355	QM O27879	Queensland Museum				unknown	This study (Andrew Iwaniuk unpublished data)
Accipitriformes	Accipitridae	Aviceda	subcristata		Aviceda_subcristata	m	1	4.65	Vol		357	AMO60242	Australian Museum				unknown	This study (Andrew Iwaniuk unpublished data)
Accipitriformes	Accipitridae	Buteo	buteo	buteo	Buteo_buteo	f	1	8.4	Vol		660	USNM554270	National Museum of Natural History				unknown	This study (Andrew Iwaniuk unpublished data)
Accipitriformes	Accipitridae	Buteo	buteo	buteo	Buteo_buteo	f	1		Mass	7.757	905	HoBR353399	House of Bird Research collection	1-14-2009	Nykøbing F., DK	54.46N 11.53E	unknown	This study (Johannes Erritzøe House of Bird Research collection)
Accipitriformes	Accipitridae	Buteo	buteo	buteo	Buteo_buteo	f	1		Mass	8.04	665	HoBR353652	House of Bird Research collection	2-23-2011	Nykøbing F., DK	54.46N 11.53E	Adult	This study (Johannes Erritzøe House of Bird Research collection)
Accipitriformes	Accipitridae	Buteo	buteo	buteo	Buteo_buteo	f	1		Mass	8	1090	HoBR171533	House of Bird Research collection	4-12-1986	Kruså, DK	54.51N 09.24E	Adult	This study (Johannes Erritzøe House of Bird Research collection)
Accipitriformes	Accipitridae	Buteo	buteo	buteo	Buteo_buteo	f	1		Mass	8.224	672	HoBR328931	House of Bird Research collection	2-27-2005	Sønderskoven, DK	54.54N 09.52E	Adult	This study (Johannes Erritzøe House of Bird Research collection)
Accipitriformes	Accipitridae	Buteo	buteo	buteo	Buteo_buteo	f	1		Mass	7.05	1110	HoBR171451	House of Bird Research collection	2-6-1986	Tinglev, DK	54.55N 09.14E	Adult	This study (Johannes Erritzøe House of Bird Research collection)
Accipitriformes	Accipitridae	Buteo	buteo	buteo	Buteo_buteo	f	1		Mass	8.267	797	HoBR290810	House of Bird Research collection	2-14-1996	Bjerskov, Gråsten, DK	54.55N 09.35E	Adult	This study (Johannes Erritzøe House of Bird Research collection)
Accipitriformes	Accipitridae	Buteo	buteo	buteo	Buteo_buteo	f	1		Mass	7.58	616	HoBR235605	House of Bird Research collection	2-21-1991	Sønderborg, DK	54.55N 09.45E	Adult	This study (Johannes Erritzøe House of Bird Research collection)
Accipitriformes	Accipitridae	Buteo	buteo	buteo	Buteo_buteo	f	1		Mass	7.965	865	HoBR354107	House of Bird Research collection	1-30-2014	Tønder, DK	54.57N 08.50E	Adult	This study (Johannes Erritzøe House of Bird Research collection)
Accipitriformes	Accipitridae	Buteo	buteo	buteo	Buteo_buteo	f	1		Mass	7.982	834	HoBR314418	House of Bird Research collection	4-27-2001	Åbenrå, DK	55.03N 09.25E	Adult	This study (Johannes Erritzøe House of Bird Research collection)
Accipitriformes	Accipitridae	Buteo	buteo	buteo	Buteo_buteo	f	1		Mass	7.982	834	HoBR314418	House of Bird Research collection	4-27-2001	Åbenrå, DK	55.03N 09.25E	Adult	This study (Johannes Erritzøe House of Bird Research collection)
Accipitriformes	Accipitridae	Buteo	buteo	buteo	Buteo_buteo	f	1		Mass	7.8	933	HoBR257745	House of Bird Research collection	1-6-1994	Åbenrå, DK	55.03N 09.25E	Adult	This study (Johannes Erritzøe House of Bird Research collection)
Accipitriformes	Accipitridae	Buteo	buteo	buteo	Buteo_buteo	f	1		Mass	7.969	852.5	HoBR274048	House of Bird Research collection	4-20-1996	Rødekro, DK	55.04N 09.20E	Adult	This study (Johannes Erritzøe House of Bird Research collection)
Accipitriformes	Accipitridae	Buteo	buteo	buteo	Buteo_buteo	f	1		Mass	8.37	976	HoBR235583	House of Bird Research collection	2-5-1991	Nordborg, DK	55.04N 09.45E	Adult	This study (Johannes Erritzøe House of Bird Research collection)
Accipitriformes	Accipitridae	Buteo	buteo	buteo	Buteo_buteo	f	1		Mass	8.252	914	HoBR328952	House of Bird Research collection	3-29-2005	Toftlunf, DK	55.11N 09.04E	Adult	This study (Johannes Erritzøe House of Bird Research collection)
Accipitriformes	Accipitridae	Buteo	buteo	buteo	Buteo_buteo	f	1		Mass	7.787	559	HoBR328942	House of Bird Research collection	3-16-2005	Hoptrup, DK	55.11N 09.27E	unknown	This study (Johannes Erritzøe House of Bird Research collection)
Accipitriformes	Accipitridae	Buteo	buteo	buteo	Buteo_buteo	f	1		Mass	8.5	1080.5	HoBR257555	House of Bird Research collection	1-10-1993	Hejsager,Haderslev, DK	55.13N 09.37E	Adult	This study (Johannes Erritzøe House of Bird Research collection)
Accipitriformes	Accipitridae	Buteo	buteo	buteo	Buteo_buteo	f	1		Mass	7.38	991	HoBR166964	House of Bird Research collection	11-16-1984	Haderslev, DK	55.16N 09.30E	Adult	This study (Johannes Erritzøe House of Bird Research collection)
Accipitriformes	Accipitridae	Buteo	buteo	buteo	Buteo_buteo	f	1		Mass	7.61	627.7	HoBR171468	House of Bird Research collection	2-16-1985	Haderslev, DK	55.16N 09.30E	unknown	This study (Johannes Erritzøe House of Bird Research collection)
Accipitriformes	Accipitridae	Buteo	buteo	buteo	Buteo_buteo	f	1		Mass	7.8	764	HoBR215802	House of Bird Research collection	3-22-1988	Haderslev, DK	55.16N 09.30E	Adult	This study (Johannes Erritzøe House of Bird Research collection)
Accipitriformes	Accipitridae	Buteo	buteo	buteo	Buteo_buteo	f	1		Mass	8.77	944	HoBR235433	House of Bird Research collection	9-14-1990	Haderslev, DK	55.16N 09.30E	Adult	This study (Johannes Erritzøe House of Bird Research collection)
Accipitriformes	Accipitridae	Buteo	buteo	buteo	Buteo_buteo	f	1		Mass	8	747	HoBR235619	House of Bird Research collection	3-4-1991	Haderslev, DK	55.16N 09.30E	Adult	This study (Johannes Erritzøe House of Bird Research collection)
Accipitriformes	Accipitridae	Buteo	buteo	buteo	Buteo_buteo	f	1		Mass	7.917	859.5	HoBR Not registered	House of Bird Research collection	4-29-1995	Haderslev, DK	55.16N 09.30E	Adult	This study (Johannes Erritzøe House of Bird Research collection)
Accipitriformes	Accipitridae	Buteo	buteo	buteo	Buteo_buteo	f	1		Mass	8.242	1015	HoBR235279	House of Bird Research collection	12-7-1989	Obbekjær, Sdr. Hygum, DK	55.20N 08.59E	Adult	This study (Johannes Erritzøe House of Bird Research collection)
Accipitriformes	Accipitridae	Buteo	buteo	buteo	Buteo_buteo	f	1		Mass	7.528	709	HoBR299514	House of Bird Research collection	4-11-1998	Hjerndrup, DK	55.20N 09.25E	Adult	This study (Johannes Erritzøe House of Bird Research collection)
Accipitriformes	Accipitridae	Buteo	buteo	buteo	Buteo_buteo	f	1		Mass	7.35	777.3	HoBR167121	House of Bird Research collection	4-27-1985	Christiansfeld, DK	55.21N 09.29E	Adult	This study (Johannes Erritzøe House of Bird Research collection)
Accipitriformes	Accipitridae	Buteo	buteo	buteo	Buteo_buteo	f	1		Mass	8.09	1100	HoBR171736	House of Bird Research collection	12-26-1986	Christiansfeld, DK	55.21N 09.29E	Adult	This study (Johannes Erritzøe House of Bird Research collection)
Accipitriformes	Accipitridae	Buteo	buteo	buteo	Buteo_buteo	f	1		Mass	8.066	1143	HoBR299841	House of Bird Research collection	1-2-2000	Christiansfeld, DK	55.21N 09.29E	Adult	This study (Johannes Erritzøe House of Bird Research collection)
Accipitriformes	Accipitridae	Buteo	buteo	buteo	Buteo_buteo	f	1		Mass	7.72	813	HoBR235112	House of Bird Research collection	10-9-1989	Sjølund, DK	55.24N 09.32E	Adult	This study (Johannes Erritzøe House of Bird Research collection)
Accipitriformes	Accipitridae	Buteo	buteo	buteo	Buteo_buteo	f	1		Mass	7.951	1020	HoBR353408	House of Bird Research collection	12-11-2010	Sjølund, DK, 1	55.24N 09.32E	Adult	This study (Johannes Erritzøe House of Bird Research collection)
Accipitriformes	Accipitridae	Buteo	buteo	buteo	Buteo_buteo	f	1		Mass	8.19	1153	HoBR328947	House of Bird Research collection	3-25-2005	Ødis, DK	55.25N 09.23E	Adult	This study (Johannes Erritzøe House of Bird Research collection)
Accipitriformes	Accipitridae	Buteo	buteo	buteo	Buteo_buteo	f	1		Mass	7.97	671.6	HoBR215955	House of Bird Research collection	9-5-1988	Sdr. Bjert, DK	55.27N 09.34E	Adult	This study (Johannes Erritzøe House of Bird Research collection)
Accipitriformes	Accipitridae	Buteo	buteo	buteo	Buteo_buteo	f	1		Mass	8.133	945	HoBR274062	House of Bird Research collection	3-25-1996	Vejen, DK	55.28N 09.10E	Adult	This study (Johannes Erritzøe House of Bird Research collection)
Accipitriformes	Accipitridae	Buteo	buteo	buteo	Buteo_buteo	f	1		Mass	8.101	843	HoBR314797	House of Bird Research collection	4-3-2003	Sdr. Stenderup. DK	55.28N 09.37E	Adult	This study (Johannes Erritzøe House of Bird Research collection)
Accipitriformes	Accipitridae	Buteo	buteo	buteo	Buteo_buteo	f	1		Mass	7.42	760.5	HoBR171512	House of Bird Research collection		Vejen, DK	55.28N09.10E	unknown	This study (Johannes Erritzøe House of Bird Research collection)
Accipitriformes	Accipitridae	Buteo	buteo	buteo	Buteo_buteo	f	1		Mass	8.169	1062	HoBR328914	House of Bird Research collection	12-xx-2004	Gørding, DK	55.29N 08.48E	unknown	This study (Johannes Erritzøe House of Bird Research collection)
Accipitriformes	Accipitridae	Buteo	buteo	buteo	Buteo_buteo	f	1		Mass	7.815	517	HoBR314534	House of Bird Research collection	10-27-2001	Lunderskov, DK	55.29N 09.18E	Adult	This study (Johannes Erritzøe House of Bird Research collection)
Accipitriformes	Accipitridae	Buteo	buteo	buteo	Buteo_buteo	f	1		Mass	7.65	769.3	HoBR171337	House of Bird Research collection	3-15-1985	Kolding, DK	55.29N 09.28E	unknown	This study (Johannes Erritzøe House of Bird Research collection)
Accipitriformes	Accipitridae	Buteo	buteo	buteo	Buteo_buteo	f	1		Mass	7.22	1245	HoBR171409	House of Bird Research collection	11-xx-1985	Kolding, DK	55.29N 09.28E	Adult	This study (Johannes Erritzøe House of Bird Research collection)
Accipitriformes	Accipitridae	Buteo	buteo	buteo	Buteo_buteo	f	1		Mass	7.66	821.3	HoBR171473	House of Bird Research collection	2-20-1986	Kolding, DK	55.29N 09.28E	unknown	This study (Johannes Erritzøe House of Bird Research collection)
Accipitriformes	Accipitridae	Buteo	buteo	buteo	Buteo_buteo	f	1		Mass	8.347	740	HoBR346263	House of Bird Research collection	2-17-2009	Kolding, DK	55.29N 09.28E	unknown	This study (Johannes Erritzøe House of Bird Research collection)
Accipitriformes	Accipitridae	Buteo	buteo	buteo	Buteo_buteo	f	1		Mass	8.3	678	HoBR257470	House of Bird Research collection	2-14-1993	Fredericia, DK	55.35N 09.46E	Adult	This study (Johannes Erritzøe House of Bird Research collection)
Accipitriformes	Accipitridae	Buteo	buteo	buteo	Buteo_buteo	f	1		Mass	8.026	1100	HoBR314382	House of Bird Research collection	1-23-2001	Varde. DK	55.37N 08.29E	Adult	This study (Johannes Erritzøe House of Bird Research collection)
Accipitriformes	Accipitridae	Buteo	buteo	buteo	Buteo_buteo	f	1		Mass	8.026	1100	HoBR314382	House of Bird Research collection	1-23-2001	Varde. DK	55.37N 08.29E	Adult	This study (Johannes Erritzøe House of Bird Research collection)
Accipitriformes	Accipitridae	Buteo	buteo	buteo	Buteo_buteo	f	1		Mass	7.535	900	HoBR346063	House of Bird Research collection	3-23-2008	Kastrup, Dk	55.39N 12.39E	Adult	This study (Johannes Erritzøe House of Bird Research collection)
Accipitriformes	Accipitridae	Buteo	buteo	buteo	Buteo_buteo	f	1		Mass	7.998	960	HoBR337499	House of Bird Research collection	1-6-2006	Ravnshøj, Frederikshavn, DK	57.26N 10.31E	Adult	This study (Johannes Erritzøe House of Bird Research collection)
Accipitriformes	Accipitridae	Buteo	buteo	buteo	Buteo_buteo	f	1		Mass	8	781	HoBR166093	House of Bird Research collection				Adult	This study (Johannes Erritzøe House of Bird Research collection)
Accipitriformes	Accipitridae	Buteo	buteo	buteo	Buteo_buteo	f	1		Mass	7.73	1037.8	HoBR167051	House of Bird Research collection	1-20-1985	Skærbæk, DK		unknown	This study (Johannes Erritzøe House of Bird Research collection)
Accipitriformes	Accipitridae	Buteo	buteo	buteo	Buteo_buteo	f	1		Mass	8.26	564.2	HoBR171482	House of Bird Research collection	2-23-1986	Nordals, DK		Adult	This study (Johannes Erritzøe House of Bird Research collection)
Accipitriformes	Accipitridae	Buteo	buteo	buteo	Buteo_buteo	f	1		Mass	8.38	942	HoBR171654	House of Bird Research collection	10-2-1986			Adult	This study (Johannes Erritzøe House of Bird Research collection)
Accipitriformes	Accipitridae	Buteo	buteo	buteo	Buteo_buteo	f	1		Mass	7.29	883	HoBR215631	House of Bird Research collection				Adult	This study (Johannes Erritzøe House of Bird Research collection)
Accipitriformes	Accipitridae	Buteo	buteo	buteo	Buteo_buteo	f	1		Mass	7.8	939	HoBR215810	House of Bird Research collection	2-1-1988	Als, DK		Adult	This study (Johannes Erritzøe House of Bird Research collection)
Accipitriformes	Accipitridae	Buteo	buteo	buteo	Buteo_buteo	m	1		Mass	7.71	714	HoBR299532	House of Bird Research collection	6-11-1998	Padborg, DK	54.48N 09.20E	Adult	This study (Johannes Erritzøe House of Bird Research collection)
Accipitriformes	Accipitridae	Buteo	buteo	buteo	Buteo_buteo	m	1		Mass	7.77	746	HoBR257318	House of Bird Research collection	7-11-1992	Kollund, DK	54.49N 09.30E	Adult	This study (Johannes Erritzøe House of Bird Research collection)
Accipitriformes	Accipitridae	Buteo	buteo	buteo	Buteo_buteo	m	1		Mass	6.923	736	HoBR328870	House of Bird Research collection	9-27-2004	Rinkenæs, DK	54.54N 09.34	unknown	This study (Johannes Erritzøe House of Bird Research collection)
Accipitriformes	Accipitridae	Buteo	buteo	buteo	Buteo_buteo	m	1		Mass	7.951	599	HoBR314509	House of Bird Research collection	6-13-2001	Egernsundbroen. Als. DK	54.54N 09.37E	Adult	This study (Johannes Erritzøe House of Bird Research collection)
Accipitriformes	Accipitridae	Buteo	buteo	buteo	Buteo_buteo	m	1		Mass	7.951	599	HoBR314509	House of Bird Research collection	6-13-2001	Egernsundbroen. Als. DK	54.54N 09.37E	Adult	This study (Johannes Erritzøe House of Bird Research collection)
Accipitriformes	Accipitridae	Buteo	buteo	buteo	Buteo_buteo	m	1		Mass	8.796	787	HoBR290976	House of Bird Research collection	10-21-1997	Tinglev, DK	54.55N 09.14E	Adult	This study (Johannes Erritzøe House of Bird Research collection)
Accipitriformes	Accipitridae	Buteo	buteo	buteo	Buteo_buteo	m	1		Mass	8.45	844	HoBR216159	House of Bird Research collection	4-22-1992	Sønderborg, DK	54.55N 09.45E	Adult	This study (Johannes Erritzøe House of Bird Research collection)
Accipitriformes	Accipitridae	Buteo	buteo	buteo	Buteo_buteo	m	1		Mass	8.157	450	HoBR346390	House of Bird Research collection	1-11-2009	Sydals, DK	54.55N 09.50E	unknown	This study (Johannes Erritzøe House of Bird Research collection)
Accipitriformes	Accipitridae	Buteo	buteo	buteo	Buteo_buteo	m	1		Mass	8.308	849.5	HoBR273955	House of Bird Research collection	12-15-1995	Kliplev, DK	54.56N 09.24E	Adult	This study (Johannes Erritzøe House of Bird Research collection)
Accipitriformes	Accipitridae	Buteo	buteo	buteo	Buteo_buteo	m	1		Mass	8.38	683	HoBR257768	House of Bird Research collection	3-4-1994	Kliplev, Åbenrå, DK	54.56N 09.24E	Adult	This study (Johannes Erritzøe House of Bird Research collection)
Accipitriformes	Accipitridae	Buteo	buteo	buteo	Buteo_buteo	m	1		Mass	7.943	717	HoBR314718	House of Bird Research collection	9-xx-2002	Søgård. DK	54.56N 09.27E	unknown	This study (Johannes Erritzøe House of Bird Research collection)
Accipitriformes	Accipitridae	Buteo	buteo	buteo	Buteo_buteo	m	1		Mass	7.463	428	HoBR353545	House of Bird Research collection	1-xx-2011	Tønder, DK	54.57N 08.50E	Adult	This study (Johannes Erritzøe House of Bird Research collection)
Accipitriformes	Accipitridae	Buteo	buteo	buteo	Buteo_buteo	m	1		Mass	7.4	516.4	HoBR257513	House of Bird Research collection	4-9-1993	Fynshav, DK, 2	54.60N 10,02E	Adult	This study (Johannes Erritzøe House of Bird Research collection)
Accipitriformes	Accipitridae	Buteo	buteo	buteo	Buteo_buteo	m	1		Mass	7.6	941	HoBR257714	House of Bird Research collection	10-11-1993	Åbenrå, DK	55.03N 09.25E	unknown	This study (Johannes Erritzøe House of Bird Research collection)
Accipitriformes	Accipitridae	Buteo	buteo	buteo	Buteo_buteo	m	1		Mass	7.228	493	HoBR291023	House of Bird Research collection	12-xx-1997	Åbenrå, DK	55.03N 09.25E	unknown	This study (Johannes Erritzøe House of Bird Research collection)
Accipitriformes	Accipitridae	Buteo	buteo	buteo	Buteo_buteo	m	1		Mass	8.15	722.5	HoBR Not registered	House of Bird Research collection	1-26-1995	Åbenrå, DK	55.03N 09.25E	Adult	This study (Johannes Erritzøe House of Bird Research collection)
Accipitriformes	Accipitridae	Buteo	buteo	buteo	Buteo_buteo	m	1		Mass	7.473	741	HoBR290999	House of Bird Research collection	6-20-1997	Løgumkloster, DK	55.04N 08.58E	Adult	This study (Johannes Erritzøe House of Bird Research collection)
Accipitriformes	Accipitridae	Buteo	buteo	buteo	Buteo_buteo	m	1		Mass	8.059	573	HoBR274047	House of Bird Research collection	3-25-1996	Rødekro, DK	55.04N 09.20E	Adult	This study (Johannes Erritzøe House of Bird Research collection)
Accipitriformes	Accipitridae	Buteo	buteo	buteo	Buteo_buteo	m	1		Mass	8.706	727	HoBR338135	House of Bird Research collection	5-11-2004	Hellevad-Rødekro, DK	55.05N 09.13E	Adult	This study (Johannes Erritzøe House of Bird Research collection)
Accipitriformes	Accipitridae	Buteo	buteo	buteo	Buteo_buteo	m	1		Mass	7.61	832	HoBR215474	House of Bird Research collection		Genner, DK	55.07N 09.25E	Adult	This study (Johannes Erritzøe House of Bird Research collection)
Accipitriformes	Accipitridae	Buteo	buteo	buteo	Buteo_buteo	m	1		Mass	9	865.2	HoBR235501	House of Bird Research collection	11-21-1990	Ishøj, DK	55.09N 09.20E	Adult	This study (Johannes Erritzøe House of Bird Research collection)
Accipitriformes	Accipitridae	Buteo	buteo	buteo	Buteo_buteo	m	1		Mass	8.271	671	HoBR299512	House of Bird Research collection	3-18-1998	Skovby, DK	55.10N 09.23E	Adult	This study (Johannes Erritzøe House of Bird Research collection)
Accipitriformes	Accipitridae	Buteo	buteo	buteo	Buteo_buteo	m	1		Mass	7.106	492.5	HoBR273951	House of Bird Research collection	12-31-1995	Vojens, DK DK	55.15N 09.17E	Adult	This study (Johannes Erritzøe House of Bird Research collection)
Accipitriformes	Accipitridae	Buteo	buteo	buteo	Buteo_buteo	m	1		Mass	7.695	811	HoBR291087	House of Bird Research collection	2-18-1998	Hammelev, DK	55.15N 09.23E	unknown	This study (Johannes Erritzøe House of Bird Research collection)
Accipitriformes	Accipitridae	Buteo	buteo	buteo	Buteo_buteo	m	1		Mass	8.45	728.5	HoBR235617	House of Bird Research collection	3-1-1991	Moltrup, DK	55.16N 09.28E	Adult	This study (Johannes Erritzøe House of Bird Research collection)
Accipitriformes	Accipitridae	Buteo	buteo	buteo	Buteo_buteo	m	1		Mass	7.5	814.5	HoBR167094	House of Bird Research collection	5-8-1985	Haderslev, DK	55.16N 09.30E	unknown	This study (Johannes Erritzøe House of Bird Research collection)
Accipitriformes	Accipitridae	Buteo	buteo	buteo	Buteo_buteo	m	1		Mass	6.94	660.5	HoBR171421	House of Bird Research collection	12-26-1986	Haderslev, DK	55.16N 09.30E	unknown	This study (Johannes Erritzøe House of Bird Research collection)
Accipitriformes	Accipitridae	Buteo	buteo	buteo	Buteo_buteo	m	1		Mass	7.92	488	HoBR257323	House of Bird Research collection	7-15-1992	Haderslev, DK	55.16N 09.30E	Adult	This study (Johannes Erritzøe House of Bird Research collection)
Accipitriformes	Accipitridae	Buteo	buteo	buteo	Buteo_buteo	m	1		Mass	8.237	815	HoBR328713	House of Bird Research collection	12-16-2003	Haderslev, DK	55.16N 09.30E	Adult	This study (Johannes Erritzøe House of Bird Research collection)
Accipitriformes	Accipitridae	Buteo	buteo	buteo	Buteo_buteo	m	1		Mass	7.2	460	HoBR257763	House of Bird Research collection	2-19-1994	Haderslev, DK	55.16N 09.30E	Adult	This study (Johannes Erritzøe House of Bird Research collection)
Accipitriformes	Accipitridae	Buteo	buteo	buteo	Buteo_buteo	m	1		Mass	7.669	473	HoBR290701	House of Bird Research collection	4-7-1996	Haderslev, DK	55.16N 09.30E	Adult	This study (Johannes Erritzøe House of Bird Research collection)
Accipitriformes	Accipitridae	Buteo	buteo	buteo	Buteo_buteo	m	1		Mass	7.95	636	HoBR235609	House of Bird Research collection	2-19-1992	Sommersted, DK	55.18N 09.20E	Adult	This study (Johannes Erritzøe House of Bird Research collection)
Accipitriformes	Accipitridae	Buteo	buteo	buteo	Buteo_buteo	m	1		Mass	7.842	705	HoBR314415	House of Bird Research collection	3-11-2001	Sommersted, DK	55.18N 09.20E	unknown	This study (Johannes Erritzøe House of Bird Research collection)
Accipitriformes	Accipitridae	Buteo	buteo	buteo	Buteo_buteo	m	1		Mass	7.842	705	HoBR314415	House of Bird Research collection	3-11-2001	Sommersted, DK	55.18N 09.20E	unknown	This study (Johannes Erritzøe House of Bird Research collection)
Accipitriformes	Accipitridae	Buteo	buteo	buteo	Buteo_buteo	m	1		Mass	8.388	581	HoBR328872	House of Bird Research collection	5-xx-2004	Klovtoft, DK	55.20N 09.11E	Adult	This study (Johannes Erritzøe House of Bird Research collection)
Accipitriformes	Accipitridae	Buteo	buteo	buteo	Buteo_buteo	m	1		Mass	7.8	766.5	HoBR235800	House of Bird Research collection	1-10-1992	Hjerndrup, DK	55.20N 09.25E	Adult	This study (Johannes Erritzøe House of Bird Research collection)
Accipitriformes	Accipitridae	Buteo	buteo	buteo	Buteo_buteo	m	1		Mass	9.494	510	HoBR328739	House of Bird Research collection	3-5-2004	Stepping, DK	55.21N 09.22E	Adult	This study (Johannes Erritzøe House of Bird Research collection)
Accipitriformes	Accipitridae	Buteo	buteo	buteo	Buteo_buteo	m	1		Mass	7.9	512	HoBR216118	House of Bird Research collection	2-9-1988	Christiansfeld, DK	55.21N 09.29E	Adult	This study (Johannes Erritzøe House of Bird Research collection)
Accipitriformes	Accipitridae	Buteo	buteo	buteo	Buteo_buteo	m	1		Mass	8.104	565	HoBR353219	House of Bird Research collection	2-7-2010	Christiansfeld, DK	55.21N 09.29E	unknown	This study (Johannes Erritzøe House of Bird Research collection)
Accipitriformes	Accipitridae	Buteo	buteo	buteo	Buteo_buteo	m	1		Mass	8.445	829	HoBR290728	House of Bird Research collection	10-1-1996	Christiansfeld, DK	55.21N 09.29E	Adult	This study (Johannes Erritzøe House of Bird Research collection)
Accipitriformes	Accipitridae	Buteo	buteo	buteo	Buteo_buteo	m	1		Mass	7.9	853.5	HoBR257697	House of Bird Research collection	10-19-1993	Rødding, DK	55.22N 09.04E	Adult	This study (Johannes Erritzøe House of Bird Research collection)
Accipitriformes	Accipitridae	Buteo	buteo	buteo	Buteo_buteo	m	1		Mass	8.4	517.2	HoBR257752	House of Bird Research collection	2-4-1994	Sjølund, DK	55.24N 09.32E	unknown	This study (Johannes Erritzøe House of Bird Research collection)
Accipitriformes	Accipitridae	Buteo	buteo	buteo	Buteo_buteo	m	1		Mass	8.727	533	HoBR314399	House of Bird Research collection	3-7-2001	Sjølund, DK	55.24N 09.32E	Adult	This study (Johannes Erritzøe House of Bird Research collection)
Accipitriformes	Accipitridae	Buteo	buteo	buteo	Buteo_buteo	m	1		Mass	7.1	637.8	HoBR167054	House of Bird Research collection	1-22-1984	Vamdrup, DK	55.25N 09.17E	unknown	This study (Johannes Erritzøe House of Bird Research collection)
Accipitriformes	Accipitridae	Buteo	buteo	buteo	Buteo_buteo	m	1		Mass	7.45	730	HoBR215404	House of Bird Research collection	5-30-1987	Vamdrup, DK	55.25N 09.17E	Adult	This study (Johannes Erritzøe House of Bird Research collection)
Accipitriformes	Accipitridae	Buteo	buteo	buteo	Buteo_buteo	m	1		Mass	8.437	900	HoBR346252	House of Bird Research collection	12-20-2008	Vamdrup, DK	55.25N 09.17E	unknown	This study (Johannes Erritzøe House of Bird Research collection)
Accipitriformes	Accipitridae	Buteo	buteo	buteo	Buteo_buteo	m	1		Mass	8.011	610	HoBR346349	House of Bird Research collection	2-19-2009	Vamdrup, DK	55.25N 09.17E	unknown	This study (Johannes Erritzøe House of Bird Research collection)
Accipitriformes	Accipitridae	Buteo	buteo	buteo	Buteo_buteo	m	1		Mass	8.478	875	HoBR290799	House of Bird Research collection	12-17-1996	Ødis, DK	55.25N 09.23E	Adult	This study (Johannes Erritzøe House of Bird Research collection)
Accipitriformes	Accipitridae	Buteo	buteo	buteo	Buteo_buteo	m	1		Mass	8.12	736.2	HoBR171843	House of Bird Research collection	3-9-1986	Grønnehoved, DK	55.25N 09.33E	Adult	This study (Johannes Erritzøe House of Bird Research collection)
Accipitriformes	Accipitridae	Buteo	buteo	buteo	Buteo_buteo	m	1		Mass	8.022	663	HoBR291017	House of Bird Research collection	11-28-1997	Skanderup, DK	55.27N 09.20E	unknown	This study (Johannes Erritzøe House of Bird Research collection)
Accipitriformes	Accipitridae	Buteo	buteo	buteo	Buteo_buteo	m	1		Mass	7.924	840	HoBR353238	House of Bird Research collection	2-27-2010	Esbjerg, DK	55.28N 08.27E	unknown	This study (Johannes Erritzøe House of Bird Research collection)
Accipitriformes	Accipitridae	Buteo	buteo	buteo	Buteo_buteo	m	1		Mass	8	674.5	HoBR257472	House of Bird Research collection	1-1-1993	Vejen, DK	55.28N 09.10E	Adult	This study (Johannes Erritzøe House of Bird Research collection)
Accipitriformes	Accipitridae	Buteo	buteo	buteo	Buteo_buteo	m	1		Mass	8.355	651.5	HoBR274025	House of Bird Research collection	3-28-1996	Vejen, DK	55.28N 09.10E	unknown	This study (Johannes Erritzøe House of Bird Research collection)
Accipitriformes	Accipitridae	Buteo	buteo	buteo	Buteo_buteo	m	1		Mass	8.3	683	HoBR328765	House of Bird Research collection	3-26-2004	Lunderskov, DK	55.29N 09.18E	Adult	This study (Johannes Erritzøe House of Bird Research collection)
Accipitriformes	Accipitridae	Buteo	buteo	buteo	Buteo_buteo	m	1		Mass	7.595	483	HoBR299869	House of Bird Research collection	2-17-2000	Lunderskov, DK 1	55.29N 09.18E	unknown	This study (Johannes Erritzøe House of Bird Research collection)
Accipitriformes	Accipitridae	Buteo	buteo	buteo	Buteo_buteo	m	1		Mass	8.341	764	HoBR290702	House of Bird Research collection	8-9-1996	Trællenæs, Kolding, DK	55.29N 09.25E	Adult	This study (Johannes Erritzøe House of Bird Research collection)
Accipitriformes	Accipitridae	Buteo	buteo	buteo	Buteo_buteo	m	1		Mass	7.7	723.2	HoBR167071	House of Bird Research collection	2-1-1985	Kolding, DK	55.29N 09.28E	unknown	This study (Johannes Erritzøe House of Bird Research collection)
Accipitriformes	Accipitridae	Buteo	buteo	buteo	Buteo_buteo	m	1		Mass	7.5	466	HoBR167088	House of Bird Research collection	3-1-1985	Kolding, DK	55.29N 09.28E	unknown	This study (Johannes Erritzøe House of Bird Research collection)
Accipitriformes	Accipitridae	Buteo	buteo	buteo	Buteo_buteo	m	1		Mass	7.7	488.6	HoBR171472	House of Bird Research collection	2-20-1986	Kolding, DK	55.29N 09.28E	unknown	This study (Johannes Erritzøe House of Bird Research collection)
Accipitriformes	Accipitridae	Buteo	buteo	buteo	Buteo_buteo	m	1		Mass	8.3	792	HoBR235521	House of Bird Research collection	12-3-1990	Kolding, DK	55.29N 09.28E	Adult	This study (Johannes Erritzøe House of Bird Research collection)
Accipitriformes	Accipitridae	Buteo	buteo	buteo	Buteo_buteo	m	1		Mass	8.3	731	HoBR235678	House of Bird Research collection	5-15-1991	Kolding, DK	55.29N 09.28E	Adult	This study (Johannes Erritzøe House of Bird Research collection)
Accipitriformes	Accipitridae	Buteo	buteo	buteo	Buteo_buteo	m	1		Mass	8.775	531	HoBR338050	House of Bird Research collection	3-11-2006	Kolding, DK	55.29N 09.28E	unknown	This study (Johannes Erritzøe House of Bird Research collection)
Accipitriformes	Accipitridae	Buteo	buteo	buteo	Buteo_buteo	m	1		Mass	7.35	901	HoBR257717	House of Bird Research collection	11-12-1993	Kolding, DK,	55.29N 09.28E	unknown	This study (Johannes Erritzøe House of Bird Research collection)
Accipitriformes	Accipitridae	Buteo	buteo	buteo	Buteo_buteo	m	1		Mass	6.957	487	HoBR273948	House of Bird Research collection	12-26-1995	Kolding, DK,	55.29N 09.28E	Adult	This study (Johannes Erritzøe House of Bird Research collection)
Accipitriformes	Accipitridae	Buteo	buteo	buteo	Buteo_buteo	m	1		Mass	8.248	394	HoBR290704	House of Bird Research collection	8-13-1996	Kolding, DK,	55.29N 09.28E	unknown	This study (Johannes Erritzøe House of Bird Research collection)
Accipitriformes	Accipitridae	Buteo	buteo	buteo	Buteo_buteo	m	1		Mass	8.108	623	HoBR299705	House of Bird Research collection	6-17-1998	Kolding, DK,	55.29N 09.28E	Adult	This study (Johannes Erritzøe House of Bird Research collection)
Accipitriformes	Accipitridae	Buteo	buteo	buteo	Buteo_buteo	m	1		Mass	7.347	693	HoBR314380	House of Bird Research collection	1-19-2001	Kolding DK	55.29N 09.28E	Adult	This study (Johannes Erritzøe House of Bird Research collection)
Accipitriformes	Accipitridae	Buteo	buteo	buteo	Buteo_buteo	m	1		Mass	7.347	693	HoBR314380	House of Bird Research collection	1-19-2001	Kolding DK	55.29N 09.28E	Adult	This study (Johannes Erritzøe House of Bird Research collection)
Accipitriformes	Accipitridae	Buteo	buteo	buteo	Buteo_buteo	m	1		Mass	8	684.5	HoBR257630	House of Bird Research collection	10-19-1992	Brørup, DK	55.30N 09.05E	Adult	This study (Johannes Erritzøe House of Bird Research collection)
Accipitriformes	Accipitridae	Buteo	buteo	buteo	Buteo_buteo	m	1		Mass	7.463	600	HoBR346056	House of Bird Research collection	3-23-2008	Vejle, DK	55.42N 09.32E	Adult	This study (Johannes Erritzøe House of Bird Research collection)
Accipitriformes	Accipitridae	Buteo	buteo	buteo	Buteo_buteo	m	1		Mass	7.6	1045	HoBR257512	House of Bird Research collection	1992	Kibæk, DK	56.02N 08.57E	Adult	This study (Johannes Erritzøe House of Bird Research collection)
Accipitriformes	Accipitridae	Buteo	buteo	buteo	Buteo_buteo	m	1		Mass	8.95	478.5	HoBR215473	House of Bird Research collection	8-6-1987	Kalø, DK	56.19N 10.32E	Adult	This study (Johannes Erritzøe House of Bird Research collection)
Accipitriformes	Accipitridae	Buteo	buteo	buteo	Buteo_buteo	m	1		Mass	7.7	649.2	HoBR154164	House of Bird Research collection				unknown	This study (Johannes Erritzøe House of Bird Research collection)
Accipitriformes	Accipitridae	Buteo	buteo	buteo	Buteo_buteo	m	1		Mass	8.2	677.5	HoBR171244	House of Bird Research collection				Adult	This study (Johannes Erritzøe House of Bird Research collection)
Accipitriformes	Accipitridae	Buteo	buteo	buteo	Buteo_buteo	m	1		Mass	8.18	699	HoBR171278	House of Bird Research collection				unknown	This study (Johannes Erritzøe House of Bird Research collection)
Accipitriformes	Accipitridae	Buteo	buteo	buteo	Buteo_buteo	m	1		Mass	7.75	786	HoBR171754	House of Bird Research collection				Adult	This study (Johannes Erritzøe House of Bird Research collection)
Accipitriformes	Accipitridae	Buteo	buteo	buteo	Buteo_buteo	m	1		Mass	7.32	807	HoBR235586	House of Bird Research collection	2-8-1991			Adult	This study (Johannes Erritzøe House of Bird Research collection)
Accipitriformes	Accipitridae	Buteo	buteo	buteo	Buteo_buteo	m	1		Mass	8.007	877	HoBR273904	House of Bird Research collection	10-15-1995	between Haderslev and Åbenrå, DK		Adult	This study (Johannes Erritzøe House of Bird Research collection)
Accipitriformes	Accipitridae	Buteo	buteo	buteo	Buteo_buteo	m	1		Mass	7.969	845	HoBR353416	House of Bird Research collection	1-23-2011	Ribe-Esbjerg, DK		unknown	This study (Johannes Erritzøe House of Bird Research collection)
Accipitriformes	Accipitridae	Buteo	buteo	buteo	Buteo_buteo	m	1		Mass	7.357	890	HoBR353834	House of Bird Research collection	12-25-1012	Ødis-Vamdrup, DK		unknown	This study (Johannes Erritzøe House of Bird Research collection)
Accipitriformes	Accipitridae	Buteo	buteo	buteo	Buteo_buteo	m	1		Mass	7.301	672	HoBR290817	House of Bird Research collection	2-26-1997	between Kolding and Vamdrup, DK		unknown	This study (Johannes Erritzøe House of Bird Research collection)
Accipitriformes	Accipitridae	Buteo	buteo	buteo	Buteo_buteo	unknown	1		Mass	7.912	845	HoBR345957	House of Bird Research collection	11-20-2009	Anslet, DK	55.20N 09.37E	unknown	This study (Johannes Erritzøe House of Bird Research collection)
Accipitriformes	Accipitridae	Buteo	buteo	vulpinus	Buteo_buteo	m	1		Mass	7.9	558	CQ15A			Maji Moto Camp, Kenya		unknown	Crile G and Quiring DP (1940) Ohio J Sci 40:219-259.
Accipitriformes	Accipitridae	Buteo	jamaicensis		Buteo_jamaicensis	f	1	8.6	Vol		935.9	PMA 73.89.14	Royal Alberta Museum				unknown	This study (Andrew Iwaniuk unpublished data)
Accipitriformes	Accipitridae	Buteo	jamaicensis		Buteo_jamaicensis	f	1	9.9	Vol		1223.6	PMA 75.113.15	Royal Alberta Museum				unknown	This study (Andrew Iwaniuk unpublished data)
Accipitriformes	Accipitridae	Buteo	jamaicensis		Buteo_jamaicensis	f	1	9.8	Vol		1286.3	PMA 78.8.25	Royal Alberta Museum				unknown	This study (Andrew Iwaniuk unpublished data)
Accipitriformes	Accipitridae	Buteo	jamaicensis		Buteo_jamaicensis	f	1	8.9	Vol		995	PMA 79.48.7	Royal Alberta Museum				unknown	This study (Andrew Iwaniuk unpublished data)
Accipitriformes	Accipitridae	Buteo	jamaicensis		Buteo_jamaicensis	f	1	9	Vol		1003	PMA 80.124.5	Royal Alberta Museum				unknown	This study (Andrew Iwaniuk unpublished data)
Accipitriformes	Accipitridae	Buteo	jamaicensis		Buteo_jamaicensis	f	1	8.6	Vol		804.6	PMA 80.124.6	Royal Alberta Museum				unknown	This study (Andrew Iwaniuk unpublished data)
Accipitriformes	Accipitridae	Buteo	jamaicensis		Buteo_jamaicensis	f	1	8.4	Vol		934.8	PMA 80.20.42	Royal Alberta Museum				unknown	This study (Andrew Iwaniuk unpublished data)
Accipitriformes	Accipitridae	Buteo	jamaicensis		Buteo_jamaicensis	f	1	10	Vol		1134.3	PMA 81.146.67	Royal Alberta Museum				unknown	This study (Andrew Iwaniuk unpublished data)
Accipitriformes	Accipitridae	Buteo	jamaicensis		Buteo_jamaicensis	f	1	8.6	Vol		722.5	PMA 81.146.68	Royal Alberta Museum				unknown	This study (Andrew Iwaniuk unpublished data)
Accipitriformes	Accipitridae	Buteo	jamaicensis		Buteo_jamaicensis	f	1	8.3	Vol		574	PMA 81.146.75	Royal Alberta Museum				unknown	This study (Andrew Iwaniuk unpublished data)
Accipitriformes	Accipitridae	Buteo	jamaicensis		Buteo_jamaicensis	f	1	9.4	Vol		1286	PMA 81.146.77	Royal Alberta Museum				unknown	This study (Andrew Iwaniuk unpublished data)
Accipitriformes	Accipitridae	Buteo	jamaicensis		Buteo_jamaicensis	f	1	9	Vol		1076	PMA 82.33.52	Royal Alberta Museum				unknown	This study (Andrew Iwaniuk unpublished data)
Accipitriformes	Accipitridae	Buteo	jamaicensis		Buteo_jamaicensis	f	1	8.8	Vol		962	PMA 82.33.53	Royal Alberta Museum				unknown	This study (Andrew Iwaniuk unpublished data)
Accipitriformes	Accipitridae	Buteo	jamaicensis		Buteo_jamaicensis	m	1	8.4	Vol		973.5	PMA 71.55.28	Royal Alberta Museum				unknown	This study (Andrew Iwaniuk unpublished data)
Accipitriformes	Accipitridae	Buteo	jamaicensis		Buteo_jamaicensis	m	1	8.7	Vol		1059	PMA 76.108.1	Royal Alberta Museum				unknown	This study (Andrew Iwaniuk unpublished data)
Accipitriformes	Accipitridae	Buteo	jamaicensis		Buteo_jamaicensis	m	1	6.8	Vol		963	PMA 79.38.49	Royal Alberta Museum				unknown	This study (Andrew Iwaniuk unpublished data)
Accipitriformes	Accipitridae	Buteo	jamaicensis		Buteo_jamaicensis	m	1	8.9	Vol		889.5	PMA 80.20.40	Royal Alberta Museum				unknown	This study (Andrew Iwaniuk unpublished data)
Accipitriformes	Accipitridae	Buteo	jamaicensis		Buteo_jamaicensis	m	1	8.8	Vol		891.7	PMA 80.20.43	Royal Alberta Museum				unknown	This study (Andrew Iwaniuk unpublished data)
Accipitriformes	Accipitridae	Buteo	jamaicensis		Buteo_jamaicensis	m	1	8.8	Vol		1024.9	PMA 80.9.149	Royal Alberta Museum				unknown	This study (Andrew Iwaniuk unpublished data)
Accipitriformes	Accipitridae	Buteo	jamaicensis		Buteo_jamaicensis	m	1	8.3	Vol		836	PMA 81.146.69	Royal Alberta Museum				unknown	This study (Andrew Iwaniuk unpublished data)
Accipitriformes	Accipitridae	Buteo	jamaicensis		Buteo_jamaicensis	m	1	8.9	Vol		1003.5	PMA 81.146.71	Royal Alberta Museum				unknown	This study (Andrew Iwaniuk unpublished data)
Accipitriformes	Accipitridae	Buteo	jamaicensis		Buteo_jamaicensis	m	1	8.9	Vol		562.5	PMA 83.12.11	Royal Alberta Museum				unknown	This study (Andrew Iwaniuk unpublished data)
Accipitriformes	Accipitridae	Buteo	jamaicensis		Buteo_jamaicensis	m	1	9	Vol		755.5	PMA 83.8.42	Royal Alberta Museum				unknown	This study (Andrew Iwaniuk unpublished data)
Accipitriformes	Accipitridae	Buteo	jamaicensis		Buteo_jamaicensis	m	1	8.5	Vol		910.8	PMA 83.8.48	Royal Alberta Museum				unknown	This study (Andrew Iwaniuk unpublished data)
Accipitriformes	Accipitridae	Buteo	jamaicensis		Buteo_jamaicensis	m	1	8.6	Vol		641.2	PMA 85.11.3	Royal Alberta Museum				unknown	This study (Andrew Iwaniuk unpublished data)
Accipitriformes	Accipitridae	Buteo	jamaicensis		Buteo_jamaicensis	m	1	9	Vol		891.9	PMA 86.4.25	Royal Alberta Museum				unknown	This study (Andrew Iwaniuk unpublished data)
Accipitriformes	Accipitridae	Buteo	jamaicensis		Buteo_jamaicensis	m	1	9.3	Vol		857.5	PMA 86.4.54	Royal Alberta Museum				unknown	This study (Andrew Iwaniuk unpublished data)
Accipitriformes	Accipitridae	Buteo	lagopus	lagopus	Buteo_lagopus	m	1		Mass	8.549	865	HoBR353952	House of Bird Research collection	11-24-2011	Skrydstrup, DK	55.15N 09.15E	unknown	This study (Johannes Erritzøe House of Bird Research collection)
Accipitriformes	Accipitridae	Buteo	lagopus		Buteo_lagopus	f	1	9.1	Vol		1127.2	PMA 77.90.1	Royal Alberta Museum				unknown	This study (Andrew Iwaniuk unpublished data)
Accipitriformes	Accipitridae	Buteo	lagopus		Buteo_lagopus	f	1	10.2	Vol		1221.2	PMA 78.3.10	Royal Alberta Museum				unknown	This study (Andrew Iwaniuk unpublished data)
Accipitriformes	Accipitridae	Buteo	lagopus		Buteo_lagopus	f	1	9.8	Vol		1219.7	PMA 79.44.6	Royal Alberta Museum				unknown	This study (Andrew Iwaniuk unpublished data)
Accipitriformes	Accipitridae	Buteo	lagopus		Buteo_lagopus	f	1	8.7	Vol		937.4	PMA 79.44.8	Royal Alberta Museum				unknown	This study (Andrew Iwaniuk unpublished data)
Accipitriformes	Accipitridae	Buteo	lagopus		Buteo_lagopus	f	1	9	Vol		854.9	PMA 80.9.54	Royal Alberta Museum				unknown	This study (Andrew Iwaniuk unpublished data)
Accipitriformes	Accipitridae	Buteo	lagopus		Buteo_lagopus	f	1	9.3	Vol		1474	PMA 81.146.6	Royal Alberta Museum				unknown	This study (Andrew Iwaniuk unpublished data)
Accipitriformes	Accipitridae	Buteo	lagopus		Buteo_lagopus	f	1	9	Vol		1223	PMA 81.3.53	Royal Alberta Museum				unknown	This study (Andrew Iwaniuk unpublished data)
Accipitriformes	Accipitridae	Buteo	lagopus		Buteo_lagopus	f	1	8.6	Vol		700.6	PMA 82.33.16	Royal Alberta Museum				unknown	This study (Andrew Iwaniuk unpublished data)
Accipitriformes	Accipitridae	Buteo	lagopus		Buteo_lagopus	f	1	8.8	Vol		1128.5	PMA 85.45.36	Royal Alberta Museum				unknown	This study (Andrew Iwaniuk unpublished data)
Accipitriformes	Accipitridae	Buteo	lagopus		Buteo_lagopus	f	1	8.9	Vol		864.7	PMA 85.9.57	Royal Alberta Museum				unknown	This study (Andrew Iwaniuk unpublished data)
Accipitriformes	Accipitridae	Buteo	lagopus		Buteo_lagopus	f	1	9.1	Vol		669.7	PMA 86.20.2	Royal Alberta Museum				unknown	This study (Andrew Iwaniuk unpublished data)
Accipitriformes	Accipitridae	Buteo	lagopus		Buteo_lagopus	f	1	8.4	Vol		684.8	PMA 86.4.65	Royal Alberta Museum				unknown	This study (Andrew Iwaniuk unpublished data)
Accipitriformes	Accipitridae	Buteo	lagopus		Buteo_lagopus	f	1	8.8	Vol		1093.2	PMA 86.59.26	Royal Alberta Museum				unknown	This study (Andrew Iwaniuk unpublished data)
Accipitriformes	Accipitridae	Buteo	lagopus		Buteo_lagopus	f	1		Mass	9.21	641	HoBR216082	House of Bird Research collection	12-31-1988	Vejstruprød, DK	55.24N 09.33E	Adult	This study (Johannes Erritzøe House of Bird Research collection)
Accipitriformes	Accipitridae	Buteo	lagopus		Buteo_lagopus	f	1		Mass	8.08	810	HoBR216108	House of Bird Research collection	1988	Kolding, DK	55.29N 09.28E	Adult	This study (Johannes Erritzøe House of Bird Research collection)
Accipitriformes	Accipitridae	Buteo	lagopus		Buteo_lagopus	f	1		Mass	9.394	1010	HoBR346321	House of Bird Research collection	10-22-2005	Kastrup, Dk	55.39N 12.39E	Adult	This study (Johannes Erritzøe House of Bird Research collection)
Accipitriformes	Accipitridae	Buteo	lagopus		Buteo_lagopus	m	1	8.7	Vol		839	PMA 71.55.26	Royal Alberta Museum				unknown	This study (Andrew Iwaniuk unpublished data)
Accipitriformes	Accipitridae	Buteo	lagopus		Buteo_lagopus	m	1	8.8	Vol		870	PMA 72.42.8	Royal Alberta Museum				unknown	This study (Andrew Iwaniuk unpublished data)
Accipitriformes	Accipitridae	Buteo	lagopus		Buteo_lagopus	m	1	8.5	Vol		1007.6	PMA 82.33.14	Royal Alberta Museum				unknown	This study (Andrew Iwaniuk unpublished data)
Accipitriformes	Accipitridae	Buteo	lagopus		Buteo_lagopus	m	1	8.4	Vol		867	PMA 84.50.37	Royal Alberta Museum				unknown	This study (Andrew Iwaniuk unpublished data)
Accipitriformes	Accipitridae	Buteo	lagopus		Buteo_lagopus	m	1	8.6	Vol		536.1	PMA 85.45.35	Royal Alberta Museum				unknown	This study (Andrew Iwaniuk unpublished data)
Accipitriformes	Accipitridae	Buteo	lineatus		Buteo_lineatus	m	1	7.2	Vol		539.4	USNM614338	National Museum of Natural History				unknown	This study (Andrew Iwaniuk unpublished data)
Accipitriformes	Accipitridae	Buteo	lineatus		Buteo_lineatus	unknown	1		Mass	7.4	337						Adult	Hrdlicka A (1905) Brain Weight in Vertebrates
Accipitriformes	Accipitridae	Buteo	magnirostris		Buteo_magnirostris	f	1	4.6	Vol		400	USNM613359	National Museum of Natural History				unknown	This study (Andrew Iwaniuk unpublished data)
Accipitriformes	Accipitridae	Buteo	magnirostris		Buteo_magnirostris	m	1	4.2	Vol		265	USNM562526	National Museum of Natural History				unknown	This study (Andrew Iwaniuk unpublished data)
Accipitriformes	Accipitridae	Buteo	magnirostris		Buteo_magnirostris	m	1	4.35	Vol		244	USNM562527	National Museum of Natural History				unknown	This study (Andrew Iwaniuk unpublished data)
Accipitriformes	Accipitridae	Buteo	magnirostris		Buteo_magnirostris	m	1	4.45	Vol		268	USNM562528	National Museum of Natural History				unknown	This study (Andrew Iwaniuk unpublished data)
Accipitriformes	Accipitridae	Buteo	magnirostris		Buteo_magnirostris	m	1	5.4	Vol		300	USNM614582	National Museum of Natural History				unknown	This study (Andrew Iwaniuk unpublished data)
Accipitriformes	Accipitridae	Buteo	platypterus		Buteo_platypterus	f	1	5.4	Vol		430	USNM611553	National Museum of Natural History				unknown	This study (Andrew Iwaniuk unpublished data)
Accipitriformes	Accipitridae	Buteo	platypterus		Buteo_platypterus	f	1	5.3	Vol		438	USNM613957	National Museum of Natural History				unknown	This study (Andrew Iwaniuk unpublished data)
Accipitriformes	Accipitridae	Buteo	platypterus		Buteo_platypterus	m	1	4.8	Vol		330	PMA 83.62.57	Royal Alberta Museum				unknown	This study (Andrew Iwaniuk unpublished data)
Accipitriformes	Accipitridae	Buteo	platypterus		Buteo_platypterus	m	1	4.5	Vol		337.4	PMA 83.62.58	Royal Alberta Museum				unknown	This study (Andrew Iwaniuk unpublished data)
Accipitriformes	Accipitridae	Buteo	regalis		Buteo_regalis	f	1	10	Vol		1731	PMA 87.7.1	Royal Alberta Museum				unknown	This study (Andrew Iwaniuk unpublished data)
Accipitriformes	Accipitridae	Buteo	regalis		Buteo_regalis	m	1	9.2	Vol		913.3	PMA 72.99.15	Royal Alberta Museum				unknown	This study (Andrew Iwaniuk unpublished data)
Accipitriformes	Accipitridae	Buteo	swainsoni		Buteo_swainsoni	f	1	8.3	Vol		1035	PMA 80.124.1	Royal Alberta Museum				unknown	This study (Andrew Iwaniuk unpublished data)
Accipitriformes	Accipitridae	Buteo	swainsoni		Buteo_swainsoni	f	1	7.4	Vol		612	PMA 80.124.3	Royal Alberta Museum				unknown	This study (Andrew Iwaniuk unpublished data)
Accipitriformes	Accipitridae	Buteo	swainsoni		Buteo_swainsoni	f	1	7.4	Vol		1156	PMA 80.9.11	Royal Alberta Museum				unknown	This study (Andrew Iwaniuk unpublished data)
Accipitriformes	Accipitridae	Buteo	swainsoni		Buteo_swainsoni	f	1	7.2	Vol		1059	PMA 81.146.26	Royal Alberta Museum				unknown	This study (Andrew Iwaniuk unpublished data)
Accipitriformes	Accipitridae	Buteo	swainsoni		Buteo_swainsoni	f	1	7.2	Vol		1011	PMA 81.146.30	Royal Alberta Museum				unknown	This study (Andrew Iwaniuk unpublished data)
Accipitriformes	Accipitridae	Buteo	swainsoni		Buteo_swainsoni	f	1	7.2	Vol		1061.5	PMA 82.33.47	Royal Alberta Museum				unknown	This study (Andrew Iwaniuk unpublished data)
Accipitriformes	Accipitridae	Buteo	swainsoni		Buteo_swainsoni	f	1	7.1	Vol		1269	PMA 82.33.49	Royal Alberta Museum				unknown	This study (Andrew Iwaniuk unpublished data)
Accipitriformes	Accipitridae	Buteo	swainsoni		Buteo_swainsoni	f	1	7.2	Vol		936	PMA 83.8.9	Royal Alberta Museum				unknown	This study (Andrew Iwaniuk unpublished data)
Accipitriformes	Accipitridae	Buteo	swainsoni		Buteo_swainsoni	f	1	7.4	Vol		1073.2	PMA 86.4.56	Royal Alberta Museum				unknown	This study (Andrew Iwaniuk unpublished data)
Accipitriformes	Accipitridae	Buteo	swainsoni		Buteo_swainsoni	f	1	6	Vol		987.9	PMA 90.45.13	Royal Alberta Museum				unknown	This study (Andrew Iwaniuk unpublished data)
Accipitriformes	Accipitridae	Buteo	swainsoni		Buteo_swainsoni	m	1	6.7	Vol		853.7	PMA 71.93.21	Royal Alberta Museum				unknown	This study (Andrew Iwaniuk unpublished data)
Accipitriformes	Accipitridae	Buteo	swainsoni		Buteo_swainsoni	m	1	7	Vol		884.7	PMA 72.99.1	Royal Alberta Museum				unknown	This study (Andrew Iwaniuk unpublished data)
Accipitriformes	Accipitridae	Buteo	swainsoni		Buteo_swainsoni	m	1	7	Vol		701.1	PMA 79.10.2	Royal Alberta Museum				unknown	This study (Andrew Iwaniuk unpublished data)
Accipitriformes	Accipitridae	Buteo	swainsoni		Buteo_swainsoni	m	1	6.9	Vol		752.7	PMA 79.44.10	Royal Alberta Museum				unknown	This study (Andrew Iwaniuk unpublished data)
Accipitriformes	Accipitridae	Buteo	swainsoni		Buteo_swainsoni	m	1	7.1	Vol		718	PMA 80.124.4	Royal Alberta Museum				unknown	This study (Andrew Iwaniuk unpublished data)
Accipitriformes	Accipitridae	Buteo	swainsoni		Buteo_swainsoni	m	1	7.7	Vol		840	PMA 81.146.27	Royal Alberta Museum				unknown	This study (Andrew Iwaniuk unpublished data)
Accipitriformes	Accipitridae	Buteo	swainsoni		Buteo_swainsoni	m	1	6.3	Vol		547.6	PMA 81.146.29	Royal Alberta Museum				unknown	This study (Andrew Iwaniuk unpublished data)
Accipitriformes	Accipitridae	Buteo	swainsoni		Buteo_swainsoni	m	1	7.3	Vol		505	PMA 81.3.37	Royal Alberta Museum				unknown	This study (Andrew Iwaniuk unpublished data)
Accipitriformes	Accipitridae	Buteo	swainsoni		Buteo_swainsoni	m	1	7.1	Vol		765.3	PMA 82.33.46	Royal Alberta Museum				unknown	This study (Andrew Iwaniuk unpublished data)
Accipitriformes	Accipitridae	Buteo	swainsoni		Buteo_swainsoni	m	1	7.2	Vol		700.6	PMA 82.33.48	Royal Alberta Museum				unknown	This study (Andrew Iwaniuk unpublished data)
Accipitriformes	Accipitridae	Buteo	swainsoni		Buteo_swainsoni	m	1	7.7	Vol		606.5	PMA 82.33.58	Royal Alberta Museum				unknown	This study (Andrew Iwaniuk unpublished data)
Accipitriformes	Accipitridae	Buteo	swainsoni		Buteo_swainsoni	m	1	6.7	Vol		640.7	PMA 83.8.30	Royal Alberta Museum				unknown	This study (Andrew Iwaniuk unpublished data)
Accipitriformes	Accipitridae	Buteo	swainsoni		Buteo_swainsoni	m	1	6.9	Vol		800.9	PMA 84.37.9	Royal Alberta Museum				unknown	This study (Andrew Iwaniuk unpublished data)
Accipitriformes	Accipitridae	Buteo	swainsoni		Buteo_swainsoni	m	1	7.2	Vol		844.5	PMA 84.66.16	Royal Alberta Museum				unknown	This study (Andrew Iwaniuk unpublished data)
Accipitriformes	Accipitridae	Buteo	swainsoni		Buteo_swainsoni	m	1	7.3	Vol		616.9	PMA 85.45.20	Royal Alberta Museum				unknown	This study (Andrew Iwaniuk unpublished data)
Accipitriformes	Accipitridae	Buteo	swainsoni		Buteo_swainsoni	m	1	7.4	Vol		869.6	PMA 85.9.51	Royal Alberta Museum				unknown	This study (Andrew Iwaniuk unpublished data)
Accipitriformes	Accipitridae	Buteo	swainsoni		Buteo_swainsoni	m	1	6.8	Vol		768	PMA 87.31.3	Royal Alberta Museum				unknown	This study (Andrew Iwaniuk unpublished data)
Accipitriformes	Accipitridae	Buteo	swainsoni		Buteo_swainsoni	m	1	7	Vol		807.6	PMA 98.5.3	Royal Alberta Museum				unknown	This study (Andrew Iwaniuk unpublished data)
Accipitriformes	Accipitridae	Buteogallus	anthracinus		Buteogallus_anthracinus	f	1	7	Vol		1125	USNM562529	National Museum of Natural History				unknown	This study (Andrew Iwaniuk unpublished data)
Accipitriformes	Accipitridae	Buteogallus	anthracinus		Buteogallus_anthracinus	f	1	7.35	Vol		960	USNM612261	National Museum of Natural History				unknown	This study (Andrew Iwaniuk unpublished data)
Accipitriformes	Accipitridae	Buteogallus	anthracinus		Buteogallus_anthracinus	m	1	6.65	Vol		770	USNM611554	National Museum of Natural History				unknown	This study (Andrew Iwaniuk unpublished data)
Accipitriformes	Accipitridae	Buteogallus	anthracinus		Buteogallus_anthracinus	m	1	7.1	Vol		830	USNM611555	National Museum of Natural History				unknown	This study (Andrew Iwaniuk unpublished data)
Accipitriformes	Accipitridae	Buteogallus	anthracinus		Buteogallus_anthracinus	m	1	7.55	Vol		850	USNM612260	National Museum of Natural History				unknown	This study (Andrew Iwaniuk unpublished data)
Accipitriformes	Accipitridae	Buteogallus	anthracinus		Buteogallus_anthracinus	m	1	7.1	Vol		770	USNM613358	National Museum of Natural History				unknown	This study (Andrew Iwaniuk unpublished data)
Accipitriformes	Accipitridae	Buteogallus	urubitinga		Buteogallus_urubitinga	m	1	10.5	Vol		1150	USNM621696	National Museum of Natural History				unknown	This study (Andrew Iwaniuk unpublished data)
Accipitriformes	Accipitridae	Circus	aeruginosus		Circus_aeruginosus	f	1		Mass	5.347	335	HoBR339117	House of Bird Research collection	9-17-2008	Horne, Hirtshals, DK	57.35N 09.58E	unknown	This study (Johannes Erritzøe House of Bird Research collection)
Accipitriformes	Accipitridae	Circus	aeruginosus		Circus_aeruginosus	m	1	5.3	Vol		570	MV B11532	Museum Victoria				unknown	This study (Andrew Iwaniuk unpublished data)
Accipitriformes	Accipitridae	Circus	aeruginosus		Circus_aeruginosus	m	1	5.3	Vol		567.5	MV B12891	Museum Victoria				unknown	This study (Andrew Iwaniuk unpublished data)
Accipitriformes	Accipitridae	Circus	aeruginosus		Circus_aeruginosus	m	1		Mass	5.619	545	HoBR346062	House of Bird Research collection	6-23-2007	Kastrup, DK	55.39N 12.39E	unknown	This study (Johannes Erritzøe House of Bird Research collection)
Accipitriformes	Accipitridae	Circus	aeruginosus		Circus_aeruginosus	m	1		Mass	5.953	540	HoBR308656	House of Bird Research collection	10-21-2002	Sæby, DK	57.20N 10.31E	Adult	This study (Johannes Erritzøe House of Bird Research collection)
Accipitriformes	Accipitridae	Circus	cyaneus		Circus_cyaneus	f	1	4.4	Vol		275.3	PMA 78.3.14	Royal Alberta Museum				unknown	This study (Andrew Iwaniuk unpublished data)
Accipitriformes	Accipitridae	Circus	cyaneus		Circus_cyaneus	f	1	4.5	Vol		412.2	PMA 79.144.4	Royal Alberta Museum				unknown	This study (Andrew Iwaniuk unpublished data)
Accipitriformes	Accipitridae	Circus	cyaneus		Circus_cyaneus	f	1	4.7	Vol		413	PMA 80.43.42	Royal Alberta Museum				unknown	This study (Andrew Iwaniuk unpublished data)
Accipitriformes	Accipitridae	Circus	cyaneus		Circus_cyaneus	m	1	4.6	Vol		273.9	PMA 80.9.160	Royal Alberta Museum				unknown	This study (Andrew Iwaniuk unpublished data)
Accipitriformes	Accipitridae	Elanus	axillaris		Elanus_axillaris	f	1	3.6	Vol		267.4	AMO66107	Australian Museum				unknown	This study (Andrew Iwaniuk unpublished data)
Accipitriformes	Accipitridae	Elanus	axillaris		Elanus_axillaris	f	1	3.8	Vol		280	ANWC22677	Australian National Wildlife Collection				unknown	This study (Andrew Iwaniuk unpublished data)
Accipitriformes	Accipitridae	Elanus	axillaris		Elanus_axillaris	f	1	3.3	Vol		191.8	MV B19989	Museum Victoria				unknown	This study (Andrew Iwaniuk unpublished data)
Accipitriformes	Accipitridae	Elanus	axillaris		Elanus_axillaris	m	1	3.35	Vol		260	ANWC22679	Australian National Wildlife Collection				unknown	This study (Andrew Iwaniuk unpublished data)
Accipitriformes	Accipitridae	Elanus	axillaris		Elanus_axillaris	m	1	3.2	Vol		176	MV B17819	Museum Victoria				unknown	This study (Andrew Iwaniuk unpublished data)
Accipitriformes	Accipitridae	Elanus	axillaris		Elanus_axillaris	m	1	3.2	Vol		260	MV B19216	Museum Victoria				unknown	This study (Andrew Iwaniuk unpublished data)
Accipitriformes	Accipitridae	Gyps	africanus		Gyps_africanus	f	1		Mass	19.6	5270	CQ9A			Maji Moto Camp, Kenya		unknown	Crile G and Quiring DP (1940) Ohio J Sci 40:219-259.
Accipitriformes	Accipitridae	Gyps	fulvus		Gyps_fulvus	unknown	1		Mass	22.85	9750	HoBR Not registered	House of Bird Research collection				unknown	This study (Johannes Erritzøe House of Bird Research collection)
Accipitriformes	Accipitridae	Haliaeetus	leucocephalus		Haliaeetus_leucocephalus	f	1	19	Vol		7000	PMA 80.9.105	Royal Alberta Museum				unknown	This study (Andrew Iwaniuk unpublished data)
Accipitriformes	Accipitridae	Haliaeetus	leucocephalus		Haliaeetus_leucocephalus	f	1	18	Vol		4769.5	PMA 83.62.60	Royal Alberta Museum				unknown	This study (Andrew Iwaniuk unpublished data)
Accipitriformes	Accipitridae	Haliaeetus	leucocephalus		Haliaeetus_leucocephalus	f	1	19.25	Vol		4544.7	PMA 84.8.1	Royal Alberta Museum				unknown	This study (Andrew Iwaniuk unpublished data)
Accipitriformes	Accipitridae	Haliaeetus	leucocephalus		Haliaeetus_leucocephalus	f	1	18	Vol		4925.9	PMA 85.45.29	Royal Alberta Museum				unknown	This study (Andrew Iwaniuk unpublished data)
Accipitriformes	Accipitridae	Haliaeetus	leucocephalus		Haliaeetus_leucocephalus	f	1	17.5	Vol		5159	PMA 86.4.16	Royal Alberta Museum				unknown	This study (Andrew Iwaniuk unpublished data)
Accipitriformes	Accipitridae	Haliaeetus	leucocephalus		Haliaeetus_leucocephalus	f	1	19.25	Vol		4330	PMA 86.4.20	Royal Alberta Museum				unknown	This study (Andrew Iwaniuk unpublished data)
Accipitriformes	Accipitridae	Haliaeetus	leucocephalus		Haliaeetus_leucocephalus	f	1	18.5	Vol		5602	PMA 86.59.33	Royal Alberta Museum				unknown	This study (Andrew Iwaniuk unpublished data)
Accipitriformes	Accipitridae	Haliaeetus	leucocephalus		Haliaeetus_leucocephalus	m	1	16.5	Vol		4142	PMA 78.3.7	Royal Alberta Museum				unknown	This study (Andrew Iwaniuk unpublished data)
Accipitriformes	Accipitridae	Haliaeetus	leucocephalus		Haliaeetus_leucocephalus	m	1	17.5	Vol		2864	PMA 79.118.1	Royal Alberta Museum				unknown	This study (Andrew Iwaniuk unpublished data)
Accipitriformes	Accipitridae	Haliaeetus	leucocephalus		Haliaeetus_leucocephalus	m	1	20	Vol		2500	PMA 82.33.27	Royal Alberta Museum				unknown	This study (Andrew Iwaniuk unpublished data)
Accipitriformes	Accipitridae	Haliaeetus	leucocephalus		Haliaeetus_leucocephalus	m	1	17.25	Vol		3500	PMA 82.33.28	Royal Alberta Museum				unknown	This study (Andrew Iwaniuk unpublished data)
Accipitriformes	Accipitridae	Haliaeetus	leucocephalus		Haliaeetus_leucocephalus	m	1	16	Vol		3021.6	PMA 84.50.26	Royal Alberta Museum				unknown	This study (Andrew Iwaniuk unpublished data)
Accipitriformes	Accipitridae	Haliaeetus	leucocephalus		Haliaeetus_leucocephalus	m	1	17.25	Vol		3611	PMA 85.9.45	Royal Alberta Museum				unknown	This study (Andrew Iwaniuk unpublished data)
Accipitriformes	Accipitridae	Haliaeetus	leucocephalus		Haliaeetus_leucocephalus	m	1	17	Vol		5269	PMA 98.1.1	Royal Alberta Museum				unknown	This study (Andrew Iwaniuk unpublished data)
Accipitriformes	Accipitridae	Haliaeetus	leucogaster		Haliaeetus_leucogaster	f	1	12.5	Vol		3004	MV B11537	Museum Victoria				unknown	This study (Andrew Iwaniuk unpublished data)
Accipitriformes	Accipitridae	Haliaeetus	leucogaster		Haliaeetus_leucogaster	f	1	13.75	Vol		3629	QM O27089	Queensland Museum				unknown	This study (Andrew Iwaniuk unpublished data)
Accipitriformes	Accipitridae	Haliaeetus	vocifer		Haliaeetus_vocifer	f	1		Mass	12.93	3500	CQ154			Maji Moto Camp, Kenya		unknown	Crile G and Quiring DP (1940) Ohio J Sci 40:219-259.
Accipitriformes	Accipitridae	Haliastur	indus		Haliastur_indus	m	1	7.1	Vol		466	AMO68472	Australian Museum				unknown	This study (Andrew Iwaniuk unpublished data)
Accipitriformes	Accipitridae	Haliastur	indus		Haliastur_indus	m	1	6.1	Vol		530	ANWC22719	Australian National Wildlife Collection				unknown	This study (Andrew Iwaniuk unpublished data)
Accipitriformes	Accipitridae	Haliastur	indus		Haliastur_indus	m	1	6.4	Vol		450	QM O28578	Queensland Museum				unknown	This study (Andrew Iwaniuk unpublished data)
Accipitriformes	Accipitridae	Haliastur	sphenurus		Haliastur_sphenurus	f	1	6.35	Vol		804.5	AMO66334	Australian Museum				unknown	This study (Andrew Iwaniuk unpublished data)
Accipitriformes	Accipitridae	Haliastur	sphenurus		Haliastur_sphenurus	f	1	6.9	Vol		1100	ANWC22709	Australian National Wildlife Collection				unknown	This study (Andrew Iwaniuk unpublished data)
Accipitriformes	Accipitridae	Haliastur	sphenurus		Haliastur_sphenurus	f	1	6.55	Vol		885	ANWC22714	Australian National Wildlife Collection				unknown	This study (Andrew Iwaniuk unpublished data)
Accipitriformes	Accipitridae	Haliastur	sphenurus		Haliastur_sphenurus	f	1	6.7	Vol		810	ANWC22716	Australian National Wildlife Collection				unknown	This study (Andrew Iwaniuk unpublished data)
Accipitriformes	Accipitridae	Haliastur	sphenurus		Haliastur_sphenurus	f	1	6.3	Vol		885.9	MV B1161	Museum Victoria				unknown	This study (Andrew Iwaniuk unpublished data)
Accipitriformes	Accipitridae	Haliastur	sphenurus		Haliastur_sphenurus	m	1	6.6	Vol		770	AMO65703	Australian Museum				unknown	This study (Andrew Iwaniuk unpublished data)
Accipitriformes	Accipitridae	Harpagus	bidentatus		Harpagus_bidentatus	f	1	3.8	Vol		216	USNM559320	National Museum of Natural History				unknown	This study (Andrew Iwaniuk unpublished data)
Accipitriformes	Accipitridae	Harpagus	bidentatus		Harpagus_bidentatus	f	1	3.6	Vol		199	USNM612259	National Museum of Natural History				unknown	This study (Andrew Iwaniuk unpublished data)
Accipitriformes	Accipitridae	Harpagus	bidentatus		Harpagus_bidentatus	m	1	3.8	Vol		168	USNM611556	National Museum of Natural History				unknown	This study (Andrew Iwaniuk unpublished data)
Accipitriformes	Accipitridae	Hieraaetus	morphnoides		Hieraaetus_morphnoides	f	1	7.9	Vol		1150	ANWC22794	Australian National Wildlife Collection				unknown	This study (Andrew Iwaniuk unpublished data)
Accipitriformes	Accipitridae	Hieraaetus	morphnoides		Hieraaetus_morphnoides	f	1	8.8	Vol		1700	ANWC22795	Australian National Wildlife Collection				unknown	This study (Andrew Iwaniuk unpublished data)
Accipitriformes	Accipitridae	Leucopternis	albicollis		Leucopternis_albicollis	m	1	7.75	Vol		567	USNM611558	National Museum of Natural History				unknown	This study (Andrew Iwaniuk unpublished data)
Accipitriformes	Accipitridae	Leucopternis	albicollis		Leucopternis_albicollis	m	1	8.55	Vol		652	USNM613956	National Museum of Natural History				unknown	This study (Andrew Iwaniuk unpublished data)
Accipitriformes	Accipitridae	Lophoictinia	isura		Lophoictinia_isura	f	1	6.5	Vol		525	ANWC44373	Australian National Wildlife Collection				unknown	This study (Andrew Iwaniuk unpublished data)
Accipitriformes	Accipitridae	Milvus	migrans		Milvus_migrans	f	1	5.7	Vol		570	ANWC22684	Australian National Wildlife Collection				unknown	This study (Andrew Iwaniuk unpublished data)
Accipitriformes	Accipitridae	Milvus	migrans		Milvus_migrans	f	1	5.45	Vol		720	ANWC22685	Australian National Wildlife Collection				unknown	This study (Andrew Iwaniuk unpublished data)
Accipitriformes	Accipitridae	Milvus	migrans		Milvus_migrans	f	1	6.1	Vol		695	ANWC22701	Australian National Wildlife Collection				unknown	This study (Andrew Iwaniuk unpublished data)
Accipitriformes	Accipitridae	Milvus	migrans		Milvus_migrans	f	1	5.6	Vol		690	ANWC22704	Australian National Wildlife Collection				unknown	This study (Andrew Iwaniuk unpublished data)
Accipitriformes	Accipitridae	Milvus	migrans		Milvus_migrans	m	1	6.3	Vol		540	ANWC22688	Australian National Wildlife Collection				unknown	This study (Andrew Iwaniuk unpublished data)
Accipitriformes	Accipitridae	Milvus	migrans		Milvus_migrans	m	1	6.1	Vol		540	ANWC22694	Australian National Wildlife Collection				unknown	This study (Andrew Iwaniuk unpublished data)
Accipitriformes	Accipitridae	Milvus	migrans		Milvus_migrans	m	1	5.6	Vol		520	ANWC22700	Australian National Wildlife Collection				unknown	This study (Andrew Iwaniuk unpublished data)
Accipitriformes	Accipitridae	Milvus	migrans		Milvus_migrans	m	1	5.9	Vol		540	ANWC22703	Australian National Wildlife Collection				unknown	This study (Andrew Iwaniuk unpublished data)
Accipitriformes	Accipitridae	Milvus	migrans		Milvus_migrans	m	1	5.5	Vol		471.5	MV B13873	Museum Victoria				unknown	This study (Andrew Iwaniuk unpublished data)
Accipitriformes	Accipitridae	Milvus	milvus		Milvus_milvus	m	1		Mass	7.3	895	HoBR299878	House of Bird Research collection	6-30-1999			Adult	This study (Johannes Erritzøe House of Bird Research collection)
Accipitriformes	Accipitridae	Parabuteo	unicinctus		Parabuteo_unicinctus	m	1	7.8	Vol		535	USNM614484	National Museum of Natural History				unknown	This study (Andrew Iwaniuk unpublished data)
Accipitriformes	Accipitridae	Pernis	apivorus		Pernis_apivorus	m	1		Mass	7.641	881	HoBR299576	House of Bird Research collection	8-8-1998	Arnum, DK	55.15N 08.58E	unknown	This study (Johannes Erritzøe House of Bird Research collection)
Accipitriformes	Pandionidae	Pandion	haliaetus		Pandion_haliaetus	f	1	8.25	Vol		1450	AMO67873	Australian Museum				unknown	This study (Andrew Iwaniuk unpublished data)
Accipitriformes	Pandionidae	Pandion	haliaetus		Pandion_haliaetus	f	1	9.7	Vol		1571	PMA 79.38.27	Royal Alberta Museum				unknown	This study (Andrew Iwaniuk unpublished data)
Accipitriformes	Pandionidae	Pandion	haliaetus		Pandion_haliaetus	m	1	9.5	Vol		1354.9	PMA 86.59.15	Royal Alberta Museum				unknown	This study (Andrew Iwaniuk unpublished data)
Accipitriformes	Sagittariidae	Sagittarius	serpentarius		Sagittarius_serpentarius	f	1	14.75	Vol		3330	USNM490786	National Museum of Natural History				unknown	This study (Andrew Iwaniuk unpublished data)
Anseriformes	Anatidae	Aix	galericulata		Aix_galericulata	f	1	3.89	Vol		510	ANWC22421	Australian National Wildlife Collection				unknown	This study (Andrew Iwaniuk unpublished data)
Anseriformes	Anatidae	Aix	galericulata		Aix_galericulata	f	1	3.87	Vol		587	CMNH S-16133	Carnegir Museum of Natural History				unknown	This study (Andrew Iwaniuk unpublished data)
Anseriformes	Anatidae	Aix	galericulata		Aix_galericulata	m	1	4.1	Vol		390	ANWC22420	Australian National Wildlife Collection				unknown	This study (Andrew Iwaniuk unpublished data)
Anseriformes	Anatidae	Aix	galericulata		Aix_galericulata	m	1		Mass	3.589	518	HoBR Not registered	House of Bird Research collection		captivity		Adult	This study (Johannes Erritzøe House of Bird Research collection)
Anseriformes	Anatidae	Aix	galericulata		Aix_galericulata	unknown	1		Mass	4.22	299						unknown	Hrdlicka A (1905) Brain Weight in Vertebrates
Anseriformes	Anatidae	Aix	sponsa		Aix_sponsa	f	1	3.84	Vol		493.4	CMN S-2118	Canadian Museum of Nature				unknown	This study (Andrew Iwaniuk unpublished data)
Anseriformes	Anatidae	Aix	sponsa		Aix_sponsa	f	1	4.18	Vol		685	FMNH 331345	Field Museum of Natural History				unknown	This study (Andrew Iwaniuk unpublished data)
Anseriformes	Anatidae	Aix	sponsa		Aix_sponsa	f	1	4.23	Vol		600	FMNH 342459	Field Museum of Natural History				unknown	This study (Andrew Iwaniuk unpublished data)
Anseriformes	Anatidae	Aix	sponsa		Aix_sponsa	f	1	3.92	Vol		670	FMNH 360616	Field Museum of Natural History				unknown	This study (Andrew Iwaniuk unpublished data)
Anseriformes	Anatidae	Aix	sponsa		Aix_sponsa	m	1	3.6	Vol		553.7	ANWC22418	Australian National Wildlife Collection				unknown	This study (Andrew Iwaniuk unpublished data)
Anseriformes	Anatidae	Aix	sponsa		Aix_sponsa	m	1	4.7	Vol		620	FMNH 331344	Field Museum of Natural History				unknown	This study (Andrew Iwaniuk unpublished data)
Anseriformes	Anatidae	Aix	sponsa		Aix_sponsa	m	1	4.24	Vol		585.7	FMNH 338956	Field Museum of Natural History				unknown	This study (Andrew Iwaniuk unpublished data)
Anseriformes	Anatidae	Aix	sponsa		Aix_sponsa	m	1	4.57	Vol		725	FMNH 348952	Field Museum of Natural History				unknown	This study (Andrew Iwaniuk unpublished data)
Anseriformes	Anatidae	Aix	sponsa		Aix_sponsa	m	1	4.08	Vol		728	FMNH 363242	Field Museum of Natural History				unknown	This study (Andrew Iwaniuk unpublished data)
Anseriformes	Anatidae	Aix	sponsa		Aix_sponsa	m	1	3.56	Vol		355	FMNH 364983	Field Museum of Natural History				unknown	This study (Andrew Iwaniuk unpublished data)
Anseriformes	Anatidae	Aix	sponsa		Aix_sponsa	m	1		Mass	3.147	330.19	HoBR Not registered	House of Bird Research collection		captivity		Adult	This study (Johannes Erritzøe House of Bird Research collection)
Anseriformes	Anatidae	Aix	sponsa		Aix_sponsa	m	1		Mass	4.85	592.5	HoBR Not registered	House of Bird Research collection				Adult	This study (Johannes Erritzøe House of Bird Research collection)
Anseriformes	Anatidae	Alopochen	aegyptiaca		Alopochen_aegyptiaca	f	1		Mass	7.64	1935	CQ18A			Lake Manyara, Tanzania		unknown	Crile G and Quiring DP (1940) Ohio J Sci 40:219-259.
Anseriformes	Anatidae	Alopochen	aegyptiaca		Alopochen_aegyptiaca	f	1	6.59	Vol		1084.4	ROM 112516	Royal Ontario Museum				unknown	This study (Andrew Iwaniuk unpublished data)
Anseriformes	Anatidae	Amazonetta	brasiliensis	brasiliensis	Amazonetta_brasiliensis	m	1	3.32	Vol		420.3	ROM 128874	Royal Ontario Museum				unknown	This study (Andrew Iwaniuk unpublished data)
Anseriformes	Anatidae	Amazonetta	brasiliensis	ipecutiri	Amazonetta_brasiliensis	f	1	3.5	Vol		487	LA93134					unknown	This study (Andrew Iwaniuk unpublished data)
Anseriformes	Anatidae	Amazonetta	brasiliensis	ipecutiri	Amazonetta_brasiliensis	m	1	3.75	Vol		530	LA93068					unknown	This study (Andrew Iwaniuk unpublished data)
Anseriformes	Anatidae	Amazonetta	brasiliensis	ipecutiri	Amazonetta_brasiliensis	m	1	3.49	Vol		525	LA93103					unknown	This study (Andrew Iwaniuk unpublished data)
Anseriformes	Anatidae	Anas	acuta		Anas_acuta	f	1		Mass	4.9548	670	CQ29			Churchill, Canada		unknown	Crile G and Quiring DP (1940) Ohio J Sci 40:219-259.
Anseriformes	Anatidae	Anas	acuta		Anas_acuta	f	1	4.6	Vol		884.3	PMA75.91.3	Royal Alberta Museum				unknown	This study (Andrew Iwaniuk unpublished data)
Anseriformes	Anatidae	Anas	acuta		Anas_acuta	f	1	4.7	Vol		635	PMA80.74.6	Royal Alberta Museum				unknown	This study (Andrew Iwaniuk unpublished data)
Anseriformes	Anatidae	Anas	acuta		Anas_acuta	f	1	4.4	Vol		767.1	PMA86.17.16	Royal Alberta Museum				unknown	This study (Andrew Iwaniuk unpublished data)
Anseriformes	Anatidae	Anas	acuta		Anas_acuta	f	1	4.33	Vol		675	ROM 127685	Royal Ontario Museum				unknown	This study (Andrew Iwaniuk unpublished data)
Anseriformes	Anatidae	Anas	acuta		Anas_acuta	f	1	5.06	Vol		860	ROM 127732	Royal Ontario Museum				unknown	This study (Andrew Iwaniuk unpublished data)
Anseriformes	Anatidae	Anas	acuta		Anas_acuta	m	1	4.72	Vol		889	ANWC 22509	Australian National Wildlife Collection				unknown	This study (Andrew Iwaniuk unpublished data)
Anseriformes	Anatidae	Anas	acuta		Anas_acuta	m	1	4.42	Vol		697	CMNH S-14315	Carnegir Museum of Natural History				unknown	This study (Andrew Iwaniuk unpublished data)
Anseriformes	Anatidae	Anas	acuta		Anas_acuta	m	1	4.9	Vol		800.9	PMA72.102.2	Royal Alberta Museum				unknown	This study (Andrew Iwaniuk unpublished data)
Anseriformes	Anatidae	Anas	acuta		Anas_acuta	m	1	5	Vol		822	PMA75.108.10	Royal Alberta Museum				unknown	This study (Andrew Iwaniuk unpublished data)
Anseriformes	Anatidae	Anas	acuta		Anas_acuta	m	1	5.1	Vol		926.2	PMA79.36.31	Royal Alberta Museum				unknown	This study (Andrew Iwaniuk unpublished data)
Anseriformes	Anatidae	Anas	acuta		Anas_acuta	m	1	4.9	Vol		954.7	PMA81.87.8	Royal Alberta Museum				unknown	This study (Andrew Iwaniuk unpublished data)
Anseriformes	Anatidae	Anas	acuta		Anas_acuta	m	1	5.1	Vol		1126	PMA84.55.6	Royal Alberta Museum				unknown	This study (Andrew Iwaniuk unpublished data)
Anseriformes	Anatidae	Anas	acuta		Anas_acuta	m	1		Mass	5.241	1480	HoBR Not registered	House of Bird Research collection	12-5-2006	Ribe, DK	55.20N 08.46E	Adult	This study (Johannes Erritzøe House of Bird Research collection)
Anseriformes	Anatidae	Anas	americana		Anas_americana	f	1	3.8	Vol		775	CMN S-3282	Canadian Museum of Nature				unknown	This study (Andrew Iwaniuk unpublished data)
Anseriformes	Anatidae	Anas	americana		Anas_americana	f	1	3.71	Vol		865	FMNH 348205	Field Museum of Natural History				unknown	This study (Andrew Iwaniuk unpublished data)
Anseriformes	Anatidae	Anas	americana		Anas_americana	f	1	3.7	Vol		696.4	PMA 82.30.4	Royal Alberta Museum				unknown	This study (Andrew Iwaniuk unpublished data)
Anseriformes	Anatidae	Anas	americana		Anas_americana	f	1	4	Vol		896.5	PMA 82.73.13	Royal Alberta Museum				unknown	This study (Andrew Iwaniuk unpublished data)
Anseriformes	Anatidae	Anas	americana		Anas_americana	f	1	3.5	Vol		576.9	PMA 87.27.131	Royal Alberta Museum				unknown	This study (Andrew Iwaniuk unpublished data)
Anseriformes	Anatidae	Anas	americana		Anas_americana	f	1	4	Vol		573	PMA 89.57.18	Royal Alberta Museum				unknown	This study (Andrew Iwaniuk unpublished data)
Anseriformes	Anatidae	Anas	americana		Anas_americana	m	1	3.89	Vol		465.8	FMNH 379040	Field Museum of Natural History				unknown	This study (Andrew Iwaniuk unpublished data)
Anseriformes	Anatidae	Anas	americana		Anas_americana	m	1	3.8	Vol		583.8	PMA 80.115.2	Royal Alberta Museum				unknown	This study (Andrew Iwaniuk unpublished data)
Anseriformes	Anatidae	Anas	americana		Anas_americana	m	1	4.4	Vol		798	PMA 82.30.1	Royal Alberta Museum				unknown	This study (Andrew Iwaniuk unpublished data)
Anseriformes	Anatidae	Anas	americana		Anas_americana	m	1	3.9	Vol		898.9	PMA 82.73.12	Royal Alberta Museum				unknown	This study (Andrew Iwaniuk unpublished data)
Anseriformes	Anatidae	Anas	americana		Anas_americana	m	1	4.3	Vol		849.2	PMA 87.89.1	Royal Alberta Museum				unknown	This study (Andrew Iwaniuk unpublished data)
Anseriformes	Anatidae	Anas	bahamensis	bahamensis	Anas_bahamensis	m	1	3.71	Vol		494	FLMNH 42469	Florida Museum of Natural History				unknown	This study (Andrew Iwaniuk unpublished data)
Anseriformes	Anatidae	Anas	castanea		Anas_castanea	f	1	3.68	Vol		440	ANWC22494	Australian National Wildlife Collection				unknown	This study (Andrew Iwaniuk unpublished data)
Anseriformes	Anatidae	Anas	castanea		Anas_castanea	f	1	3.6	Vol		770	ANWC22497	Australian National Wildlife Collection				unknown	This study (Andrew Iwaniuk unpublished data)
Anseriformes	Anatidae	Anas	castanea		Anas_castanea	m	1	3.93	Vol		622	MONZ 22087	Museum of New Zealand Te Papa Tongarewa				unknown	This study (Andrew Iwaniuk unpublished data)
Anseriformes	Anatidae	Anas	castanea		Anas_castanea	m	1	3.59	Vol		500	MV B10385	Museum Victoria				unknown	This study (Andrew Iwaniuk unpublished data)
Anseriformes	Anatidae	Anas	castanea		Anas_castanea	m	1	3.6	Vol		597	MV B20306	Museum Victoria				unknown	This study (Andrew Iwaniuk unpublished data)
Anseriformes	Anatidae	Anas	castanea		Anas_castanea	m	1	4.14	Vol		570	ROM 122704	Royal Ontario Museum				unknown	This study (Andrew Iwaniuk unpublished data)
Anseriformes	Anatidae	Anas	chlorotis		Anas_chlorotis	m	1	3.99	Vol		495	MONZ 27256	Museum of New Zealand Te Papa Tongarewa				unknown	This study (Andrew Iwaniuk unpublished data)
Anseriformes	Anatidae	Anas	clypeata		Anas_clypeata	f	1	3.12	Vol		725	CMN S-3279	Canadian Museum of Nature				unknown	This study (Andrew Iwaniuk unpublished data)
Anseriformes	Anatidae	Anas	clypeata		Anas_clypeata	f	1	3.12	Vol		530	CMNH S-11989	Carnegir Museum of Natural History				unknown	This study (Andrew Iwaniuk unpublished data)
Anseriformes	Anatidae	Anas	clypeata		Anas_clypeata	f	1	3.31	Vol		420	FMNH 351036	Field Museum of Natural History				unknown	This study (Andrew Iwaniuk unpublished data)
Anseriformes	Anatidae	Anas	clypeata		Anas_clypeata	f	1	3.2	Vol		597	PMA79.15.54	Royal Alberta Museum				unknown	This study (Andrew Iwaniuk unpublished data)
Anseriformes	Anatidae	Anas	clypeata		Anas_clypeata	f	1	3.3	Vol		591.8	PMA82.70.1	Royal Alberta Museum				unknown	This study (Andrew Iwaniuk unpublished data)
Anseriformes	Anatidae	Anas	clypeata		Anas_clypeata	f	1	3.1	Vol		427.3	PMA89.70.2	Royal Alberta Museum				unknown	This study (Andrew Iwaniuk unpublished data)
Anseriformes	Anatidae	Anas	clypeata		Anas_clypeata	m	1	3.5	Vol		750	CMN S-3280	Canadian Museum of Nature				unknown	This study (Andrew Iwaniuk unpublished data)
Anseriformes	Anatidae	Anas	clypeata		Anas_clypeata	m	1	3.64	Vol		578	CMNH S-11988	Carnegir Museum of Natural History				unknown	This study (Andrew Iwaniuk unpublished data)
Anseriformes	Anatidae	Anas	clypeata		Anas_clypeata	m	1	3.2	Vol		543.5	PMA72.11.2	Royal Alberta Museum				unknown	This study (Andrew Iwaniuk unpublished data)
Anseriformes	Anatidae	Anas	clypeata		Anas_clypeata	m	1	3.6	Vol		550.8	PMA87.31.6	Royal Alberta Museum				unknown	This study (Andrew Iwaniuk unpublished data)
Anseriformes	Anatidae	Anas	crecca	carolinensis	Anas_crecca	f	1		Mass	3.116	305	CQ27			Churchill, Canada		unknown	Crile G and Quiring DP (1940) Ohio J Sci 40:219-259.
Anseriformes	Anatidae	Anas	crecca	carolinensis	Anas_crecca	f	1		Mass	3.25	252.6						Adult	Hrdlicka A (1905) Brain Weight in Vertebrates
Anseriformes	Anatidae	Anas	crecca	carolinensis	Anas_crecca	m	1		Mass	3.05	271.7						Adult	Hrdlicka A (1905) Brain Weight in Vertebrates
Anseriformes	Anatidae	Anas	crecca	carolinensis	Anas_crecca	m	1	2.64	Vol		273	CMNH S-12015	Carnegir Museum of Natural History				unknown	This study (Andrew Iwaniuk unpublished data)
Anseriformes	Anatidae	Anas	crecca	carolinensis	Anas_crecca	m	1	2.8	Vol		301	FMNH 348204	Field Museum of Natural History				unknown	This study (Andrew Iwaniuk unpublished data)
Anseriformes	Anatidae	Anas	crecca	carolinensis	Anas_crecca	unknown	1		Mass	3.45	155.5						Adult	Hrdlicka A (1905) Brain Weight in Vertebrates
Anseriformes	Anatidae	Anas	crecca	carolinensis	Anas_crecca	unknown	1		Mass	3.15	187.5						Adult	Hrdlicka A (1905) Brain Weight in Vertebrates
Anseriformes	Anatidae	Anas	crecca	carolinensis	Anas_crecca	unknown	1		Mass	2.95	196						Adult	Hrdlicka A (1905) Brain Weight in Vertebrates
Anseriformes	Anatidae	Anas	crecca	crecca	Anas_crecca	f	1	2.54	Vol		265	ZMUC collection	Zoological Museum at University of Copenhagen				unknown	This study (Andrew Iwaniuk unpublished data)
Anseriformes	Anatidae	Anas	crecca	crecca	Anas_crecca	f	1	2.48	Vol		274	ZMUC collection	Zoological Museum at University of Copenhagen				unknown	This study (Andrew Iwaniuk unpublished data)
Anseriformes	Anatidae	Anas	crecca	crecca	Anas_crecca	f	1	2.51	Vol		289	ZMUC collection	Zoological Museum at University of Copenhagen				unknown	This study (Andrew Iwaniuk unpublished data)
Anseriformes	Anatidae	Anas	crecca	crecca	Anas_crecca	f	1	2.57	Vol		295	ZMUC collection	Zoological Museum at University of Copenhagen				unknown	This study (Andrew Iwaniuk unpublished data)
Anseriformes	Anatidae	Anas	crecca	crecca	Anas_crecca	m	1	2.92	Vol		315	ZMUC collection	Zoological Museum at University of Copenhagen				unknown	This study (Andrew Iwaniuk unpublished data)
Anseriformes	Anatidae	Anas	crecca	crecca	Anas_crecca	m	1	2.78	Vol		321	ZMUC collection	Zoological Museum at University of Copenhagen				unknown	This study (Andrew Iwaniuk unpublished data)
Anseriformes	Anatidae	Anas	crecca	crecca	Anas_crecca	m	1	2.94	Vol		398	ZMUC collection	Zoological Museum at University of Copenhagen				unknown	This study (Andrew Iwaniuk unpublished data)
Anseriformes	Anatidae	Anas	crecca	crecca	Anas_crecca	m	1		Mass	2.934	366.3	HoBR Not registered	House of Bird Research collection	12-12-2008	Ballum Enge, DK	55.06N 08.41E	Adult	This study (Johannes Erritzøe House of Bird Research collection)
Anseriformes	Anatidae	Anas	crecca	crecca	Anas_crecca	m	1		Mass	2.855	368	HoBR314713	House of Bird Research collection	11-1-2002	Roskilde Fjord, DK	55.41N 11.10E	Adult	This study (Johannes Erritzøe House of Bird Research collection)
Anseriformes	Anatidae	Anas	crecca	crecca	Anas_crecca	m	1		Mass	2.689	353.33	HoBR Not registered	House of Bird Research collection	12-10-2011	Åkær, Odder, DK	55.55N 10.06E	Adult	This study (Johannes Erritzøe House of Bird Research collection)
Anseriformes	Anatidae	Anas	crecca	crecca	Anas_crecca	m	1		Mass	2.9	361	HoBR215838	House of Bird Research collection				Adult	This study (Johannes Erritzøe House of Bird Research collection)
Anseriformes	Anatidae	Anas	crecca	crecca	Anas_crecca	m	1		Mass	3	364	HoBR Not registered	House of Bird Research collection				Adult	This study (Johannes Erritzøe House of Bird Research collection)
Anseriformes	Anatidae	Anas	crecca	nimia	Anas_crecca	m	1	2.8	Vol		402	UAM 10233	Museum of University of Alaska Fairbanks				unknown	This study (Andrew Iwaniuk unpublished data)
Anseriformes	Anatidae	Anas	crecca	nimia	Anas_crecca	m	1	3.13	Vol		418.9	UAM 11337	Museum of University of Alaska Fairbanks				unknown	This study (Andrew Iwaniuk unpublished data)
Anseriformes	Anatidae	Anas	crecca		Anas_crecca	f	1	2.6	Vol		283.9	PMA 79.15.168	Royal Alberta Museum				unknown	This study (Andrew Iwaniuk unpublished data)
Anseriformes	Anatidae	Anas	crecca		Anas_crecca	f	1	2.6	Vol		330	PMA 81.3.52	Royal Alberta Museum				unknown	This study (Andrew Iwaniuk unpublished data)
Anseriformes	Anatidae	Anas	crecca		Anas_crecca	f	1	2.4	Vol		306.6	PMA 87.27.14	Royal Alberta Museum				unknown	This study (Andrew Iwaniuk unpublished data)
Anseriformes	Anatidae	Anas	crecca		Anas_crecca	m	1	2.5	Vol		318	PMA 72.72.2	Royal Alberta Museum				unknown	This study (Andrew Iwaniuk unpublished data)
Anseriformes	Anatidae	Anas	crecca		Anas_crecca	m	1	2.5	Vol		329.4	PMA 79.15.101	Royal Alberta Museum				unknown	This study (Andrew Iwaniuk unpublished data)
Anseriformes	Anatidae	Anas	crecca		Anas_crecca	m	1	2.7	Vol		316	PMA 80.74.5	Royal Alberta Museum				unknown	This study (Andrew Iwaniuk unpublished data)
Anseriformes	Anatidae	Anas	crecca		Anas_crecca	m	1	2.9	Vol		352.1	PMA 84.19.1	Royal Alberta Museum				unknown	This study (Andrew Iwaniuk unpublished data)
Anseriformes	Anatidae	Anas	crecca		Anas_crecca	m	1	3	Vol		358.6	PMA 86.17.13	Royal Alberta Museum				unknown	This study (Andrew Iwaniuk unpublished data)
Anseriformes	Anatidae	Anas	cyanoptera	septentrionalium	Anas_cyanoptera	f	1	3	Vol		370	BM 50085	Burke Museum of Natural History				unknown	This study (Andrew Iwaniuk unpublished data)
Anseriformes	Anatidae	Anas	cyanoptera	septentrionalium	Anas_cyanoptera	m	1	3.34	Vol		262.5	SDNHM 38069	San Diego Natural History Museum				unknown	This study (Andrew Iwaniuk unpublished data)
Anseriformes	Anatidae	Anas	cyanoptera	septentrionalium	Anas_cyanoptera	m	1	3.06	Vol		355	SDNHM 40576	San Diego Natural History Museum				unknown	This study (Andrew Iwaniuk unpublished data)
Anseriformes	Anatidae	Anas	discors		Anas_discors	f	1	2.8	Vol		329	PMA80.74.3	Royal Alberta Museum				unknown	This study (Andrew Iwaniuk unpublished data)
Anseriformes	Anatidae	Anas	discors		Anas_discors	f	1	2.73	Vol		403	PMA81.3.51	Royal Alberta Museum				unknown	This study (Andrew Iwaniuk unpublished data)
Anseriformes	Anatidae	Anas	discors		Anas_discors	f	1	2.7	Vol		360.7	PMA87.34.1	Royal Alberta Museum				unknown	This study (Andrew Iwaniuk unpublished data)
Anseriformes	Anatidae	Anas	discors		Anas_discors	f	1	2.7	Vol		359	SNM 17568	Sam Noble Museum, University of Oklahoma				unknown	This study (Andrew Iwaniuk unpublished data)
Anseriformes	Anatidae	Anas	discors		Anas_discors	m	1	2.58	Vol		322	ANWC 22511	Australian National Wildlife Collection				unknown	This study (Andrew Iwaniuk unpublished data)
Anseriformes	Anatidae	Anas	discors		Anas_discors	m	1	2.7	Vol		362	CMNH S-7446	Carnegir Museum of Natural History				unknown	This study (Andrew Iwaniuk unpublished data)
Anseriformes	Anatidae	Anas	discors		Anas_discors	m	1	3.2	Vol		378.1	PMA 72.102.8	Royal Alberta Museum				unknown	This study (Andrew Iwaniuk unpublished data)
Anseriformes	Anatidae	Anas	discors		Anas_discors	m	1	2.9	Vol		284.2	PMA 79.15.208	Royal Alberta Museum				unknown	This study (Andrew Iwaniuk unpublished data)
Anseriformes	Anatidae	Anas	discors		Anas_discors	m	1	3	Vol		336	PMA 80.74.2	Royal Alberta Museum				unknown	This study (Andrew Iwaniuk unpublished data)
Anseriformes	Anatidae	Anas	discors		Anas_discors	m	1	3.1	Vol		456	PMA 81.145.1	Royal Alberta Museum				unknown	This study (Andrew Iwaniuk unpublished data)
Anseriformes	Anatidae	Anas	discors		Anas_discors	m	1	2.8	Vol		370.6	PMA 84.68.1	Royal Alberta Museum				unknown	This study (Andrew Iwaniuk unpublished data)
Anseriformes	Anatidae	Anas	discors		Anas_discors	m	1	2.9	Vol		388.7	PMA 89.57.35	Royal Alberta Museum				unknown	This study (Andrew Iwaniuk unpublished data)
Anseriformes	Anatidae	Anas	eatoni		Anas_eatoni	m	1	3.4	Vol		455	MV B11097	Museum Victoria				unknown	This study (Andrew Iwaniuk unpublished data)
Anseriformes	Anatidae	Anas	flavirostris	flavirostris	Anas_flavirostris	f	1	3.15	Vol		395	USNM489480	National Museum of Natural History				unknown	This study (Andrew Iwaniuk unpublished data)
Anseriformes	Anatidae	Anas	flavirostris	flavirostris	Anas_flavirostris	f	1	2.91	Vol		434	USNM490862	National Museum of Natural History				unknown	This study (Andrew Iwaniuk unpublished data)
Anseriformes	Anatidae	Anas	flavirostris	flavirostris	Anas_flavirostris	m	1	4	Vol		414	USNM489481	National Museum of Natural History				unknown	This study (Andrew Iwaniuk unpublished data)
Anseriformes	Anatidae	Anas	flavirostris	flavirostris	Anas_flavirostris	m	1	3.8	Vol		475	USNM490863	National Museum of Natural History				unknown	This study (Andrew Iwaniuk unpublished data)
Anseriformes	Anatidae	Anas	fulvigula	fulvigula	Anas_fulvigula	f	1	4.97	Vol		659	FLMNH 40728	Florida Museum of Natural History				unknown	This study (Andrew Iwaniuk unpublished data)
Anseriformes	Anatidae	Anas	georgica	spinicauda	Anas_georgica	f	1	3.46	Vol		619	FLMNH 39353	Florida Museum of Natural History				unknown	This study (Andrew Iwaniuk unpublished data)
Anseriformes	Anatidae	Anas	georgica	spinicauda	Anas_georgica	m	1	4.54	Vol		770	FLMNH 39339	Florida Museum of Natural History				unknown	This study (Andrew Iwaniuk unpublished data)
Anseriformes	Anatidae	Anas	gracilis		Anas_gracilis	f	1	3.7	Vol		560	ANWC22441	Australian National Wildlife Collection				unknown	This study (Andrew Iwaniuk unpublished data)
Anseriformes	Anatidae	Anas	gracilis		Anas_gracilis	f	1	3.1	Vol		370	ANWC22459	Australian National Wildlife Collection				unknown	This study (Andrew Iwaniuk unpublished data)
Anseriformes	Anatidae	Anas	gracilis		Anas_gracilis	f	1	3.18	Vol		311	SAM B49558	South Australian Museum				unknown	This study (Andrew Iwaniuk unpublished data)
Anseriformes	Anatidae	Anas	gracilis		Anas_gracilis	m	1	3.55	Vol		440	ANWC22442	Australian National Wildlife Collection				unknown	This study (Andrew Iwaniuk unpublished data)
Anseriformes	Anatidae	Anas	gracilis		Anas_gracilis	m	1	3.86	Vol		550	ANWC22447	Australian National Wildlife Collection				unknown	This study (Andrew Iwaniuk unpublished data)
Anseriformes	Anatidae	Anas	gracilis		Anas_gracilis	m	1	3.77	Vol		300	ANWC22448	Australian National Wildlife Collection				unknown	This study (Andrew Iwaniuk unpublished data)
Anseriformes	Anatidae	Anas	gracilis		Anas_gracilis	m	1	3.3	Vol		470	ANWC22455	Australian National Wildlife Collection				unknown	This study (Andrew Iwaniuk unpublished data)
Anseriformes	Anatidae	Anas	gracilis		Anas_gracilis	m	1	3.8	Vol		420	ANWC22456	Australian National Wildlife Collection				unknown	This study (Andrew Iwaniuk unpublished data)
Anseriformes	Anatidae	Anas	gracilis		Anas_gracilis	m	1	3.81	Vol		579	MV B16053	Museum Victoria				unknown	This study (Andrew Iwaniuk unpublished data)
Anseriformes	Anatidae	Anas	gracilis		Anas_gracilis	m	1	3.89	Vol		590	MV B20244	Museum Victoria				unknown	This study (Andrew Iwaniuk unpublished data)
Anseriformes	Anatidae	Anas	hottentota		Anas_hottentota	f	1	2.27	Vol		235	FMNH 360031	Field Museum of Natural History				unknown	This study (Andrew Iwaniuk unpublished data)
Anseriformes	Anatidae	Anas	hottentota		Anas_hottentota	m	1	2.51	Vol		250	FMNH 360028	Field Museum of Natural History				unknown	This study (Andrew Iwaniuk unpublished data)
Anseriformes	Anatidae	Anas	hottentota		Anas_hottentota	m	1	2.55	Vol		225	FMNH 360029	Field Museum of Natural History				unknown	This study (Andrew Iwaniuk unpublished data)
Anseriformes	Anatidae	Anas	hottentota		Anas_hottentota	m	1	2.85	Vol		240	FMNH 360030	Field Museum of Natural History				unknown	This study (Andrew Iwaniuk unpublished data)
Anseriformes	Anatidae	Anas	laysanensis		Anas_laysanensis	f	1	3.45	Vol		475.4	USNM608119	National Museum of Natural History				unknown	This study (Andrew Iwaniuk unpublished data)
Anseriformes	Anatidae	Anas	laysanensis		Anas_laysanensis	f	1	3.4	Vol		393.3	USNM611802	National Museum of Natural History				unknown	This study (Andrew Iwaniuk unpublished data)
Anseriformes	Anatidae	Anas	laysanensis		Anas_laysanensis	f	1	3.5	Vol		498.6	USNM611803	National Museum of Natural History				unknown	This study (Andrew Iwaniuk unpublished data)
Anseriformes	Anatidae	Anas	laysanensis		Anas_laysanensis	f	1	3.6	Vol		452.8	USNM611805	National Museum of Natural History				unknown	This study (Andrew Iwaniuk unpublished data)
Anseriformes	Anatidae	Anas	laysanensis		Anas_laysanensis	f	1	3.4	Vol		445.3	USNM611806	National Museum of Natural History				unknown	This study (Andrew Iwaniuk unpublished data)
Anseriformes	Anatidae	Anas	laysanensis		Anas_laysanensis	f	1	3.4	Vol		445.2	USNM611807	National Museum of Natural History				unknown	This study (Andrew Iwaniuk unpublished data)
Anseriformes	Anatidae	Anas	melleri		Anas_melleri	f	1	5.42	Vol		1050	FMNH 360027	Field Museum of Natural History				unknown	This study (Andrew Iwaniuk unpublished data)
Anseriformes	Anatidae	Anas	penelope		Anas_penelope	f	1	3.77	Vol		730	UAM DDG1768	Museum of University of Alaska Fairbanks				unknown	This study (Andrew Iwaniuk unpublished data)
Anseriformes	Anatidae	Anas	penelope		Anas_penelope	m	1	4.13	Vol		346.2	ROM 100382	Royal Ontario Museum				unknown	This study (Andrew Iwaniuk unpublished data)
Anseriformes	Anatidae	Anas	penelope		Anas_penelope	m	1		Mass	4.103	678	HoBR Not registered	House of Bird Research collection	9-22-2012	Egholm, DK	54.56N 10,29E	Adult	This study (Johannes Erritzøe House of Bird Research collection)
Anseriformes	Anatidae	Anas	penelope		Anas_penelope	m	1		Mass	3.856	752	HoBR Not registered	House of Bird Research collection	11-3-2000	Bredebro, DK	55.04N 08.49E	Adult	This study (Johannes Erritzøe House of Bird Research collection)
Anseriformes	Anatidae	Anas	penelope		Anas_penelope	m	1		Mass	4.469	947	HoBR Not registered	House of Bird Research collection	12-16-2000	Ribe, DK	55.20N 08.46E	Adult	This study (Johannes Erritzøe House of Bird Research collection)
Anseriformes	Anatidae	Anas	penelope		Anas_penelope	m	1		Mass	4.118	904	HoBR Not registered	House of Bird Research collection	12-27-2001	Ribe, DK	55.20N 08.46E	Adult	This study (Johannes Erritzøe House of Bird Research collection)
Anseriformes	Anatidae	Anas	penelope		Anas_penelope	m	1		Mass	4.26	712.5	HoBR Not registered	House of Bird Research collection				Adult	This study (Johannes Erritzøe House of Bird Research collection)
Anseriformes	Anatidae	Anas	platalea		Anas_platalea	f	1	3.45	Vol		480	USNM614574	National Museum of Natural History				unknown	This study (Andrew Iwaniuk unpublished data)
Anseriformes	Anatidae	Anas	platalea		Anas_platalea	m	1	2.97	Vol		590	FMNH 339040	Field Museum of Natural History				unknown	This study (Andrew Iwaniuk unpublished data)
Anseriformes	Anatidae	Anas	platalea		Anas_platalea	m	1	3.55	Vol		610	USNM614572	National Museum of Natural History				unknown	This study (Andrew Iwaniuk unpublished data)
Anseriformes	Anatidae	Anas	platyrhynchos	platyrhynchos	Anas_platyrhynchos	f	1	6.23	Vol		988.2	CMN S-2826	Canadian Museum of Nature				unknown	This study (Andrew Iwaniuk unpublished data)
Anseriformes	Anatidae	Anas	platyrhynchos	platyrhynchos	Anas_platyrhynchos	f	1	5.27	Vol		983	CMNH S-12021	Carnegir Museum of Natural History				unknown	This study (Andrew Iwaniuk unpublished data)
Anseriformes	Anatidae	Anas	platyrhynchos	platyrhynchos	Anas_platyrhynchos	f	1	5.48	Vol		1051	CMNH S-13929	Carnegir Museum of Natural History				unknown	This study (Andrew Iwaniuk unpublished data)
Anseriformes	Anatidae	Anas	platyrhynchos	platyrhynchos	Anas_platyrhynchos	f	1	5.51	Vol		1048	CMNH S-14308	Carnegir Museum of Natural History				unknown	This study (Andrew Iwaniuk unpublished data)
Anseriformes	Anatidae	Anas	platyrhynchos	platyrhynchos	Anas_platyrhynchos	f	1	4.8	Vol		1114.4	PMA Z84.66.18	Royal Alberta Museum				unknown	This study (Andrew Iwaniuk unpublished data)
Anseriformes	Anatidae	Anas	platyrhynchos	platyrhynchos	Anas_platyrhynchos	f	1	5.1	Vol		967.5	PMA Z86.17.11	Royal Alberta Museum				unknown	This study (Andrew Iwaniuk unpublished data)
Anseriformes	Anatidae	Anas	platyrhynchos	platyrhynchos	Anas_platyrhynchos	f	1	4.8	Vol		948.6	PMA Z86.18.16	Royal Alberta Museum				unknown	This study (Andrew Iwaniuk unpublished data)
Anseriformes	Anatidae	Anas	platyrhynchos	platyrhynchos	Anas_platyrhynchos	f	1	5.9	Vol		1108.6	PMA Z87.18.10	Royal Alberta Museum				unknown	This study (Andrew Iwaniuk unpublished data)
Anseriformes	Anatidae	Anas	platyrhynchos	platyrhynchos	Anas_platyrhynchos	f	1	5.5	Vol		1104.3	PMA Z88.15.2	Royal Alberta Museum				unknown	This study (Andrew Iwaniuk unpublished data)
Anseriformes	Anatidae	Anas	platyrhynchos	platyrhynchos	Anas_platyrhynchos	f	1		Mass	5.44	1200	HoBR Not registered	House of Bird Research collection				Adult	This study (Johannes Erritzøe House of Bird Research collection)
Anseriformes	Anatidae	Anas	platyrhynchos	platyrhynchos	Anas_platyrhynchos	m	1	5.7	Vol		1242.3	CMN S-7651	Canadian Museum of Nature				unknown	This study (Andrew Iwaniuk unpublished data)
Anseriformes	Anatidae	Anas	platyrhynchos	platyrhynchos	Anas_platyrhynchos	m	1	6.4	Vol		1237	CMNH S-13902	Carnegir Museum of Natural History				unknown	This study (Andrew Iwaniuk unpublished data)
Anseriformes	Anatidae	Anas	platyrhynchos	platyrhynchos	Anas_platyrhynchos	m	1	5.8	Vol		1224	PMA Z82.75.1	Royal Alberta Museum				unknown	This study (Andrew Iwaniuk unpublished data)
Anseriformes	Anatidae	Anas	platyrhynchos	platyrhynchos	Anas_platyrhynchos	m	1	6	Vol		1208.4	PMA Z86.17.10	Royal Alberta Museum				unknown	This study (Andrew Iwaniuk unpublished data)
Anseriformes	Anatidae	Anas	platyrhynchos	platyrhynchos	Anas_platyrhynchos	m	1	5.6	Vol		1227	PMA Z87.18.9	Royal Alberta Museum				unknown	This study (Andrew Iwaniuk unpublished data)
Anseriformes	Anatidae	Anas	platyrhynchos	platyrhynchos	Anas_platyrhynchos	m	1	5.6	Vol		1109.9	PMA Z87.27.45	Royal Alberta Museum				unknown	This study (Andrew Iwaniuk unpublished data)
Anseriformes	Anatidae	Anas	platyrhynchos	platyrhynchos	Anas_platyrhynchos	m	1	5.3	Vol		1092	PMA Z88.15.1	Royal Alberta Museum				unknown	This study (Andrew Iwaniuk unpublished data)
Anseriformes	Anatidae	Anas	platyrhynchos	platyrhynchos	Anas_platyrhynchos	m	1		Mass	6.41	1305	HoBR Not registered	House of Bird Research collection	11-4-2000	Egholm, DK	54.56N 10.29E	Adult	This study (Johannes Erritzøe House of Bird Research collection)
Anseriformes	Anatidae	Anas	platyrhynchos	platyrhynchos	Anas_platyrhynchos	m	1		Mass	5.926	1435	HoBR Not registered	House of Bird Research collection	11-25-2000	Fovslet, DK	55.25N 09.28E	Adult	This study (Johannes Erritzøe House of Bird Research collection)
Anseriformes	Anatidae	Anas	platyrhynchos	platyrhynchos	Anas_platyrhynchos	m	1		Mass	4.916	1354	HoBR Not registered	House of Bird Research collection	11-16-2004	Svanemosen, DK	55.25N 09.40E	Adult	This study (Johannes Erritzøe House of Bird Research collection)
Anseriformes	Anatidae	Anas	platyrhynchos	platyrhynchos	Anas_platyrhynchos	m	1		Mass	6.153	1031	HoBR Not registered	House of Bird Research collection	12-xx-1993	Kolding, DK	55.29N 09.28E	Adult	This study (Johannes Erritzøe House of Bird Research collection)
Anseriformes	Anatidae	Anas	platyrhynchos	platyrhynchos	Anas_platyrhynchos	m	1		Mass	5.046	1570	HoBR Not registered	House of Bird Research collection	12-30-1997	Kolding, DK,	55.29N 09.28E	Adult	This study (Johannes Erritzøe House of Bird Research collection)
Anseriformes	Anatidae	Anas	platyrhynchos	platyrhynchos	Anas_platyrhynchos	m	1		Mass	6.748	1180	HoBR Not registered	House of Bird Research collection	10-23-2012	Tunø, DK	55.57N 10.26E	Adult	This study (Johannes Erritzøe House of Bird Research collection)
Anseriformes	Anatidae	Anas	platyrhynchos	platyrhynchos	Anas_platyrhynchos	m	1		Mass	5.85	1105	HoBR Not registered	House of Bird Research collection				Adult	This study (Johannes Erritzøe House of Bird Research collection)
Anseriformes	Anatidae	Anas	platyrhynchos	platyrhynchos	Anas_platyrhynchos	m	1		Mass	6.8	1150	HoBR Not registered	House of Bird Research collection				Adult	This study (Johannes Erritzøe House of Bird Research collection)
Anseriformes	Anatidae	Anas	platyrhynchos	platyrhynchos	Anas_platyrhynchos	m	1		Mass	5.68	1200	HoBR Not registered	House of Bird Research collection				Adult	This study (Johannes Erritzøe House of Bird Research collection)
Anseriformes	Anatidae	Anas	platyrhynchos	platyrhynchos	Anas_platyrhynchos	m	1		Mass	6.28	1380	HoBR Not registered	House of Bird Research collection				Adult	This study (Johannes Erritzøe House of Bird Research collection)
Anseriformes	Anatidae	Anas	platyrhynchos	platyrhynchos	Anas_platyrhynchos	m	1		Mass	5.8	1440	HoBR Not registered	House of Bird Research collection				Adult	This study (Johannes Erritzøe House of Bird Research collection)
Anseriformes	Anatidae	Anas	querquedula		Anas_querquedula	f	1	2.58	Vol		285	UMMNH 224969	University of Michigan Museum of Natural History				unknown	This study (Andrew Iwaniuk unpublished data)
Anseriformes	Anatidae	Anas	querquedula		Anas_querquedula	m	1	2.78	Vol		262	FMNH 369208	Field Museum of Natural History				unknown	This study (Andrew Iwaniuk unpublished data)
Anseriformes	Anatidae	Anas	querquedula		Anas_querquedula	m	1	2.69	Vol		305	UMMNH 207418	University of Michigan Museum of Natural History				unknown	This study (Andrew Iwaniuk unpublished data)
Anseriformes	Anatidae	Anas	querquedula		Anas_querquedula	m	1	3.03	Vol		342	UMMNH 207421	University of Michigan Museum of Natural History				unknown	This study (Andrew Iwaniuk unpublished data)
Anseriformes	Anatidae	Anas	rhynchotis	rhynchotis	Anas_rhynchotis	f	1	3.24	Vol		620	ANWC22517	Australian National Wildlife Collection				unknown	This study (Andrew Iwaniuk unpublished data)
Anseriformes	Anatidae	Anas	rhynchotis	rhynchotis	Anas_rhynchotis	f	1	3.2	Vol		580	ANWC22519	Australian National Wildlife Collection				unknown	This study (Andrew Iwaniuk unpublished data)
Anseriformes	Anatidae	Anas	rhynchotis	rhynchotis	Anas_rhynchotis	f	1	3.24	Vol		470	MV B20431	Museum Victoria				unknown	This study (Andrew Iwaniuk unpublished data)
Anseriformes	Anatidae	Anas	rhynchotis	rhynchotis	Anas_rhynchotis	m	1	3.6	Vol		620	ANWC22516	Australian National Wildlife Collection				unknown	This study (Andrew Iwaniuk unpublished data)
Anseriformes	Anatidae	Anas	rhynchotis	rhynchotis	Anas_rhynchotis	m	1	3.8	Vol		660	ANWC22523	Australian National Wildlife Collection				unknown	This study (Andrew Iwaniuk unpublished data)
Anseriformes	Anatidae	Anas	rhynchotis	rhynchotis	Anas_rhynchotis	m	1	3.92	Vol		786	MV B20292	Museum Victoria				unknown	This study (Andrew Iwaniuk unpublished data)
Anseriformes	Anatidae	Anas	rhynchotis	variegata	Anas_rhynchotis	f	1	3.15	Vol		555	MONZ 24589	Museum of New Zealand Te Papa Tongarewa				unknown	This study (Andrew Iwaniuk unpublished data)
Anseriformes	Anatidae	Anas	rubripes		Anas_rubripes	unknown	1		Mass	7.25	853						Adult	Hrdlicka A (1905) Brain Weight in Vertebrates
Anseriformes	Anatidae	Anas	smithii		Anas_smithii	f	1	3.7	Vol		820	USNM558439	National Museum of Natural History				unknown	This study (Andrew Iwaniuk unpublished data)
Anseriformes	Anatidae	Anas	smithii		Anas_smithii	f	1	3.75	Vol		839	USNM558440	National Museum of Natural History				unknown	This study (Andrew Iwaniuk unpublished data)
Anseriformes	Anatidae	Anas	smithii		Anas_smithii	m	1	3.8	Vol		850	USNM558436	National Museum of Natural History				unknown	This study (Andrew Iwaniuk unpublished data)
Anseriformes	Anatidae	Anas	smithii		Anas_smithii	m	1	3.85	Vol		627	USNM558437	National Museum of Natural History				unknown	This study (Andrew Iwaniuk unpublished data)
Anseriformes	Anatidae	Anas	smithii		Anas_smithii	m	1	3.8	Vol		825	USNM558438	National Museum of Natural History				unknown	This study (Andrew Iwaniuk unpublished data)
Anseriformes	Anatidae	Anas	sparsa		Anas_sparsa	m	1	6.32	Vol		1000	AMNH 23325	Amrcian Museum of Natural History				unknown	This study (Andrew Iwaniuk unpublished data)
Anseriformes	Anatidae	Anas	strepera		Anas_strepera	f	1	4.53	Vol		665	FMNH 428916	Field Museum of Natural History				unknown	This study (Andrew Iwaniuk unpublished data)
Anseriformes	Anatidae	Anas	strepera		Anas_strepera	f	1	3.8	Vol		828.4	PMA Z81.118.1	Royal Alberta Museum				unknown	This study (Andrew Iwaniuk unpublished data)
Anseriformes	Anatidae	Anas	strepera		Anas_strepera	f	1	3.9	Vol		955.2	PMA Z81.118.2	Royal Alberta Museum				unknown	This study (Andrew Iwaniuk unpublished data)
Anseriformes	Anatidae	Anas	strepera		Anas_strepera	f	1	3.84	Vol		931.5	PMA Z81.138.1	Royal Alberta Museum				unknown	This study (Andrew Iwaniuk unpublished data)
Anseriformes	Anatidae	Anas	strepera		Anas_strepera	f	1	3.8	Vol		977.7	PMA Z82.84.1	Royal Alberta Museum				unknown	This study (Andrew Iwaniuk unpublished data)
Anseriformes	Anatidae	Anas	strepera		Anas_strepera	f	1	3.3	Vol		516.6	PMA Z90.17.17	Royal Alberta Museum				unknown	This study (Andrew Iwaniuk unpublished data)
Anseriformes	Anatidae	Anas	strepera		Anas_strepera	m	1	4.4	Vol		940.6	PMA Z81.87.7	Royal Alberta Museum				unknown	This study (Andrew Iwaniuk unpublished data)
Anseriformes	Anatidae	Anas	strepera		Anas_strepera	m	1	4	Vol		911.4	PMA Z81.89.2	Royal Alberta Museum				unknown	This study (Andrew Iwaniuk unpublished data)
Anseriformes	Anatidae	Anas	strepera		Anas_strepera	m	1	4.1	Vol		1055.9	PMA Z82.89.1	Royal Alberta Museum				unknown	This study (Andrew Iwaniuk unpublished data)
Anseriformes	Anatidae	Anas	strepera		Anas_strepera	m	1	4	Vol		1033.6	PMA Z87.31.5	Royal Alberta Museum				unknown	This study (Andrew Iwaniuk unpublished data)
Anseriformes	Anatidae	Anas	strepera		Anas_strepera	m	1	4	Vol		744.3	PMA Z90.35.43	Royal Alberta Museum				unknown	This study (Andrew Iwaniuk unpublished data)
Anseriformes	Anatidae	Anas	superciliosa	pelewensis	Anas_superciliosa	f	1	3.71	Vol		515	BM 42523	Burke Museum of Natural History				unknown	This study (Andrew Iwaniuk unpublished data)
Anseriformes	Anatidae	Anas	superciliosa	pelewensis	Anas_superciliosa	f	1	3.84	Vol		622	BM 42529	Burke Museum of Natural History				unknown	This study (Andrew Iwaniuk unpublished data)
Anseriformes	Anatidae	Anas	superciliosa	pelewensis	Anas_superciliosa	f	1	3.49	Vol		485	BM 42530	Burke Museum of Natural History				unknown	This study (Andrew Iwaniuk unpublished data)
Anseriformes	Anatidae	Anas	superciliosa	pelewensis	Anas_superciliosa	m	1	4.05	Vol		660	BM 42489	Burke Museum of Natural History				unknown	This study (Andrew Iwaniuk unpublished data)
Anseriformes	Anatidae	Anas	superciliosa	pelewensis	Anas_superciliosa	m	1	4.33	Vol		635	BM 42619	Burke Museum of Natural History				unknown	This study (Andrew Iwaniuk unpublished data)
Anseriformes	Anatidae	Anas	superciliosa	pelewensis	Anas_superciliosa	m	1	4.3	Vol		590	BM 58685	Burke Museum of Natural History				unknown	This study (Andrew Iwaniuk unpublished data)
Anseriformes	Anatidae	Anas	superciliosa	pelewensis	Anas_superciliosa	m	1	4.56	Vol		762	BM 63077	Burke Museum of Natural History				unknown	This study (Andrew Iwaniuk unpublished data)
Anseriformes	Anatidae	Anas	superciliosa	rogersi	Anas_superciliosa	f	1	5.3	Vol		1000	ANWC22530	Australian National Wildlife Collection				unknown	This study (Andrew Iwaniuk unpublished data)
Anseriformes	Anatidae	Anas	superciliosa	rogersi	Anas_superciliosa	f	1	5.4	Vol		860	ANWC22538	Australian National Wildlife Collection				unknown	This study (Andrew Iwaniuk unpublished data)
Anseriformes	Anatidae	Anas	superciliosa	rogersi	Anas_superciliosa	f	1	4.93	Vol		940	MV B20379	Museum Victoria				unknown	This study (Andrew Iwaniuk unpublished data)
Anseriformes	Anatidae	Anas	superciliosa	rogersi	Anas_superciliosa	f	1	5.22	Vol		725	QM O.27904	Queensland Museum				unknown	This study (Andrew Iwaniuk unpublished data)
Anseriformes	Anatidae	Anas	superciliosa	rogersi	Anas_superciliosa	f	1	4.57	Vol		605	QM O.28041	Queensland Museum				unknown	This study (Andrew Iwaniuk unpublished data)
Anseriformes	Anatidae	Anas	superciliosa	rogersi	Anas_superciliosa	f	1	5.22	Vol		1200	SAM B45872	South Australian Museum				unknown	This study (Andrew Iwaniuk unpublished data)
Anseriformes	Anatidae	Anas	superciliosa	rogersi	Anas_superciliosa	f	1	5.19	Vol		1080	SAM B45878	South Australian Museum				unknown	This study (Andrew Iwaniuk unpublished data)
Anseriformes	Anatidae	Anas	superciliosa	rogersi	Anas_superciliosa	m	1	5.3	Vol		1100	ANWC22529	Australian National Wildlife Collection				unknown	This study (Andrew Iwaniuk unpublished data)
Anseriformes	Anatidae	Anas	superciliosa	rogersi	Anas_superciliosa	m	1	5.2	Vol		1080	ANWC22533	Australian National Wildlife Collection				unknown	This study (Andrew Iwaniuk unpublished data)
Anseriformes	Anatidae	Anas	superciliosa	rogersi	Anas_superciliosa	m	1	5.8	Vol		1100	ANWC22534	Australian National Wildlife Collection				unknown	This study (Andrew Iwaniuk unpublished data)
Anseriformes	Anatidae	Anas	superciliosa	rogersi	Anas_superciliosa	m	1	5.75	Vol		1240	ANWC22543	Australian National Wildlife Collection				unknown	This study (Andrew Iwaniuk unpublished data)
Anseriformes	Anatidae	Anas	superciliosa	rogersi	Anas_superciliosa	m	1	5.3	Vol		1260	ANWC22544	Australian National Wildlife Collection				unknown	This study (Andrew Iwaniuk unpublished data)
Anseriformes	Anatidae	Anas	superciliosa	rogersi	Anas_superciliosa	m	1	5.68	Vol		820	QM O.27917	Queensland Museum				unknown	This study (Andrew Iwaniuk unpublished data)
Anseriformes	Anatidae	Anas	superciliosa	rogersi	Anas_superciliosa	m	1	6.28	Vol		1300	SAM B45877	South Australian Museum				unknown	This study (Andrew Iwaniuk unpublished data)
Anseriformes	Anatidae	Anas	undulata	undulata	Anas_undulata	m	1	5.4	Vol		950	BM 53135	Burke Museum of Natural History				unknown	This study (Andrew Iwaniuk unpublished data)
Anseriformes	Anatidae	Anas	versicolor	puna	Anas_versicolor	f	1	3.16	Vol		447	FLMNH39338	Florida Museum of Natural History				unknown	This study (Andrew Iwaniuk unpublished data)
Anseriformes	Anatidae	Anas	versicolor	puna	Anas_versicolor	f	1	3.5	Vol		450	USNM614576	National Museum of Natural History				unknown	This study (Andrew Iwaniuk unpublished data)
Anseriformes	Anatidae	Anas	versicolor	puna	Anas_versicolor	f	1	3.4	Vol		380	USNM614578	National Museum of Natural History				unknown	This study (Andrew Iwaniuk unpublished data)
Anseriformes	Anatidae	Anas	versicolor	puna	Anas_versicolor	m	1	3.8	Vol		360	USNM614577	National Museum of Natural History				unknown	This study (Andrew Iwaniuk unpublished data)
Anseriformes	Anatidae	Anas	wyvilliana		Anas_wyvilliana	f	1	4.3	Vol		445.1	USNM611799	National Museum of Natural History				unknown	This study (Andrew Iwaniuk unpublished data)
Anseriformes	Anatidae	Anas	wyvilliana		Anas_wyvilliana	f	1	4.15	Vol		472.6	USNM611800	National Museum of Natural History				unknown	This study (Andrew Iwaniuk unpublished data)
Anseriformes	Anatidae	Anas	wyvilliana		Anas_wyvilliana	f	1	4.8	Vol		465	USNM611801	National Museum of Natural History				unknown	This study (Andrew Iwaniuk unpublished data)
Anseriformes	Anatidae	Anas	wyvilliana		Anas_wyvilliana	m	1	4.2	Vol		449.5	USNM611791	National Museum of Natural History				unknown	This study (Andrew Iwaniuk unpublished data)
Anseriformes	Anatidae	Anas	wyvilliana		Anas_wyvilliana	m	1	4.8	Vol		716.4	USNM611794	National Museum of Natural History				unknown	This study (Andrew Iwaniuk unpublished data)
Anseriformes	Anatidae	Anas	wyvilliana		Anas_wyvilliana	m	1	4.8	Vol		560.3	USNM611795	National Museum of Natural History				unknown	This study (Andrew Iwaniuk unpublished data)
Anseriformes	Anatidae	Anas	wyvilliana		Anas_wyvilliana	m	1	5.15	Vol		560	USNM611796	National Museum of Natural History				unknown	This study (Andrew Iwaniuk unpublished data)
Anseriformes	Anatidae	Anas	wyvilliana		Anas_wyvilliana	m	1	4.8	Vol		560.7	USNM611797	National Museum of Natural History				unknown	This study (Andrew Iwaniuk unpublished data)
Anseriformes	Anatidae	Anser	albifrons	flavirostris	Anser_albifrons	m	1	7.29	Vol		1250	ROM 128162	Royal Ontario Museum				unknown	This study (Andrew Iwaniuk unpublished data)
Anseriformes	Anatidae	Anser	albifrons	frontalis	Anser_albifrons	f	1	9.07	Vol		2310	BM 37496	Burke Museum of Natural History				unknown	This study (Andrew Iwaniuk unpublished data)
Anseriformes	Anatidae	Anser	albifrons	frontalis	Anser_albifrons	f	1	8.1	Vol		2466	PMA Z74.4.3	Royal Alberta Museum				unknown	This study (Andrew Iwaniuk unpublished data)
Anseriformes	Anatidae	Anser	albifrons	frontalis	Anser_albifrons	f	1	9.2	Vol		2765.2	PMA Z86.18.2	Royal Alberta Museum				unknown	This study (Andrew Iwaniuk unpublished data)
Anseriformes	Anatidae	Anser	albifrons	frontalis	Anser_albifrons	f	1	9.32	Vol		2768	PMA Z86.18.6	Royal Alberta Museum				unknown	This study (Andrew Iwaniuk unpublished data)
Anseriformes	Anatidae	Anser	albifrons	frontalis	Anser_albifrons	f	1	8.8	Vol		1950	ROM 156113	Royal Ontario Museum				unknown	This study (Andrew Iwaniuk unpublished data)
Anseriformes	Anatidae	Anser	albifrons	frontalis	Anser_albifrons	m	1	9.1	Vol		2610	PMA Z80.43.56	Royal Alberta Museum				unknown	This study (Andrew Iwaniuk unpublished data)
Anseriformes	Anatidae	Anser	albifrons	frontalis	Anser_albifrons	m	1	8.9	Vol		2792.3	PMA Z86.17.4	Royal Alberta Museum				unknown	This study (Andrew Iwaniuk unpublished data)
Anseriformes	Anatidae	Anser	albifrons	frontalis	Anser_albifrons	m	1	9.6	Vol		3340.7	PMA Z86.18.1	Royal Alberta Museum				unknown	This study (Andrew Iwaniuk unpublished data)
Anseriformes	Anatidae	Anser	albifrons	frontalis	Anser_albifrons	m	1	10.21	Vol		3006.9	PMA Z86.18.8	Royal Alberta Museum				unknown	This study (Andrew Iwaniuk unpublished data)
Anseriformes	Anatidae	Anser	albifrons	frontalis	Anser_albifrons	m	1	10.11	Vol		2140.5	PMA Z87.31.20	Royal Alberta Museum				unknown	This study (Andrew Iwaniuk unpublished data)
Anseriformes	Anatidae	Anser	albifrons	frontalis	Anser_albifrons	m	1	10.73	Vol		2000	ROM 126678	Royal Ontario Museum				unknown	This study (Andrew Iwaniuk unpublished data)
Anseriformes	Anatidae	Anser	anser	anser	Anser_anser	m	1		Mass	12.72	4000	HoBR Not registered	House of Bird Research collection	11-30-2008	Egholm, Marstal, DK	54.51N 10,31E	unknown	This study (Johannes Erritzøe House of Bird Research collection)
Anseriformes	Anatidae	Anser	anser	anser	Anser_anser	m	1		Mass	13.216	3900	HoBR Not registered	House of Bird Research collection	11-25-2009	Nyborg, DK	55.19N 10.48E	Adult	This study (Johannes Erritzøe House of Bird Research collection)
Anseriformes	Anatidae	Anser	anser		Anser_anser	f	1		Mass	11.913	5000	HoBR Not registered	House of Bird Research collection	11-22-2002	Egholm, Marstal, DK	54.51N 10.31E	Adult	This study (Johannes Erritzøe House of Bird Research collection)
Anseriformes	Anatidae	Anser	anser		Anser_anser	m	1		Mass	10.25	4000	HoBR273726	House of Bird Research collection	10-4-1994	Nørre Nebel, DK	55.47N 08.18E	Adult	This study (Johannes Erritzøe House of Bird Research collection)
Anseriformes	Anatidae	Anser	erythropus		Anser_erythropus	f	1	6.81	Vol		1198.6	ROM 104049	Royal Ontario Museum				unknown	This study (Andrew Iwaniuk unpublished data)
Anseriformes	Anatidae	Anser	fabalis	fabalis	Anser_fabalis	f	1	11.26	Vol		3190	ZMUC collection	Zoological Museum at University of Copenhagen				unknown	This study (Andrew Iwaniuk unpublished data)
Anseriformes	Anatidae	Anser	fabalis	fabalis	Anser_fabalis	m	1	10.77	Vol		3561	ZMUC collection	Zoological Museum at University of Copenhagen				unknown	This study (Andrew Iwaniuk unpublished data)
Anseriformes	Anatidae	Anser	fabalis	fabalis	Anser_fabalis	m	1	11.98	Vol		3668	ZMUC collection	Zoological Museum at University of Copenhagen				unknown	This study (Andrew Iwaniuk unpublished data)
Anseriformes	Anatidae	Anser	fabalis	rossicus	Anser_fabalis	f	1	10.8	Vol		1710	USNM554121	National Museum of Natural History				unknown	This study (Andrew Iwaniuk unpublished data)
Anseriformes	Anatidae	Anser	fabalis	rossicus	Anser_fabalis	m	1	10.22	Vol		1760	UMMNH 224173	University of Michigan Museum of Natural History				unknown	This study (Andrew Iwaniuk unpublished data)
Anseriformes	Anatidae	Anser	fabalis		Anser_fabalis	m	1	10.9	Vol		2380	USNM620505	National Museum of Natural History				unknown	This study (Andrew Iwaniuk unpublished data)
Anseriformes	Anatidae	Anser	fabalis		Anser_fabalis	m	1	10.1	Vol		2415	USNM620506	National Museum of Natural History				unknown	This study (Andrew Iwaniuk unpublished data)
Anseriformes	Anatidae	Anser	indicus		Anser_indicus	f	1	8.24	Vol		2177	FMNH 360131	Field Museum of Natural History				unknown	This study (Andrew Iwaniuk unpublished data)
Anseriformes	Anatidae	Aythya	affinis		Aythya_affinis	f	1	4.45	Vol		650	FMNH 363989	Field Museum of Natural History				unknown	This study (Andrew Iwaniuk unpublished data)
Anseriformes	Anatidae	Aythya	affinis		Aythya_affinis	f	1	4.2	Vol		828.5	PMA Z82.73.15	Royal Alberta Museum				unknown	This study (Andrew Iwaniuk unpublished data)
Anseriformes	Anatidae	Aythya	affinis		Aythya_affinis	f	1	4.3	Vol		701.8	PMA Z89.30.12	Royal Alberta Museum				unknown	This study (Andrew Iwaniuk unpublished data)
Anseriformes	Anatidae	Aythya	affinis		Aythya_affinis	f	1	4	Vol		767.4	PMA Z90.35.42	Royal Alberta Museum				unknown	This study (Andrew Iwaniuk unpublished data)
Anseriformes	Anatidae	Aythya	affinis		Aythya_affinis	m	1	4.2	Vol		617	PMA Z80.74.1	Royal Alberta Museum				unknown	This study (Andrew Iwaniuk unpublished data)
Anseriformes	Anatidae	Aythya	affinis		Aythya_affinis	m	1	3.9	Vol		786	PMA Z81.135.1	Royal Alberta Museum				unknown	This study (Andrew Iwaniuk unpublished data)
Anseriformes	Anatidae	Aythya	affinis		Aythya_affinis	m	1	4	Vol		750.8	PMA Z83.12.15	Royal Alberta Museum				unknown	This study (Andrew Iwaniuk unpublished data)
Anseriformes	Anatidae	Aythya	affinis		Aythya_affinis	m	1	4.7	Vol		711.8	PMA Z83.29.74	Royal Alberta Museum				unknown	This study (Andrew Iwaniuk unpublished data)
Anseriformes	Anatidae	Aythya	affinis		Aythya_affinis	m	1	4.2	Vol		694.1	PMA Z84.22.1	Royal Alberta Museum				unknown	This study (Andrew Iwaniuk unpublished data)
Anseriformes	Anatidae	Aythya	americana		Aythya_americana	f	1	4.87	Vol		575	ANWC22593	Australian National Wildlife Collection				unknown	This study (Andrew Iwaniuk unpublished data)
Anseriformes	Anatidae	Aythya	americana		Aythya_americana	f	1	4.41	Vol		585.6	CMN S-3286	Canadian Museum of Nature				unknown	This study (Andrew Iwaniuk unpublished data)
Anseriformes	Anatidae	Aythya	americana		Aythya_americana	f	1	5	Vol		979.7	PMA Z72.102.7	Royal Alberta Museum				unknown	This study (Andrew Iwaniuk unpublished data)
Anseriformes	Anatidae	Aythya	americana		Aythya_americana	f	1	4.63	Vol		733.8	ROM107676	Royal Ontario Museum				unknown	This study (Andrew Iwaniuk unpublished data)
Anseriformes	Anatidae	Aythya	americana		Aythya_americana	m	1	5.58	Vol		997	CMN S-3286	Canadian Museum of Nature				unknown	This study (Andrew Iwaniuk unpublished data)
Anseriformes	Anatidae	Aythya	americana		Aythya_americana	m	1	5.4	Vol		656	PMA Z79.101.51	Royal Alberta Museum				unknown	This study (Andrew Iwaniuk unpublished data)
Anseriformes	Anatidae	Aythya	americana		Aythya_americana	m	1	5.3	Vol		799.5	PMA Z85.9.28	Royal Alberta Museum				unknown	This study (Andrew Iwaniuk unpublished data)
Anseriformes	Anatidae	Aythya	americana		Aythya_americana	m	1	5.82	Vol		1136	SNM17705	Sam Noble Museum, University of Oklahoma				unknown	This study (Andrew Iwaniuk unpublished data)
Anseriformes	Anatidae	Aythya	australis		Aythya_australis	f	1	4.76	Vol		820	MV B19291	Museum Victoria				unknown	This study (Andrew Iwaniuk unpublished data)
Anseriformes	Anatidae	Aythya	australis		Aythya_australis	f	1	4.9	Vol		820	MV B19291	Museum Victoria				unknown	This study (Andrew Iwaniuk unpublished data)
Anseriformes	Anatidae	Aythya	collaris		Aythya_collaris	f	1	4.5	Vol		548	ANWC22596	Australian National Wildlife Collection				unknown	This study (Andrew Iwaniuk unpublished data)
Anseriformes	Anatidae	Aythya	collaris		Aythya_collaris	f	1	4.5	Vol		548	ANWC22596	Australian National Wildlife Collection				unknown	This study (Andrew Iwaniuk unpublished data)
Anseriformes	Anatidae	Aythya	collaris		Aythya_collaris	f	1	4.5	Vol		835	FMNH347632	Field Museum of Natural History				unknown	This study (Andrew Iwaniuk unpublished data)
Anseriformes	Anatidae	Aythya	collaris		Aythya_collaris	f	1	4.27	Vol		508	FMNH363327	Field Museum of Natural History				unknown	This study (Andrew Iwaniuk unpublished data)
Anseriformes	Anatidae	Aythya	collaris		Aythya_collaris	m	1	4.97	Vol		920	FMNH347633	Field Museum of Natural History				unknown	This study (Andrew Iwaniuk unpublished data)
Anseriformes	Anatidae	Aythya	collaris		Aythya_collaris	m	1	4.91	Vol		421	RBCM23675	Royal British Columbia Museum				unknown	This study (Andrew Iwaniuk unpublished data)
Anseriformes	Anatidae	Aythya	ferina		Aythya_ferina	m	1		Mass	5.95	899.9	HoBR273995	House of Bird Research collection	2-11-1996			Adult	This study (Johannes Erritzøe House of Bird Research collection)
Anseriformes	Anatidae	Aythya	ferina		Aythya_ferina	m	1		Mass	5.566	669.5	HoBR273996	House of Bird Research collection	2-11-1996			Adult	This study (Johannes Erritzøe House of Bird Research collection)
Anseriformes	Anatidae	Aythya	ferina		Aythya_ferina	m	1		Mass	6.074	770	HoBR274002	House of Bird Research collection	2-15-1996			Adult	This study (Johannes Erritzøe House of Bird Research collection)
Anseriformes	Anatidae	Aythya	ferina		Aythya_ferina	m	1		Mass	6.147	1118	HoBR Not registered	House of Bird Research collection	11-xx-2004			Adult	This study (Johannes Erritzøe House of Bird Research collection)
Anseriformes	Anatidae	Aythya	ferina		Aythya_ferina	m	1		Mass	5.75	704	HoBR Not registered	House of Bird Research collection				Adult	This study (Johannes Erritzøe House of Bird Research collection)
Anseriformes	Anatidae	Aythya	ferina		Aythya_ferina	m	1		Mass	5.05	811	HoBR Not registered	House of Bird Research collection				Adult	This study (Johannes Erritzøe House of Bird Research collection)
Anseriformes	Anatidae	Aythya	ferina		Aythya_ferina	m	1		Mass	5.43	898	HoBR Not registered	House of Bird Research collection				Adult	This study (Johannes Erritzøe House of Bird Research collection)
Anseriformes	Anatidae	Aythya	fuligula		Aythya_fuligula	f	1	4.53	Vol		910	FMNH56544	Field Museum of Natural History				unknown	This study (Andrew Iwaniuk unpublished data)
Anseriformes	Anatidae	Aythya	fuligula		Aythya_fuligula	f	1	4.13	Vol		750	ROM103371	Royal Ontario Museum				unknown	This study (Andrew Iwaniuk unpublished data)
Anseriformes	Anatidae	Aythya	fuligula		Aythya_fuligula	m	1		Mass	4.457	755	HoBR Not registered	House of Bird Research collection	1-30-2007	Junghoved, Præstø, DK	55.05N 12.07E	Adult	This study (Johannes Erritzøe House of Bird Research collection)
Anseriformes	Anatidae	Aythya	fuligula		Aythya_fuligula	m	1		Mass	4.16	1050	HoBR Not registered	House of Bird Research collection		Roskilde Fjord, DK	55.41N 11.10E	Adult	This study (Johannes Erritzøe House of Bird Research collection)
Anseriformes	Anatidae	Aythya	fuligula		Aythya_fuligula	m	1		Mass	4.756	705	HoBR Not registered	House of Bird Research collection	3-20-2010	Copenhagen, DK	55.41N 12.31E	Adult	This study (Johannes Erritzøe House of Bird Research collection)
Anseriformes	Anatidae	Aythya	fuligula		Aythya_fuligula	m	1		Mass	4.16	637	HoBR Not registered	House of Bird Research collection				Adult	This study (Johannes Erritzøe House of Bird Research collection)
Anseriformes	Anatidae	Aythya	marila	marila	Aythya_marila	f	1	4.82	Vol		1211	ZMUC collection	Zoological Museum at University of Copenhagen				unknown	This study (Andrew Iwaniuk unpublished data)
Anseriformes	Anatidae	Aythya	marila	mariloides	Aythya_marila	f	1	5.13	Vol		826	CMNH S-13486	Carnegir Museum of Natural History				unknown	This study (Andrew Iwaniuk unpublished data)
Anseriformes	Anatidae	Aythya	marila	mariloides	Aythya_marila	m	1	5.7	Vol		1078	CMNH S-14454	Carnegir Museum of Natural History				unknown	This study (Andrew Iwaniuk unpublished data)
Anseriformes	Anatidae	Aythya	marila	mariloides	Aythya_marila	m	1	6.08	Vol		673.5	ROM117558	Royal Ontario Museum				unknown	This study (Andrew Iwaniuk unpublished data)
Anseriformes	Anatidae	Aythya	marila		Aythya_marila	f	1		Mass	4.7859	787	CQ28			Churchill, Canada		unknown	Crile G and Quiring DP (1940) Ohio J Sci 40:219-259.
Anseriformes	Anatidae	Aythya	novaeseelandiae		Aythya_novaeseelandiae	f	1	4.2	Vol		520	MONZ24245	Museum of New Zealand Te Papa Tongarewa				unknown	This study (Andrew Iwaniuk unpublished data)
Anseriformes	Anatidae	Aythya	novaeseelandiae		Aythya_novaeseelandiae	m	1	4.17	Vol		485	MONZ26746	Museum of New Zealand Te Papa Tongarewa				unknown	This study (Andrew Iwaniuk unpublished data)
Anseriformes	Anatidae	Aythya	novaeseelandiae		Aythya_novaeseelandiae	m	1	4.51	Vol		655	MONZ27245	Museum of New Zealand Te Papa Tongarewa				unknown	This study (Andrew Iwaniuk unpublished data)
Anseriformes	Anatidae	Aythya	novaeseelandiae		Aythya_novaeseelandiae	m	1	4.38	Vol		550	MV B19895	Museum Victoria				unknown	This study (Andrew Iwaniuk unpublished data)
Anseriformes	Anatidae	Aythya	nyroca		Aythya_nyroca	m	1		Mass	4.512	391.25	HoBR345916	House of Bird Research collection	6-3-2009	captivity		Adult	This study (Johannes Erritzøe House of Bird Research collection)
Anseriformes	Anatidae	Aythya	nyroca		Aythya_nyroca	m	1		Mass	4.419	271.8	HoBR354036	House of Bird Research collection		captivity		unknown	This study (Johannes Erritzøe House of Bird Research collection)
Anseriformes	Anatidae	Aythya	sp.		Aythya_sp.	m	1		Mass	5.569	956	HoBR Not registered	House of Bird Research collection	10-1-2002	Roskilde Fjord, DK	55.41N 11.10E	Adult	This study (Johannes Erritzøe House of Bird Research collection)
Anseriformes	Anatidae	Aythya	valisineria		Aythya_valisineria	f	1	6.86	Vol		725	ANWC22590	Australian National Wildlife Collection				unknown	This study (Andrew Iwaniuk unpublished data)
Anseriformes	Anatidae	Aythya	valisineria		Aythya_valisineria	f	1	6.44	Vol		1053.5	BM31684	Burke Museum of Natural History				unknown	This study (Andrew Iwaniuk unpublished data)
Anseriformes	Anatidae	Aythya	valisineria		Aythya_valisineria	f	1	6.62	Vol		1152.5	PMA 86.17.12	Royal Alberta Museum				unknown	This study (Andrew Iwaniuk unpublished data)
Anseriformes	Anatidae	Aythya	valisineria		Aythya_valisineria	m	1	7.15	Vol		787	ANWC22589	Australian National Wildlife Collection				unknown	This study (Andrew Iwaniuk unpublished data)
Anseriformes	Anatidae	Aythya	valisineria		Aythya_valisineria	m	1	7.3	Vol		1183.4	PMA 83.62.51	Royal Alberta Museum				unknown	This study (Andrew Iwaniuk unpublished data)
Anseriformes	Anatidae	Biziura	lobata		Biziura_lobata	f	1	7.2	Vol		1950	MV B19229	Museum Victoria				unknown	This study (Andrew Iwaniuk unpublished data)
Anseriformes	Anatidae	Biziura	lobata		Biziura_lobata	m	1	9.6	Vol		1992.6	MONZ27503	Museum of New Zealand Te Papa Tongarewa				unknown	This study (Andrew Iwaniuk unpublished data)
Anseriformes	Anatidae	Biziura	lobata		Biziura_lobata	m	1	9.7	Vol		1992.6	MV B17530	Museum Victoria				unknown	This study (Andrew Iwaniuk unpublished data)
Anseriformes	Anatidae	Branta	bernicla	bernicla	Branta_bernicla	f	1		Mass	6.069	980	HoBR338479	House of Bird Research collection	10-26-2007	near Egholm, Marstal, DK	54.51N 10.31E	Adult	This study (Johannes Erritzøe House of Bird Research collection)
Anseriformes	Anatidae	Branta	bernicla	hrota	Branta_bernicla	f	1	4.69	Vol		995	BM36974	Burke Museum of Natural History				unknown	This study (Andrew Iwaniuk unpublished data)
Anseriformes	Anatidae	Branta	bernicla	hrota	Branta_bernicla	f	1	5.77	Vol		1370	BM37072	Burke Museum of Natural History				unknown	This study (Andrew Iwaniuk unpublished data)
Anseriformes	Anatidae	Branta	bernicla	hrota	Branta_bernicla	f	1	6.11	Vol		1425	BM37199	Burke Museum of Natural History				unknown	This study (Andrew Iwaniuk unpublished data)
Anseriformes	Anatidae	Branta	bernicla	hrota	Branta_bernicla	f	1	5.8	Vol		860	USNM501613	National Museum of Natural History				unknown	This study (Andrew Iwaniuk unpublished data)
Anseriformes	Anatidae	Branta	bernicla	hrota	Branta_bernicla	f	1	6.4	Vol		700	USNM501615	National Museum of Natural History				unknown	This study (Andrew Iwaniuk unpublished data)
Anseriformes	Anatidae	Branta	bernicla	hrota	Branta_bernicla	f	1	5.25	Vol		807.8	ROM126726	Royal Ontario Museum				unknown	This study (Andrew Iwaniuk unpublished data)
Anseriformes	Anatidae	Branta	bernicla	hrota	Branta_bernicla	m	1	6.05	Vol		1210	BM36968	Burke Museum of Natural History				unknown	This study (Andrew Iwaniuk unpublished data)
Anseriformes	Anatidae	Branta	bernicla	hrota	Branta_bernicla	m	1	5.82	Vol		1200	BM36971	Burke Museum of Natural History				unknown	This study (Andrew Iwaniuk unpublished data)
Anseriformes	Anatidae	Branta	bernicla	hrota	Branta_bernicla	m	1	6.49	Vol		1295	BM37200	Burke Museum of Natural History				unknown	This study (Andrew Iwaniuk unpublished data)
Anseriformes	Anatidae	Branta	bernicla	hrota	Branta_bernicla	m	1	6.2	Vol		1080	USNM501611	National Museum of Natural History				unknown	This study (Andrew Iwaniuk unpublished data)
Anseriformes	Anatidae	Branta	bernicla	hrota	Branta_bernicla	m	1	6.3	Vol		1090	USNM501612	National Museum of Natural History				unknown	This study (Andrew Iwaniuk unpublished data)
Anseriformes	Anatidae	Branta	bernicla	hrota	Branta_bernicla	m	1	6.55	Vol		1125	USNM501614	National Museum of Natural History				unknown	This study (Andrew Iwaniuk unpublished data)
Anseriformes	Anatidae	Branta	bernicla	nigricans	Branta_bernicla	f	1	5.77	Vol		1306.82	BNHM53971	Barkeley Natural History Museums				unknown	This study (Andrew Iwaniuk unpublished data)
Anseriformes	Anatidae	Branta	bernicla	nigricans	Branta_bernicla	f	1	5.91	Vol		1435	USNM627747	National Museum of Natural History				unknown	This study (Andrew Iwaniuk unpublished data)
Anseriformes	Anatidae	Branta	bernicla	nigricans	Branta_bernicla	m	1	5.65	Vol		805.6	BNHM160649	Barkeley Natural History Museums				unknown	This study (Andrew Iwaniuk unpublished data)
Anseriformes	Anatidae	Branta	bernicla	nigricans	Branta_bernicla	m	1	6.07	Vol		1398	BNHM160649	Barkeley Natural History Museums				unknown	This study (Andrew Iwaniuk unpublished data)
Anseriformes	Anatidae	Branta	bernicla	nigricans	Branta_bernicla	m	1	6.31	Vol		1430	BNHM160649	Barkeley Natural History Museums				unknown	This study (Andrew Iwaniuk unpublished data)
Anseriformes	Anatidae	Branta	bernicla	nigricans	Branta_bernicla	m	1	6.05	Vol		1475	USNM622203	National Museum of Natural History				unknown	This study (Andrew Iwaniuk unpublished data)
Anseriformes	Anatidae	Branta	bernicla	nigricans	Branta_bernicla	m	1	6.77	Vol		1650	USNM622204	National Museum of Natural History				unknown	This study (Andrew Iwaniuk unpublished data)
Anseriformes	Anatidae	Branta	bernicla		Branta_bernicla	m	1		Mass	6.041	1340	HoBR314544	House of Bird Research collection	11-3-2001	Egholm, Marstal, DK	54.51N 10.31E	Adult	This study (Johannes Erritzøe House of Bird Research collection)
Anseriformes	Anatidae	Branta	bernicla		Branta_bernicla	m	1		Mass	6.041	1340	HoBR314544	House of Bird Research collection	11-3-2001	Egholm, Marstal, DK	54.51N 10.31E	Adult	This study (Johannes Erritzøe House of Bird Research collection)
Anseriformes	Anatidae	Branta	bernicla		Branta_bernicla	m	1		Mass	6.22	1580	HoBR235133	House of Bird Research collection	11-4-1989	Tinglev, DK	54.55N 09.14E	Adult	This study (Johannes Erritzøe House of Bird Research collection)
Anseriformes	Anatidae	Branta	canadensis	interior	Branta_canadensis	f	1	10.97	Vol		3409.09	ROM127343	Royal Ontario Museum				unknown	This study (Andrew Iwaniuk unpublished data)
Anseriformes	Anatidae	Branta	canadensis	interior	Branta_canadensis	f	1	11.43	Vol		3000	ROM140004	Royal Ontario Museum				unknown	This study (Andrew Iwaniuk unpublished data)
Anseriformes	Anatidae	Branta	canadensis	interior	Branta_canadensis	f	1	12.18	Vol		4090.91	ROM149452	Royal Ontario Museum				unknown	This study (Andrew Iwaniuk unpublished data)
Anseriformes	Anatidae	Branta	canadensis	interior	Branta_canadensis	m	1	13.1	Vol		3500	ROM139935	Royal Ontario Museum				unknown	This study (Andrew Iwaniuk unpublished data)
Anseriformes	Anatidae	Branta	canadensis	interior	Branta_canadensis	m	1	13.18	Vol		4750	ROM148841	Royal Ontario Museum				unknown	This study (Andrew Iwaniuk unpublished data)
Anseriformes	Anatidae	Branta	canadensis	maxima	Branta_canadensis	f	1	11.29	Vol		2907	FMNH395677	Field Museum of Natural History				unknown	This study (Andrew Iwaniuk unpublished data)
Anseriformes	Anatidae	Branta	canadensis	maxima	Branta_canadensis	f	1	10.39	Vol		4772.73	ROM140143	Royal Ontario Museum				unknown	This study (Andrew Iwaniuk unpublished data)
Anseriformes	Anatidae	Branta	canadensis	maxima	Branta_canadensis	f	1	10.97	Vol		3600	ROM148807	Royal Ontario Museum				unknown	This study (Andrew Iwaniuk unpublished data)
Anseriformes	Anatidae	Branta	canadensis	maxima	Branta_canadensis	f	1	11.12	Vol		4150	ROM148808	Royal Ontario Museum				unknown	This study (Andrew Iwaniuk unpublished data)
Anseriformes	Anatidae	Branta	canadensis	maxima	Branta_canadensis	f	1	10.22	Vol		3400	ROM152220	Royal Ontario Museum				unknown	This study (Andrew Iwaniuk unpublished data)
Anseriformes	Anatidae	Branta	canadensis	maxima	Branta_canadensis	m	1	14.39	Vol		4068.8	ROM106298	Royal Ontario Museum				unknown	This study (Andrew Iwaniuk unpublished data)
Anseriformes	Anatidae	Branta	canadensis	maxima	Branta_canadensis	m	1	12.93	Vol		4772.73	ROM148777	Royal Ontario Museum				unknown	This study (Andrew Iwaniuk unpublished data)
Anseriformes	Anatidae	Branta	canadensis	maxima	Branta_canadensis	m	1	12.64	Vol		4280	ROM148802	Royal Ontario Museum				unknown	This study (Andrew Iwaniuk unpublished data)
Anseriformes	Anatidae	Branta	canadensis	maxima	Branta_canadensis	m	1	12.88	Vol		3700	ROM148803	Royal Ontario Museum				unknown	This study (Andrew Iwaniuk unpublished data)
Anseriformes	Anatidae	Branta	canadensis	moffitti	Branta_canadensis	f	1	11.4	Vol		1801	PMA Z85.24.25	Royal Alberta Museum				unknown	This study (Andrew Iwaniuk unpublished data)
Anseriformes	Anatidae	Branta	canadensis	moffitti	Branta_canadensis	f	1	11.77	Vol		2409.2	PMA Z85.24.26	Royal Alberta Museum				unknown	This study (Andrew Iwaniuk unpublished data)
Anseriformes	Anatidae	Branta	canadensis	moffitti	Branta_canadensis	f	1	10.7	Vol		3466.9	PMA Z86.17.2	Royal Alberta Museum				unknown	This study (Andrew Iwaniuk unpublished data)
Anseriformes	Anatidae	Branta	canadensis	moffitti	Branta_canadensis	f	1	10.34	Vol		3934	PMA Z86.18.12	Royal Alberta Museum				unknown	This study (Andrew Iwaniuk unpublished data)
Anseriformes	Anatidae	Branta	canadensis	moffitti	Branta_canadensis	f	1	10.8	Vol		3902	PMA Z86.27.1	Royal Alberta Museum				unknown	This study (Andrew Iwaniuk unpublished data)
Anseriformes	Anatidae	Branta	canadensis	moffitti	Branta_canadensis	f	1	11.17	Vol		3939	PMA Z86.27.3	Royal Alberta Museum				unknown	This study (Andrew Iwaniuk unpublished data)
Anseriformes	Anatidae	Branta	canadensis	moffitti	Branta_canadensis	m	1	12.4	Vol		4211	PMA Z78.8.95	Royal Alberta Museum				unknown	This study (Andrew Iwaniuk unpublished data)
Anseriformes	Anatidae	Branta	canadensis	moffitti	Branta_canadensis	m	1	12.1	Vol		3920.3	PMA Z81.89.3	Royal Alberta Museum				unknown	This study (Andrew Iwaniuk unpublished data)
Anseriformes	Anatidae	Branta	canadensis	moffitti	Branta_canadensis	m	1	11.93	Vol		5020.2	PMA Z85.24.22	Royal Alberta Museum				unknown	This study (Andrew Iwaniuk unpublished data)
Anseriformes	Anatidae	Branta	canadensis	moffitti	Branta_canadensis	m	1	11.7	Vol		3274.8	PMA Z85.24.23	Royal Alberta Museum				unknown	This study (Andrew Iwaniuk unpublished data)
Anseriformes	Anatidae	Branta	canadensis	moffitti	Branta_canadensis	m	1	12.54	Vol		3083.9	PMA Z85.24.24	Royal Alberta Museum				unknown	This study (Andrew Iwaniuk unpublished data)
Anseriformes	Anatidae	Branta	canadensis	occidentalis	Branta_canadensis	f	1	9.85	Vol		3300	UAM4854	Museum of University of Alaska Fairbanks				unknown	This study (Andrew Iwaniuk unpublished data)
Anseriformes	Anatidae	Branta	canadensis	occidentalis	Branta_canadensis	f	1	9.33	Vol		2690	UAM4858	Museum of University of Alaska Fairbanks				unknown	This study (Andrew Iwaniuk unpublished data)
Anseriformes	Anatidae	Branta	canadensis	occidentalis	Branta_canadensis	m	1	11.22	Vol		3450	UAM4858	Museum of University of Alaska Fairbanks				unknown	This study (Andrew Iwaniuk unpublished data)
Anseriformes	Anatidae	Branta	canadensis	occidentalis	Branta_canadensis	m	1	10.37	Vol		3590	UAM4960	Museum of University of Alaska Fairbanks				unknown	This study (Andrew Iwaniuk unpublished data)
Anseriformes	Anatidae	Branta	canadensis	occidentalis	Branta_canadensis	m	1	9.99	Vol		3810	UAM4973	Museum of University of Alaska Fairbanks				unknown	This study (Andrew Iwaniuk unpublished data)
Anseriformes	Anatidae	Branta	canadensis	parvipes	Branta_canadensis	m	1	10.3	Vol		2500	ROM126677	Royal Ontario Museum				unknown	This study (Andrew Iwaniuk unpublished data)
Anseriformes	Anatidae	Branta	hutchinsii	hutchinsii	Branta_hutchinsii	m	1	6.1	Vol		1491	ROM103135	Royal Ontario Museum				unknown	This study (Andrew Iwaniuk unpublished data)
Anseriformes	Anatidae	Branta	hutchinsii	hutchinsii	Branta_hutchinsii	m	1	9.08	Vol		2350	ROM151336	Royal Ontario Museum				unknown	This study (Andrew Iwaniuk unpublished data)
Anseriformes	Anatidae	Branta	hutchinsii	hutchinsii	Branta_hutchinsii	m	1	8.34	Vol		2350	ROM151343	Royal Ontario Museum				unknown	This study (Andrew Iwaniuk unpublished data)
Anseriformes	Anatidae	Branta	hutchinsii	minima	Branta_hutchinsii	f	1	6.17	Vol		1213.3	ROM103136	Royal Ontario Museum				unknown	This study (Andrew Iwaniuk unpublished data)
Anseriformes	Anatidae	Branta	hutchinsii	minima	Branta_hutchinsii	f	1	5.54	Vol		1098.5	ROM103137	Royal Ontario Museum				unknown	This study (Andrew Iwaniuk unpublished data)
Anseriformes	Anatidae	Branta	hutchinsii	minima	Branta_hutchinsii	f	1	7.39	Vol		1312.9	ROM148818	Royal Ontario Museum				unknown	This study (Andrew Iwaniuk unpublished data)
Anseriformes	Anatidae	Branta	hutchinsii	minima	Branta_hutchinsii	m	1	6.28	Vol		1704	ROM103138	Royal Ontario Museum				unknown	This study (Andrew Iwaniuk unpublished data)
Anseriformes	Anatidae	Branta	hutchinsii	taverneri	Branta_hutchinsii	f	1	8.3	Vol		1717	USNM430285	National Museum of Natural History				unknown	This study (Andrew Iwaniuk unpublished data)
Anseriformes	Anatidae	Branta	hutchinsii	taverneri	Branta_hutchinsii	f	1	8.8	Vol		2081	USNM430287	National Museum of Natural History				unknown	This study (Andrew Iwaniuk unpublished data)
Anseriformes	Anatidae	Branta	hutchinsii	taverneri	Branta_hutchinsii	m	1	9.8	Vol		2083	USNM430286	National Museum of Natural History				unknown	This study (Andrew Iwaniuk unpublished data)
Anseriformes	Anatidae	Branta	leucopsis		Branta_leucopsis	f	1	7.12	Vol		2145	FMNH365019	Field Museum of Natural History				unknown	This study (Andrew Iwaniuk unpublished data)
Anseriformes	Anatidae	Branta	leucopsis		Branta_leucopsis	f	1		Mass	6.751	1770	HoBR314336	House of Bird Research collection	11-4-2000	Egholm, Marstal, DK	54.51N 10.31E	Adult	This study (Johannes Erritzøe House of Bird Research collection)
Anseriformes	Anatidae	Branta	leucopsis		Branta_leucopsis	f	1		Mass	6.6	1940	HoBR Not registered	House of Bird Research collection				Adult	This study (Johannes Erritzøe House of Bird Research collection)
Anseriformes	Anatidae	Branta	leucopsis		Branta_leucopsis	m	1		Mass	7.072	2180	HoBR353391	House of Bird Research collection	5-13-2010	Manø, DK	55.20N 08.30E	Adult	This study (Johannes Erritzøe House of Bird Research collection)
Anseriformes	Anatidae	Branta	leucopsis		Branta_leucopsis	m	1		Mass	6.98	2300	HoBR235147	House of Bird Research collection	11-xx-1989	Henne Strand, DK	55.43N 08.17E	unknown	This study (Johannes Erritzøe House of Bird Research collection)
Anseriformes	Anatidae	Bucephala	albeola		Bucephala_albeola	f	1	3.58	Vol		397	FMNH356991	Field Museum of Natural History				unknown	This study (Andrew Iwaniuk unpublished data)
Anseriformes	Anatidae	Bucephala	albeola		Bucephala_albeola	f	1	3.3	Vol		289.7	PMA 89.57.19	Royal Alberta Museum				unknown	This study (Andrew Iwaniuk unpublished data)
Anseriformes	Anatidae	Bucephala	albeola		Bucephala_albeola	m	1	4.39	Vol		553	ANWC22625	Australian National Wildlife Collection				unknown	This study (Andrew Iwaniuk unpublished data)
Anseriformes	Anatidae	Bucephala	albeola		Bucephala_albeola	m	1	4.41	Vol		543	CMNH S-13765	Carnegir Museum of Natural History				unknown	This study (Andrew Iwaniuk unpublished data)
Anseriformes	Anatidae	Bucephala	albeola		Bucephala_albeola	m	1	4.47	Vol		650	FMNH360624	Field Museum of Natural History				unknown	This study (Andrew Iwaniuk unpublished data)
Anseriformes	Anatidae	Bucephala	albeola		Bucephala_albeola	m	1	3.8	Vol		393.7	PMA 83.28.1	Royal Alberta Museum				unknown	This study (Andrew Iwaniuk unpublished data)
Anseriformes	Anatidae	Bucephala	albeola		Bucephala_albeola	m	1	4	Vol		416	PMA 83.28.3	Royal Alberta Museum				unknown	This study (Andrew Iwaniuk unpublished data)
Anseriformes	Anatidae	Bucephala	clangula	americana	Bucephala_clangula	f	1	5.77	Vol		652.5	FMNH360625	Field Museum of Natural History				unknown	This study (Andrew Iwaniuk unpublished data)
Anseriformes	Anatidae	Bucephala	clangula	americana	Bucephala_clangula	f	1	5.2	Vol		606.6	PMA Z89.57.17	Royal Alberta Museum				unknown	This study (Andrew Iwaniuk unpublished data)
Anseriformes	Anatidae	Bucephala	clangula	americana	Bucephala_clangula	f	1	5.3	Vol		854.2	PMA71.97.6	Royal Alberta Museum				unknown	This study (Andrew Iwaniuk unpublished data)
Anseriformes	Anatidae	Bucephala	clangula	americana	Bucephala_clangula	f	1	5.3	Vol		806.1	PMA79.41.1	Royal Alberta Museum				unknown	This study (Andrew Iwaniuk unpublished data)
Anseriformes	Anatidae	Bucephala	clangula	americana	Bucephala_clangula	m	1	6.31	Vol		1165	CMNH S-13827	Carnegir Museum of Natural History				unknown	This study (Andrew Iwaniuk unpublished data)
Anseriformes	Anatidae	Bucephala	clangula	americana	Bucephala_clangula	m	1	6.23	Vol		1103	CMNH S-13828	Carnegir Museum of Natural History				unknown	This study (Andrew Iwaniuk unpublished data)
Anseriformes	Anatidae	Bucephala	clangula	americana	Bucephala_clangula	m	1	5.76	Vol		1087	CMNH S-13899	Carnegir Museum of Natural History				unknown	This study (Andrew Iwaniuk unpublished data)
Anseriformes	Anatidae	Bucephala	clangula	americana	Bucephala_clangula	m	1	6.4	Vol		941.8	PMA Z81.51.1	Royal Alberta Museum				unknown	This study (Andrew Iwaniuk unpublished data)
Anseriformes	Anatidae	Bucephala	clangula	americana	Bucephala_clangula	m	1	6.7	Vol		779.8	PMA Z84.47.22	Royal Alberta Museum				unknown	This study (Andrew Iwaniuk unpublished data)
Anseriformes	Anatidae	Bucephala	clangula	americana	Bucephala_clangula	m	1	6.8	Vol		1001.3	PMA Z85.9.34	Royal Alberta Museum				unknown	This study (Andrew Iwaniuk unpublished data)
Anseriformes	Anatidae	Bucephala	clangula	americana	Bucephala_clangula	m	1	6.2	Vol		1225.7	PMA Z89.29.22	Royal Alberta Museum				unknown	This study (Andrew Iwaniuk unpublished data)
Anseriformes	Anatidae	Bucephala	clangula	americana	Bucephala_clangula	m	1	6.69	Vol		1049	ROM93460	Royal Ontario Museum				unknown	This study (Andrew Iwaniuk unpublished data)
Anseriformes	Anatidae	Bucephala	clangula	clangula	Bucephala_clangula	f	1		Mass	5.33	580	HoBR Not registered	House of Bird Research collection	5-24-2006	Bagsværd, DK	55.47N 12.29E	Adult	This study (Johannes Erritzøe House of Bird Research collection)
Anseriformes	Anatidae	Bucephala	clangula	clangula	Bucephala_clangula	m	1	6.26	Vol		1114	ZMUC collection	Zoological Museum at University of Copenhagen				unknown	This study (Andrew Iwaniuk unpublished data)
Anseriformes	Anatidae	Bucephala	clangula	clangula	Bucephala_clangula	m	1		Mass	5.4	1053	HoBR Not registered	House of Bird Research collection	1994	Nordborg, DK	55.04N 09.45E	Adult	This study (Johannes Erritzøe House of Bird Research collection)
Anseriformes	Anatidae	Bucephala	clangula	clangula	Bucephala_clangula	m	1		Mass	6.283	1750	HoBR Not registered	House of Bird Research collection	1-31-2007	Junghoved, Præstø, DK	55.05N 12.07E	Adult	This study (Johannes Erritzøe House of Bird Research collection)
Anseriformes	Anatidae	Bucephala	clangula	clangula	Bucephala_clangula	m	1		Mass	6.14	1038	HoBR Not registered	House of Bird Research collection	1-xx-1997	Lillebælt, DK	55.09N 09.48E	Adult	This study (Johannes Erritzøe House of Bird Research collection)
Anseriformes	Anatidae	Bucephala	clangula	clangula	Bucephala_clangula	m	1		Mass	6.459	870	HoBR Not registered	House of Bird Research collection	11-1-2002	Roskilde Fjord, DK	55.41N 11.10E	Adult	This study (Johannes Erritzøe House of Bird Research collection)
Anseriformes	Anatidae	Bucephala	clangula	clangula	Bucephala_clangula	m	1		Mass	5.4	768	HoBR Not registered	House of Bird Research collection				Adult	This study (Johannes Erritzøe House of Bird Research collection)
Anseriformes	Anatidae	Bucephala	islandica		Bucephala_islandica	f	1	5.54	Vol		827.1	BM33317	Burke Museum of Natural History				unknown	This study (Andrew Iwaniuk unpublished data)
Anseriformes	Anatidae	Bucephala	islandica		Bucephala_islandica	f	1	5.4	Vol		680.6	PMA Z93.12.11	Royal Alberta Museum				unknown	This study (Andrew Iwaniuk unpublished data)
Anseriformes	Anatidae	Bucephala	islandica		Bucephala_islandica	m	1	6.6	Vol		1186	PMA 80.9.112	Royal Alberta Museum				unknown	This study (Andrew Iwaniuk unpublished data)
Anseriformes	Anatidae	Cairina	moschata		Cairina_moschata	f	1	6.63	Vol		2600	ANWC22414	Australian National Wildlife Collection				unknown	This study (Andrew Iwaniuk unpublished data)
Anseriformes	Anatidae	Cairina	moschata		Cairina_moschata	f	1	7.2	Vol		1550	USNM637168	National Museum of Natural History				unknown	This study (Andrew Iwaniuk unpublished data)
Anseriformes	Anatidae	Cairina	moschata		Cairina_moschata	m	1	7.45	Vol		2200	ANWC22412	Australian National Wildlife Collection				unknown	This study (Andrew Iwaniuk unpublished data)
Anseriformes	Anatidae	Cairina	moschata		Cairina_moschata	m	1	8.33	Vol		3100	ANWC22413	Australian National Wildlife Collection				unknown	This study (Andrew Iwaniuk unpublished data)
Anseriformes	Anatidae	Cairina	moschata		Cairina_moschata	m	1	8.28	Vol		2650	USNM622299	National Museum of Natural History				unknown	This study (Andrew Iwaniuk unpublished data)
Anseriformes	Anatidae	Callonetta	leucophrys		Callonetta_leucophrys	f	1	2.82	Vol		347	LA93191					unknown	This study (Andrew Iwaniuk unpublished data)
Anseriformes	Anatidae	Callonetta	leucophrys		Callonetta_leucophrys	f	1	2.75	Vol		307	LA93192					unknown	This study (Andrew Iwaniuk unpublished data)
Anseriformes	Anatidae	Callonetta	leucophrys		Callonetta_leucophrys	f	1		Mass	2.855	328.668	HoBR354038	House of Bird Research collection		captivity		Adult	This study (Johannes Erritzøe House of Bird Research collection)
Anseriformes	Anatidae	Callonetta	leucophrys		Callonetta_leucophrys	f	1		Mass	2.364	223.698	HoBR Not registered	House of Bird Research collection	1-5-2008	captivity		Adult	This study (Johannes Erritzøe House of Bird Research collection)
Anseriformes	Anatidae	Callonetta	leucophrys		Callonetta_leucophrys	m	1	3.12	Vol		365	LA93190					unknown	This study (Andrew Iwaniuk unpublished data)
Anseriformes	Anatidae	Callonetta	leucophrys		Callonetta_leucophrys	m	1		Mass	2.966	265.573	HoBR354057	House of Bird Research collection		captivity		Adult	This study (Johannes Erritzøe House of Bird Research collection)
Anseriformes	Anatidae	Callonetta	leucophrys		Callonetta_leucophrys	m	1		Mass	3.075	227.354	HoBR Not registered	House of Bird Research collection		captivity		unknown	This study (Johannes Erritzøe House of Bird Research collection)
Anseriformes	Anatidae	Cereopsis	novaehollandiae		Cereopsis_novaehollandiae	f	1	8.8	Vol		3409	MV B10905	Museum Victoria				unknown	This study (Andrew Iwaniuk unpublished data)
Anseriformes	Anatidae	Chen	caerulescens	caerulescens	Chen_caerulescens	f	1	10.89	Vol		2125	PMA Z83.5.2	Royal Alberta Museum				unknown	This study (Andrew Iwaniuk unpublished data)
Anseriformes	Anatidae	Chen	caerulescens	caerulescens	Chen_caerulescens	f	1	11.44	Vol		2155	ROM128668	Royal Ontario Museum				unknown	This study (Andrew Iwaniuk unpublished data)
Anseriformes	Anatidae	Chen	caerulescens	caerulescens	Chen_caerulescens	m	1	13.31	Vol		2268	FMNH356982	Field Museum of Natural History				unknown	This study (Andrew Iwaniuk unpublished data)
Anseriformes	Anatidae	Chen	caerulescens	caerulescens	Chen_caerulescens	m	1	10.73	Vol		2177	FMNH365017	Field Museum of Natural History				unknown	This study (Andrew Iwaniuk unpublished data)
Anseriformes	Anatidae	Chen	caerulescens	caerulescens	Chen_caerulescens	m	1	11	Vol		1983.1	PMA 84.21.3	Royal Alberta Museum				unknown	This study (Andrew Iwaniuk unpublished data)
Anseriformes	Anatidae	Chen	caerulescens	caerulescens	Chen_caerulescens	m	1	11.52	Vol		2495	ROM128667	Royal Ontario Museum				unknown	This study (Andrew Iwaniuk unpublished data)
Anseriformes	Anatidae	Chen	caerulescens		Chen_caerulescens	f	1	9.2	Vol		1945	PMA Z80.119.3	Royal Alberta Museum				unknown	This study (Andrew Iwaniuk unpublished data)
Anseriformes	Anatidae	Chen	caerulescens		Chen_caerulescens	f	1	10.3	Vol		2134.8	PMA Z90.46.1	Royal Alberta Museum				unknown	This study (Andrew Iwaniuk unpublished data)
Anseriformes	Anatidae	Chen	canagica		Chen_canagica	m	1	8.64	Vol		1750	FLMNH23279	Florida Museum of Natural History				unknown	This study (Andrew Iwaniuk unpublished data)
Anseriformes	Anatidae	Chen	canagica		Chen_canagica	m	1	9.38	Vol		2570	UAM10100	Museum of University of Alaska Fairbanks				unknown	This study (Andrew Iwaniuk unpublished data)
Anseriformes	Anatidae	Chen	rossii		Chen_rossii	f	1	6.6	Vol		2036	USNM288085	National Museum of Natural History				unknown	This study (Andrew Iwaniuk unpublished data)
Anseriformes	Anatidae	Chenonetta	jubata		Chenonetta_jubata	f	1	3.8	Vol		620	ANWC22427	Australian National Wildlife Collection				unknown	This study (Andrew Iwaniuk unpublished data)
Anseriformes	Anatidae	Chenonetta	jubata		Chenonetta_jubata	f	1	3.8	Vol		780	ANWC28715	Australian National Wildlife Collection				unknown	This study (Andrew Iwaniuk unpublished data)
Anseriformes	Anatidae	Chenonetta	jubata		Chenonetta_jubata	f	1	4.27	Vol		760	MV B19260	Museum Victoria				unknown	This study (Andrew Iwaniuk unpublished data)
Anseriformes	Anatidae	Chenonetta	jubata		Chenonetta_jubata	m	1	4.4	Vol		810	ANWC22429	Australian National Wildlife Collection				unknown	This study (Andrew Iwaniuk unpublished data)
Anseriformes	Anatidae	Chenonetta	jubata		Chenonetta_jubata	m	1	4.6	Vol		880	ANWC22433	Australian National Wildlife Collection				unknown	This study (Andrew Iwaniuk unpublished data)
Anseriformes	Anatidae	Chenonetta	jubata		Chenonetta_jubata	m	1	4.6	Vol		970	ANWC22434	Australian National Wildlife Collection				unknown	This study (Andrew Iwaniuk unpublished data)
Anseriformes	Anatidae	Chenonetta	jubata		Chenonetta_jubata	m	1	4.1	Vol		740	ANWC22436	Australian National Wildlife Collection				unknown	This study (Andrew Iwaniuk unpublished data)
Anseriformes	Anatidae	Chenonetta	jubata		Chenonetta_jubata	m	1	4.26	Vol		835	MV B19152	Museum Victoria				unknown	This study (Andrew Iwaniuk unpublished data)
Anseriformes	Anatidae	Chenonetta	jubata		Chenonetta_jubata	m	1	4.5	Vol		959	MV B20233	Museum Victoria				unknown	This study (Andrew Iwaniuk unpublished data)
Anseriformes	Anatidae	Chenonetta	jubata		Chenonetta_jubata	m	1	4.01	Vol		655	MV B23733	Museum Victoria				unknown	This study (Andrew Iwaniuk unpublished data)
Anseriformes	Anatidae	Chenonetta	jubata		Chenonetta_jubata	m	1	4.05	Vol		623	QM O.28254	Queensland Museum				unknown	This study (Andrew Iwaniuk unpublished data)
Anseriformes	Anatidae	Chenonetta	jubata		Chenonetta_jubata	m	1	3.49	Vol		832	SAM B37195	South Australian Museum				unknown	This study (Andrew Iwaniuk unpublished data)
Anseriformes	Anatidae	Chloephaga	hybrida	hybrida	Chloephaga_hybrida	f	1	6.4	Vol		2250	USNM490796	National Museum of Natural History				unknown	This study (Andrew Iwaniuk unpublished data)
Anseriformes	Anatidae	Chloephaga	hybrida	hybrida	Chloephaga_hybrida	f	1	7.4	Vol		2599	USNM490885	National Museum of Natural History				unknown	This study (Andrew Iwaniuk unpublished data)
Anseriformes	Anatidae	Chloephaga	hybrida	hybrida	Chloephaga_hybrida	f	1	7.15	Vol		2357	USNM490889	National Museum of Natural History				unknown	This study (Andrew Iwaniuk unpublished data)
Anseriformes	Anatidae	Chloephaga	hybrida	hybrida	Chloephaga_hybrida	f	1	7.12	Vol		2510	USNM490928	National Museum of Natural History				unknown	This study (Andrew Iwaniuk unpublished data)
Anseriformes	Anatidae	Chloephaga	hybrida	hybrida	Chloephaga_hybrida	f	1	6.35	Vol		2168.3	USNM490975	National Museum of Natural History				unknown	This study (Andrew Iwaniuk unpublished data)
Anseriformes	Anatidae	Chloephaga	hybrida	hybrida	Chloephaga_hybrida	f	1	7.3	Vol		2410	USNM490983	National Museum of Natural History				unknown	This study (Andrew Iwaniuk unpublished data)
Anseriformes	Anatidae	Chloephaga	hybrida	hybrida	Chloephaga_hybrida	f	1	6.97	Vol		2200	MNHM1993.75	the National Natural Histoey Museum of France				unknown	This study (Andrew Iwaniuk unpublished data)
Anseriformes	Anatidae	Chloephaga	hybrida	hybrida	Chloephaga_hybrida	f	1	6.93	Vol		2000	UMMNH207353	University of Michigan Museum of Natural History				unknown	This study (Andrew Iwaniuk unpublished data)
Anseriformes	Anatidae	Chloephaga	hybrida	hybrida	Chloephaga_hybrida	m	1	7.54	Vol		3000	USNM490929	National Museum of Natural History				unknown	This study (Andrew Iwaniuk unpublished data)
Anseriformes	Anatidae	Chloephaga	hybrida	hybrida	Chloephaga_hybrida	m	1	7.18	Vol		2800	USNM490984	National Museum of Natural History				unknown	This study (Andrew Iwaniuk unpublished data)
Anseriformes	Anatidae	Chloephaga	hybrida	hybrida	Chloephaga_hybrida	m	1	7.32	Vol		3000	MNHN1993.71	the National Natural Histoey Museum of France				unknown	This study (Andrew Iwaniuk unpublished data)
Anseriformes	Anatidae	Chloephaga	hybrida		Chloephaga_hybrida	m	1	8.2	Vol		3200	USNM490982	National Museum of Natural History				unknown	This study (Andrew Iwaniuk unpublished data)
Anseriformes	Anatidae	Chloephaga	melanoptera		Chloephaga_melanoptera	f	1	6.95	Vol		2272.73	BNHM125160	Barkeley Natural History Museums				unknown	This study (Andrew Iwaniuk unpublished data)
Anseriformes	Anatidae	Chloephaga	melanoptera		Chloephaga_melanoptera	f	1	7.39	Vol		2200	BNHM125162	Barkeley Natural History Museums				unknown	This study (Andrew Iwaniuk unpublished data)
Anseriformes	Anatidae	Chloephaga	melanoptera		Chloephaga_melanoptera	m	1	7.55	Vol		2954.55	BNHM125161	Barkeley Natural History Museums				unknown	This study (Andrew Iwaniuk unpublished data)
Anseriformes	Anatidae	Chloephaga	poliocephala		Chloephaga_poliocephala	m	1	5.8	Vol		958	USNM620512	National Museum of Natural History				unknown	This study (Andrew Iwaniuk unpublished data)
Anseriformes	Anatidae	Clangula	hyemalis		Clangula_hyemalis	f	1	4.54	Vol		659	CMN S-3309	Canadian Museum of Nature				unknown	This study (Andrew Iwaniuk unpublished data)
Anseriformes	Anatidae	Clangula	hyemalis		Clangula_hyemalis	f	1	4.21	Vol		486.7	FMNH339111	Field Museum of Natural History				unknown	This study (Andrew Iwaniuk unpublished data)
Anseriformes	Anatidae	Clangula	hyemalis		Clangula_hyemalis	f	1	4.8	Vol		655	USNM561197	National Museum of Natural History				unknown	This study (Andrew Iwaniuk unpublished data)
Anseriformes	Anatidae	Clangula	hyemalis		Clangula_hyemalis	m	1	5	Vol		850	USNM561192	National Museum of Natural History				unknown	This study (Andrew Iwaniuk unpublished data)
Anseriformes	Anatidae	Clangula	hyemalis		Clangula_hyemalis	m	1	5.8	Vol		866	USNM621853	National Museum of Natural History				unknown	This study (Andrew Iwaniuk unpublished data)
Anseriformes	Anatidae	Clangula	hyemalis		Clangula_hyemalis	m	1	4.9	Vol		699	USNM621857	National Museum of Natural History				unknown	This study (Andrew Iwaniuk unpublished data)
Anseriformes	Anatidae	Clangula	hyemalis		Clangula_hyemalis	m	1		Mass	4.866	782	HoBR Not registered	House of Bird Research collection	11-xx-2001			Adult	This study (Johannes Erritzøe House of Bird Research collection)
Anseriformes	Anatidae	Clangula	hyemalis		Clangula_hyemalis	m	1		Mass	5.187	812	HoBR Not registered	House of Bird Research collection	1-xx-1997			Adult	This study (Johannes Erritzøe House of Bird Research collection)
Anseriformes	Anatidae	Clangula	hyemalis		Clangula_hyemalis	m	1		Mass	4.663	920	HoBR Not registered	House of Bird Research collection	10-1-2007			Adult	This study (Johannes Erritzøe House of Bird Research collection)
Anseriformes	Anatidae	Clangula	hyemalis		Clangula_hyemalis	m	1		Mass	5.12	673.8	HoBR Not registered	House of Bird Research collection				Adult	This study (Johannes Erritzøe House of Bird Research collection)
Anseriformes	Anatidae	Clangula	hyemalis		Clangula_hyemalis	m	1		Mass	4.3	678.7	HoBR Not registered	House of Bird Research collection				Adult	This study (Johannes Erritzøe House of Bird Research collection)
Anseriformes	Anatidae	Clangula	hyemalis		Clangula_hyemalis	m	1		Mass	3.82	683.6	HoBR Not registered	House of Bird Research collection				Adult	This study (Johannes Erritzøe House of Bird Research collection)
Anseriformes	Anatidae	Clangula	hyemalis		Clangula_hyemalis	m	1		Mass	4.38	712.5	HoBR Not registered	House of Bird Research collection				Adult	This study (Johannes Erritzøe House of Bird Research collection)
Anseriformes	Anatidae	Clangula	hyemalis		Clangula_hyemalis	m	1		Mass	4.8	759	HoBR Not registered	House of Bird Research collection				Adult	This study (Johannes Erritzøe House of Bird Research collection)
Anseriformes	Anatidae	Clangula	hyemalis		Clangula_hyemalis	m	1		Mass	4.15	776.5	HoBR Not registered	House of Bird Research collection				Adult	This study (Johannes Erritzøe House of Bird Research collection)
Anseriformes	Anatidae	Clangula	hyemalis		Clangula_hyemalis	m	1		Mass	4.65	938.5	HoBR Not registered	House of Bird Research collection				Adult	This study (Johannes Erritzøe House of Bird Research collection)
Anseriformes	Anatidae	Coscoroba	coscoroba		Coscoroba_coscoroba	f	1	7.92	Vol		2727.27	ROM116325	Royal Ontario Museum				unknown	This study (Andrew Iwaniuk unpublished data)
Anseriformes	Anatidae	Cygnus	atratus		Cygnus_atratus	f	1	12.9	Vol		5150	SAM B46115	South Australian Museum				unknown	This study (Andrew Iwaniuk unpublished data)
Anseriformes	Anatidae	Cygnus	atratus		Cygnus_atratus	m	1	13	Vol		6000	ANWC22220	Australian National Wildlife Collection				unknown	This study (Andrew Iwaniuk unpublished data)
Anseriformes	Anatidae	Cygnus	atratus		Cygnus_atratus	m	1	12.25	Vol		5500	MV B13986	Museum Victoria				unknown	This study (Andrew Iwaniuk unpublished data)
Anseriformes	Anatidae	Cygnus	atratus		Cygnus_atratus	m	1	12	Vol		4750	MV B14118	Museum Victoria				unknown	This study (Andrew Iwaniuk unpublished data)
Anseriformes	Anatidae	Cygnus	atratus		Cygnus_atratus	m	1	11.04	Vol		5511.36	ROM100098	Royal Ontario Museum				unknown	This study (Andrew Iwaniuk unpublished data)
Anseriformes	Anatidae	Cygnus	atratus		Cygnus_atratus	m	1	13.09	Vol		5200	SAM B46110	South Australian Museum				unknown	This study (Andrew Iwaniuk unpublished data)
Anseriformes	Anatidae	Cygnus	atratus		Cygnus_atratus	m	1	12.18	Vol		5450	SAM B46112	South Australian Museum				unknown	This study (Andrew Iwaniuk unpublished data)
Anseriformes	Anatidae	Cygnus	atratus		Cygnus_atratus	m	1	12.96	Vol		5350	SAM B46123	South Australian Museum				unknown	This study (Andrew Iwaniuk unpublished data)
Anseriformes	Anatidae	Cygnus	buccinator		Cygnus_buccinator	f	1	22.54	Vol		11269	FMNH397013	Field Museum of Natural History				unknown	This study (Andrew Iwaniuk unpublished data)
Anseriformes	Anatidae	Cygnus	buccinator		Cygnus_buccinator	f	1	20.76	Vol		10570	PMA Z01.9.2	Royal Alberta Museum				unknown	This study (Andrew Iwaniuk unpublished data)
Anseriformes	Anatidae	Cygnus	buccinator		Cygnus_buccinator	f	1	21.41	Vol		5106	PMA Z78.52.2	Royal Alberta Museum				unknown	This study (Andrew Iwaniuk unpublished data)
Anseriformes	Anatidae	Cygnus	buccinator		Cygnus_buccinator	f	1	18	Vol		5218	PMA Z79.15.3	Royal Alberta Museum				unknown	This study (Andrew Iwaniuk unpublished data)
Anseriformes	Anatidae	Cygnus	buccinator		Cygnus_buccinator	f	1	19	Vol		10000	PMA Z80.20.29	Royal Alberta Museum				unknown	This study (Andrew Iwaniuk unpublished data)
Anseriformes	Anatidae	Cygnus	buccinator		Cygnus_buccinator	f	1	21.03	Vol		5909.09	ROM84649	Royal Ontario Museum				unknown	This study (Andrew Iwaniuk unpublished data)
Anseriformes	Anatidae	Cygnus	buccinator		Cygnus_buccinator	m	1	21	Vol		9528	PMA Z86.22.10	Royal Alberta Museum				unknown	This study (Andrew Iwaniuk unpublished data)
Anseriformes	Anatidae	Cygnus	buccinator		Cygnus_buccinator	m	1	21.5	Vol		9796	PMA Z86.5.1	Royal Alberta Museum				unknown	This study (Andrew Iwaniuk unpublished data)
Anseriformes	Anatidae	Cygnus	buccinator		Cygnus_buccinator	m	1	22	Vol		10550	PMA Z95.8.3	Royal Alberta Museum				unknown	This study (Andrew Iwaniuk unpublished data)
Anseriformes	Anatidae	Cygnus	buccinator		Cygnus_buccinator	m	1	20.5	Vol		8245.9	PMA Z96.14.1	Royal Alberta Museum				unknown	This study (Andrew Iwaniuk unpublished data)
Anseriformes	Anatidae	Cygnus	buccinator		Cygnus_buccinator	m	1	21.96	Vol		6193.18	ROM108800	Royal Ontario Museum				unknown	This study (Andrew Iwaniuk unpublished data)
Anseriformes	Anatidae	Cygnus	buccinator		Cygnus_buccinator	m	1	19.44	Vol		12272.7	ROM157555	Royal Ontario Museum				unknown	This study (Andrew Iwaniuk unpublished data)
Anseriformes	Anatidae	Cygnus	columbianus	bewickii	Cygnus_columbianus	f	1		Mass	17.75	6000	HoBR171707	House of Bird Research collection	12-1-1986	Henneby, DK		Adult	This study (Johannes Erritzøe House of Bird Research collection)
Anseriformes	Anatidae	Cygnus	columbianus	bewickii	Cygnus_columbianus	m	1		Mass	17.896	5000	HoBR354138	House of Bird Research collection	4-6-2013	Ulvedybet, DK	55.58N 10.35E	Adult	This study (Johannes Erritzøe House of Bird Research collection)
Anseriformes	Anatidae	Cygnus	columbianus	columbianus	Cygnus_columbianus	f	1	15.94	Vol		6025	FMNH348203	Field Museum of Natural History				unknown	This study (Andrew Iwaniuk unpublished data)
Anseriformes	Anatidae	Cygnus	columbianus	columbianus	Cygnus_columbianus	f	1	19.41	Vol		3636	FMNH357054	Field Museum of Natural History				unknown	This study (Andrew Iwaniuk unpublished data)
Anseriformes	Anatidae	Cygnus	columbianus	columbianus	Cygnus_columbianus	f	1	16	Vol		3478	FMNH365016	Field Museum of Natural History				unknown	This study (Andrew Iwaniuk unpublished data)
Anseriformes	Anatidae	Cygnus	columbianus	columbianus	Cygnus_columbianus	f	1	18.08	Vol		4199	FMNH385578	Field Museum of Natural History				unknown	This study (Andrew Iwaniuk unpublished data)
Anseriformes	Anatidae	Cygnus	columbianus	columbianus	Cygnus_columbianus	m	1	18.48	Vol		5895	FMNH348411	Field Museum of Natural History				unknown	This study (Andrew Iwaniuk unpublished data)
Anseriformes	Anatidae	Cygnus	columbianus	columbianus	Cygnus_columbianus	m	1	18.18	Vol		8025	FMNH385577	Field Museum of Natural History				unknown	This study (Andrew Iwaniuk unpublished data)
Anseriformes	Anatidae	Cygnus	columbianus		Cygnus_columbianus	f	1	16.5	Vol		6424	PMA Z80.43.12	Royal Alberta Museum				unknown	This study (Andrew Iwaniuk unpublished data)
Anseriformes	Anatidae	Cygnus	columbianus		Cygnus_columbianus	f	1	18.5	Vol		5107	PMA Z80.43.14	Royal Alberta Museum				unknown	This study (Andrew Iwaniuk unpublished data)
Anseriformes	Anatidae	Cygnus	columbianus		Cygnus_columbianus	f	1	17	Vol		8172	PMA Z81.58.7	Royal Alberta Museum				unknown	This study (Andrew Iwaniuk unpublished data)
Anseriformes	Anatidae	Cygnus	columbianus		Cygnus_columbianus	f	1	19	Vol		6250	PMA Z82.12.1	Royal Alberta Museum				unknown	This study (Andrew Iwaniuk unpublished data)
Anseriformes	Anatidae	Cygnus	columbianus		Cygnus_columbianus	f	1	15.5	Vol		5905	PMA Z85.38.1	Royal Alberta Museum				unknown	This study (Andrew Iwaniuk unpublished data)
Anseriformes	Anatidae	Cygnus	columbianus		Cygnus_columbianus	m	1	17	Vol		7716	PMA Z81.58.3	Royal Alberta Museum				unknown	This study (Andrew Iwaniuk unpublished data)
Anseriformes	Anatidae	Cygnus	columbianus		Cygnus_columbianus	m	1	17	Vol		8853	PMA Z81.58.5	Royal Alberta Museum				unknown	This study (Andrew Iwaniuk unpublished data)
Anseriformes	Anatidae	Cygnus	columbianus		Cygnus_columbianus	m	1	18	Vol		8739	PMA Z81.58.6	Royal Alberta Museum				unknown	This study (Andrew Iwaniuk unpublished data)
Anseriformes	Anatidae	Cygnus	columbianus		Cygnus_columbianus	m	1	17	Vol		7614	PMA Z83.8.45	Royal Alberta Museum				unknown	This study (Andrew Iwaniuk unpublished data)
Anseriformes	Anatidae	Cygnus	columbianus		Cygnus_columbianus	m	1	18	Vol		8079	PMA Z86.4.40	Royal Alberta Museum				unknown	This study (Andrew Iwaniuk unpublished data)
Anseriformes	Anatidae	Cygnus	cygnus		Cygnus_cygnus	f	1	20.09	Vol		7459	ANWC22226	Australian National Wildlife Collection				unknown	This study (Andrew Iwaniuk unpublished data)
Anseriformes	Anatidae	Cygnus	cygnus		Cygnus_cygnus	m	1	19.62	Vol		6703	ANWC22227	Australian National Wildlife Collection				unknown	This study (Andrew Iwaniuk unpublished data)
Anseriformes	Anatidae	Cygnus	melancoryphus		Cygnus_melancoryphus	f	1	9.47	Vol		2681	FMNH375859	Field Museum of Natural History				unknown	This study (Andrew Iwaniuk unpublished data)
Anseriformes	Anatidae	Cygnus	melancoryphus		Cygnus_melancoryphus	m	1	11.84	Vol		6136.36	ROM100097	Royal Ontario Museum				unknown	This study (Andrew Iwaniuk unpublished data)
Anseriformes	Anatidae	Cygnus	olor		Cygnus_olor	f	1	13.77	Vol		7960	FMNH348202	Field Museum of Natural History				unknown	This study (Andrew Iwaniuk unpublished data)
Anseriformes	Anatidae	Cygnus	olor		Cygnus_olor	m	1	16.04	Vol		6130	FMNH342448	Field Museum of Natural History				unknown	This study (Andrew Iwaniuk unpublished data)
Anseriformes	Anatidae	Cygnus	olor		Cygnus_olor	m	1	15.73	Vol		8977.27	ROM100115	Royal Ontario Museum				unknown	This study (Andrew Iwaniuk unpublished data)
Anseriformes	Anatidae	Cygnus	olor		Cygnus_olor	m	1	15.94	Vol		12500	ROM156149	Royal Ontario Museum				unknown	This study (Andrew Iwaniuk unpublished data)
Anseriformes	Anatidae	Cygnus	olor		Cygnus_olor	m	1		Mass	15.77	9000	HoBR171499	House of Bird Research collection	3-13-1986	Egernsund broen, DK	54.54N 09.36E	Adult	This study (Johannes Erritzøe House of Bird Research collection)
Anseriformes	Anatidae	Cygnus	olor		Cygnus_olor	m	1		Mass	13.89	7000	HoBR167144	House of Bird Research collection	5-21-1985	Vojens, DK	55.15N 09.17E	Adult	This study (Johannes Erritzøe House of Bird Research collection)
Anseriformes	Anatidae	Cygnus	olor		Cygnus_olor	m	1		Mass	16.845	13000	HoBR328951	House of Bird Research collection	4-9-2005	Hejlsminde, DK	55.22N 09.36E	Adult	This study (Johannes Erritzøe House of Bird Research collection)
Anseriformes	Anatidae	Cygnus	olor		Cygnus_olor	m	1		Mass	15.223	7000	HoBR273983	House of Bird Research collection	2-12-1996	Kolding Fjord, DK	55.29N 09.28E	Adult	This study (Johannes Erritzøe House of Bird Research collection)
Anseriformes	Anatidae	Cygnus	olor		Cygnus_olor	unknown	1		Mass	14.5	5528.25						Adult	Hrdlicka A (1905) Brain Weight in Vertebrates
Anseriformes	Anatidae	Dendrocygna	arcuata	australis	Dendrocygna_arcuata	f	1	4.9	Vol		720	ANWC22212	Australian National Wildlife Collection				unknown	This study (Andrew Iwaniuk unpublished data)
Anseriformes	Anatidae	Dendrocygna	arcuata	australis	Dendrocygna_arcuata	m	1	4.55	Vol		740	ANWC22214	Australian National Wildlife Collection				unknown	This study (Andrew Iwaniuk unpublished data)
Anseriformes	Anatidae	Dendrocygna	autumnalis	fulgens	Dendrocygna_autumnalis	f	1	4.04	Vol		512	ROM103346	Royal Ontario Museum				unknown	This study (Andrew Iwaniuk unpublished data)
Anseriformes	Anatidae	Dendrocygna	autumnalis	fulgens	Dendrocygna_autumnalis	m	1	4.9	Vol		640	UAM794	Museum of University of Alaska Fairbanks				unknown	This study (Andrew Iwaniuk unpublished data)
Anseriformes	Anatidae	Dendrocygna	bicolor		Dendrocygna_bicolor	f	1	4.13	Vol		731	FMNH375850	Field Museum of Natural History				unknown	This study (Andrew Iwaniuk unpublished data)
Anseriformes	Anatidae	Dendrocygna	bicolor		Dendrocygna_bicolor	f	1	4.33	Vol		711.7	FMNH375851	Field Museum of Natural History				unknown	This study (Andrew Iwaniuk unpublished data)
Anseriformes	Anatidae	Dendrocygna	bicolor		Dendrocygna_bicolor	m	1	4.3	Vol		750	BM45450	Burke Museum of Natural History				unknown	This study (Andrew Iwaniuk unpublished data)
Anseriformes	Anatidae	Dendrocygna	bicolor		Dendrocygna_bicolor	m	1		Mass	4.68	480	HoBR346015	House of Bird Research collection		captivity		Adult	This study (Johannes Erritzøe House of Bird Research collection)
Anseriformes	Anatidae	Dendrocygna	bicolor		Dendrocygna_bicolor	m	1		Mass	4.794	495	HoBR Not registered	House of Bird Research collection		captivity		Adult	This study (Johannes Erritzøe House of Bird Research collection)
Anseriformes	Anatidae	Dendrocygna	eytoni		Dendrocygna_eytoni	f	1	4.38	Vol		660	ANWC22193	Australian National Wildlife Collection				unknown	This study (Andrew Iwaniuk unpublished data)
Anseriformes	Anatidae	Dendrocygna	eytoni		Dendrocygna_eytoni	f	1	4.4	Vol		540	ANWC22195	Australian National Wildlife Collection				unknown	This study (Andrew Iwaniuk unpublished data)
Anseriformes	Anatidae	Dendrocygna	eytoni		Dendrocygna_eytoni	f	1	4.44	Vol		690	ANWC22196	Australian National Wildlife Collection				unknown	This study (Andrew Iwaniuk unpublished data)
Anseriformes	Anatidae	Dendrocygna	eytoni		Dendrocygna_eytoni	f	1	4.11	Vol		695	ANWC22198	Australian National Wildlife Collection				unknown	This study (Andrew Iwaniuk unpublished data)
Anseriformes	Anatidae	Dendrocygna	eytoni		Dendrocygna_eytoni	f	1	4.41	Vol		840	ANWC22201	Australian National Wildlife Collection				unknown	This study (Andrew Iwaniuk unpublished data)
Anseriformes	Anatidae	Dendrocygna	eytoni		Dendrocygna_eytoni	f	1	4.4	Vol		780	ANWC22208	Australian National Wildlife Collection				unknown	This study (Andrew Iwaniuk unpublished data)
Anseriformes	Anatidae	Dendrocygna	eytoni		Dendrocygna_eytoni	f	1	4.15	Vol		760	ANWC22209	Australian National Wildlife Collection				unknown	This study (Andrew Iwaniuk unpublished data)
Anseriformes	Anatidae	Dendrocygna	eytoni		Dendrocygna_eytoni	f	1	4.95	Vol		670	ANWC22210	Australian National Wildlife Collection				unknown	This study (Andrew Iwaniuk unpublished data)
Anseriformes	Anatidae	Dendrocygna	eytoni		Dendrocygna_eytoni	m	1	4.39	Vol		790	ANWC22197	Australian National Wildlife Collection				unknown	This study (Andrew Iwaniuk unpublished data)
Anseriformes	Anatidae	Dendrocygna	eytoni		Dendrocygna_eytoni	m	1	4.63	Vol		900	ANWC22203	Australian National Wildlife Collection				unknown	This study (Andrew Iwaniuk unpublished data)
Anseriformes	Anatidae	Dendrocygna	eytoni		Dendrocygna_eytoni	m	1	5.28	Vol		650	ANWC22204	Australian National Wildlife Collection				unknown	This study (Andrew Iwaniuk unpublished data)
Anseriformes	Anatidae	Dendrocygna	eytoni		Dendrocygna_eytoni	m	1	4.63	Vol		800	ANWC22206	Australian National Wildlife Collection				unknown	This study (Andrew Iwaniuk unpublished data)
Anseriformes	Anatidae	Dendrocygna	eytoni		Dendrocygna_eytoni	m	1	4.27	Vol		880	ANWC22207	Australian National Wildlife Collection				unknown	This study (Andrew Iwaniuk unpublished data)
Anseriformes	Anatidae	Dendrocygna	viduata		Dendrocygna_viduata	f	1	3.96	Vol		445	FMNH360024	Field Museum of Natural History				unknown	This study (Andrew Iwaniuk unpublished data)
Anseriformes	Anatidae	Dendrocygna	viduata		Dendrocygna_viduata	f	1	4.21	Vol		615	FMNH360026	Field Museum of Natural History				unknown	This study (Andrew Iwaniuk unpublished data)
Anseriformes	Anatidae	Dendrocygna	viduata		Dendrocygna_viduata	f	1	4.45	Vol		823.1	FLMNH23203	Florida Museum of Natural History				unknown	This study (Andrew Iwaniuk unpublished data)
Anseriformes	Anatidae	Dendrocygna	viduata		Dendrocygna_viduata	m	1	4.56	Vol		440	FMNH360025	Field Museum of Natural History				unknown	This study (Andrew Iwaniuk unpublished data)
Anseriformes	Anatidae	Heteronetta	atricapilla		Heteronetta_atricapilla	m	1	3.04	Vol		565	UMMNH157003	University of Michigan Museum of Natural History				unknown	This study (Andrew Iwaniuk unpublished data)
Anseriformes	Anatidae	Histrionicus	histrionicus		Histrionicus_histrionicus	f	1	4.66	Vol		571	AMNH24140	Amrcian Museum of Natural History				unknown	This study (Andrew Iwaniuk unpublished data)
Anseriformes	Anatidae	Histrionicus	histrionicus		Histrionicus_histrionicus	f	1	4.85	Vol		639	AMNH24141	Amrcian Museum of Natural History				unknown	This study (Andrew Iwaniuk unpublished data)
Anseriformes	Anatidae	Histrionicus	histrionicus		Histrionicus_histrionicus	f	1	5.3	Vol		666	AMNH24142	Amrcian Museum of Natural History				unknown	This study (Andrew Iwaniuk unpublished data)
Anseriformes	Anatidae	Histrionicus	histrionicus		Histrionicus_histrionicus	f	1	4.72	Vol		630	CMNH S-15826	Carnegir Museum of Natural History				unknown	This study (Andrew Iwaniuk unpublished data)
Anseriformes	Anatidae	Histrionicus	histrionicus		Histrionicus_histrionicus	f	1	4.9	Vol		610	USNM612969	National Museum of Natural History				unknown	This study (Andrew Iwaniuk unpublished data)
Anseriformes	Anatidae	Histrionicus	histrionicus		Histrionicus_histrionicus	f	1	4.9	Vol		494.3	USNM620791	National Museum of Natural History				unknown	This study (Andrew Iwaniuk unpublished data)
Anseriformes	Anatidae	Histrionicus	histrionicus		Histrionicus_histrionicus	f	1	4.3	Vol		509.8	PMA 82.52.33	Royal Alberta Museum				unknown	This study (Andrew Iwaniuk unpublished data)
Anseriformes	Anatidae	Histrionicus	histrionicus		Histrionicus_histrionicus	f	1	4.8	Vol		518.7	PMA 82.52.47	Royal Alberta Museum				unknown	This study (Andrew Iwaniuk unpublished data)
Anseriformes	Anatidae	Histrionicus	histrionicus		Histrionicus_histrionicus	f	1	4.84	Vol		658.2	RBCM16157	Royal British Columbia Museum				unknown	This study (Andrew Iwaniuk unpublished data)
Anseriformes	Anatidae	Histrionicus	histrionicus		Histrionicus_histrionicus	m	1	5.25	Vol		594	AMNH24139	Amrcian Museum of Natural History				unknown	This study (Andrew Iwaniuk unpublished data)
Anseriformes	Anatidae	Histrionicus	histrionicus		Histrionicus_histrionicus	m	1	5.62	Vol		787.6	BM33320	Burke Museum of Natural History				unknown	This study (Andrew Iwaniuk unpublished data)
Anseriformes	Anatidae	Histrionicus	histrionicus		Histrionicus_histrionicus	m	1	5.33	Vol		660	MV B14143	Museum Victoria				unknown	This study (Andrew Iwaniuk unpublished data)
Anseriformes	Anatidae	Histrionicus	histrionicus		Histrionicus_histrionicus	m	1	5.48	Vol		614.1	PMA 82.52.6	Royal Alberta Museum				unknown	This study (Andrew Iwaniuk unpublished data)
Anseriformes	Anatidae	Histrionicus	histrionicus		Histrionicus_histrionicus	m	1		Mass	4.636	635	HoBR365360	House of Bird Research collection	6-11-2011	Kugoruk River, Alaska	68,39N 149.25W	Adult	This study (Johannes Erritzøe House of Bird Research collection)
Anseriformes	Anatidae	Hymenolaimus	malacorhynchos		Hymenolaimus_malacorhynchos	m	1	5.48	Vol		502	MONZ12042	Museum of New Zealand Te Papa Tongarewa				unknown	This study (Andrew Iwaniuk unpublished data)
Anseriformes	Anatidae	Hymenolaimus	malacorhynchos		Hymenolaimus_malacorhynchos	m	1	5.86	Vol		550	MONZ25641	Museum of New Zealand Te Papa Tongarewa				unknown	This study (Andrew Iwaniuk unpublished data)
Anseriformes	Anatidae	Lophodytes	cucullatus		Lophodytes_cucullatus	f	1	3.96	Vol		550.8	CMN S-3337	Canadian Museum of Nature				unknown	This study (Andrew Iwaniuk unpublished data)
Anseriformes	Anatidae	Lophodytes	cucullatus		Lophodytes_cucullatus	f	1	4.29	Vol		650	FMNH348955	Field Museum of Natural History				unknown	This study (Andrew Iwaniuk unpublished data)
Anseriformes	Anatidae	Lophodytes	cucullatus		Lophodytes_cucullatus	m	1	4.9	Vol		697	ANWC22629	Australian National Wildlife Collection				unknown	This study (Andrew Iwaniuk unpublished data)
Anseriformes	Anatidae	Lophodytes	cucullatus		Lophodytes_cucullatus	m	1	4.54	Vol		626.3	CMN S-3336	Canadian Museum of Nature				unknown	This study (Andrew Iwaniuk unpublished data)
Anseriformes	Anatidae	Lophodytes	cucullatus		Lophodytes_cucullatus	m	1	4.97	Vol		740	CMNH -13833	Carnegir Museum of Natural History				unknown	This study (Andrew Iwaniuk unpublished data)
Anseriformes	Anatidae	Lophodytes	cucullatus		Lophodytes_cucullatus	m	1	4.7	Vol		816	CMNH S-14350	Carnegir Museum of Natural History				unknown	This study (Andrew Iwaniuk unpublished data)
Anseriformes	Anatidae	Lophodytes	cucullatus		Lophodytes_cucullatus	m	1	5.06	Vol		745	FMNH 351037	Field Museum of Natural History				unknown	This study (Andrew Iwaniuk unpublished data)
Anseriformes	Anatidae	Lophodytes	cucullatus		Lophodytes_cucullatus	m	1	4.54	Vol		625.8	FMNH339145	Field Museum of Natural History				unknown	This study (Andrew Iwaniuk unpublished data)
Anseriformes	Anatidae	Lophonetta	specularioides	specularioides	Lophonetta_specularioides	f	1	4.65	Vol		803.4	USNM490901	National Museum of Natural History				unknown	This study (Andrew Iwaniuk unpublished data)
Anseriformes	Anatidae	Lophonetta	specularioides		Lophonetta_specularioides	f	1	4.4	Vol		921.7	USNM491007	National Museum of Natural History				unknown	This study (Andrew Iwaniuk unpublished data)
Anseriformes	Anatidae	Lophonetta	specularioides		Lophonetta_specularioides	m	1	4.55	Vol		990.8	USNM491002	National Museum of Natural History				unknown	This study (Andrew Iwaniuk unpublished data)
Anseriformes	Anatidae	Malacorhynchus	membranaceus		Malacorhynchus_membranaceus	f	1	2.48	Vol		210	ANWC22562	Australian National Wildlife Collection				unknown	This study (Andrew Iwaniuk unpublished data)
Anseriformes	Anatidae	Malacorhynchus	membranaceus		Malacorhynchus_membranaceus	f	1	2.57	Vol		400	ANWC22566	Australian National Wildlife Collection				unknown	This study (Andrew Iwaniuk unpublished data)
Anseriformes	Anatidae	Malacorhynchus	membranaceus		Malacorhynchus_membranaceus	f	1	3	Vol		275	ANWC22567	Australian National Wildlife Collection				unknown	This study (Andrew Iwaniuk unpublished data)
Anseriformes	Anatidae	Malacorhynchus	membranaceus		Malacorhynchus_membranaceus	f	1	3.05	Vol		230	ANWC22571	Australian National Wildlife Collection				unknown	This study (Andrew Iwaniuk unpublished data)
Anseriformes	Anatidae	Malacorhynchus	membranaceus		Malacorhynchus_membranaceus	f	1	2.79	Vol		374	MV B20295	Museum Victoria				unknown	This study (Andrew Iwaniuk unpublished data)
Anseriformes	Anatidae	Malacorhynchus	membranaceus		Malacorhynchus_membranaceus	f	1	2.9	Vol		305	USNM553596	National Museum of Natural History				unknown	This study (Andrew Iwaniuk unpublished data)
Anseriformes	Anatidae	Malacorhynchus	membranaceus		Malacorhynchus_membranaceus	m	1	2.92	Vol		360	ANWC22578	Australian National Wildlife Collection				unknown	This study (Andrew Iwaniuk unpublished data)
Anseriformes	Anatidae	Malacorhynchus	membranaceus		Malacorhynchus_membranaceus	m	1	3.38	Vol		409.1	MV B16052	Museum Victoria				unknown	This study (Andrew Iwaniuk unpublished data)
Anseriformes	Anatidae	Malacorhynchus	membranaceus		Malacorhynchus_membranaceus	m	1	3.09	Vol		420	MV B17908	Museum Victoria				unknown	This study (Andrew Iwaniuk unpublished data)
Anseriformes	Anatidae	Malacorhynchus	membranaceus		Malacorhynchus_membranaceus	m	1	2.58	Vol		383	MV B18367	Museum Victoria				unknown	This study (Andrew Iwaniuk unpublished data)
Anseriformes	Anatidae	Malacorhynchus	membranaceus		Malacorhynchus_membranaceus	m	1	2.86	Vol		415	MV B19151	Museum Victoria				unknown	This study (Andrew Iwaniuk unpublished data)
Anseriformes	Anatidae	Malacorhynchus	membranaceus		Malacorhynchus_membranaceus	m	1	3	Vol		405	MV B19283	Museum Victoria				unknown	This study (Andrew Iwaniuk unpublished data)
Anseriformes	Anatidae	Malacorhynchus	membranaceus		Malacorhynchus_membranaceus	m	1	2.94	Vol		370	MV B19324	Museum Victoria				unknown	This study (Andrew Iwaniuk unpublished data)
Anseriformes	Anatidae	Melanitta	fusca	deglandi	Melanitta_fusca	f	1	6.6	Vol		1642	PMA Z80.60.185	Royal Alberta Museum				unknown	This study (Andrew Iwaniuk unpublished data)
Anseriformes	Anatidae	Melanitta	fusca	deglandi	Melanitta_fusca	f	1	6.5	Vol		1669.4	PMA Z80.60.186	Royal Alberta Museum				unknown	This study (Andrew Iwaniuk unpublished data)
Anseriformes	Anatidae	Melanitta	fusca	deglandi	Melanitta_fusca	f	1	6	Vol		1112.6	PMA Z83.12.13	Royal Alberta Museum				unknown	This study (Andrew Iwaniuk unpublished data)
Anseriformes	Anatidae	Melanitta	fusca	deglandi	Melanitta_fusca	m	1	7.4	Vol		1512.4	PMA Z80.60.183	Royal Alberta Museum				unknown	This study (Andrew Iwaniuk unpublished data)
Anseriformes	Anatidae	Melanitta	fusca	deglandi	Melanitta_fusca	m	1	7.4	Vol		1675.6	PMA Z80.60.184	Royal Alberta Museum				unknown	This study (Andrew Iwaniuk unpublished data)
Anseriformes	Anatidae	Melanitta	fusca	deglandi	Melanitta_fusca	m	1	7.2	Vol		1523	PMA Z87.27.195	Royal Alberta Museum				unknown	This study (Andrew Iwaniuk unpublished data)
Anseriformes	Anatidae	Melanitta	fusca	deglandi	Melanitta_fusca	m	1	7	Vol		1598.2	PMA Z87.27.200	Royal Alberta Museum				unknown	This study (Andrew Iwaniuk unpublished data)
Anseriformes	Anatidae	Melanitta	fusca	deglandi	Melanitta_fusca	m	1	7.3	Vol		1704.8	PMA Z89.29.21	Royal Alberta Museum				unknown	This study (Andrew Iwaniuk unpublished data)
Anseriformes	Anatidae	Melanitta	fusca	fusca	Melanitta_fusca	f	1	6.65	Vol		1725	ZMUC collection	Zoological Museum at University of Copenhagen				unknown	This study (Andrew Iwaniuk unpublished data)
Anseriformes	Anatidae	Melanitta	fusca		Melanitta_fusca	m	1		Mass	6.58	1450	HoBR Not registered	House of Bird Research collection				Adult	This study (Johannes Erritzøe House of Bird Research collection)
Anseriformes	Anatidae	Melanitta	fusca		Melanitta_fusca	m	1		Mass	7	1600	HoBR Not registered	House of Bird Research collection				Adult	This study (Johannes Erritzøe House of Bird Research collection)
Anseriformes	Anatidae	Melanitta	nigra	americana	Melanitta_nigra	f	1	5.16	Vol		900	FMNH313407	Field Museum of Natural History				unknown	This study (Andrew Iwaniuk unpublished data)
Anseriformes	Anatidae	Melanitta	nigra	americana	Melanitta_nigra	m	1	7.24	Vol		1200	ANWC22219	Australian National Wildlife Collection				unknown	This study (Andrew Iwaniuk unpublished data)
Anseriformes	Anatidae	Melanitta	nigra	nigra	Melanitta_nigra	m	1	5.68	Vol		1238	ZMUC collection	Zoological Museum at University of Copenhagen				unknown	This study (Andrew Iwaniuk unpublished data)
Anseriformes	Anatidae	Melanitta	nigra	nigra	Melanitta_nigra	m	1		Mass	6.238	926	HoBR Not registered	House of Bird Research collection	4-1-2013	Fanø, DK	55.25N 08.27E	Adult	This study (Johannes Erritzøe House of Bird Research collection)
Anseriformes	Anatidae	Melanitta	nigra	nigra	Melanitta_nigra	m	1		Mass	5.401	1200	HoBR Not registered	House of Bird Research collection	11-2-1997	Kolding, DK	55.29N 09.28E	Adult	This study (Johannes Erritzøe House of Bird Research collection)
Anseriformes	Anatidae	Melanitta	nigra	nigra	Melanitta_nigra	m	1		Mass	5.707	870	HoBR Not registered	House of Bird Research collection	2-5-2008	Skallingen, DK	55.31N 08.16E	Adult	This study (Johannes Erritzøe House of Bird Research collection)
Anseriformes	Anatidae	Melanitta	nigra	nigra	Melanitta_nigra	m	1		Mass	5.015	880	HoBR Not registered	House of Bird Research collection	2-5-2008	Skallingen, DK	55.31N 08.16E	Adult	This study (Johannes Erritzøe House of Bird Research collection)
Anseriformes	Anatidae	Melanitta	nigra	nigra	Melanitta_nigra	m	1		Mass	5.963	1010	HoBR Not registered	House of Bird Research collection	2-5-2008	Skallingen, DK	55.31N 08.16E	Adult	This study (Johannes Erritzøe House of Bird Research collection)
Anseriformes	Anatidae	Melanitta	nigra	nigra	Melanitta_nigra	m	1		Mass	6.361	1267	HoBR Not registered	House of Bird Research collection	2-20-2004	near Juelsminde, DK	55.42N 10.00E	Adult	This study (Johannes Erritzøe House of Bird Research collection)
Anseriformes	Anatidae	Melanitta	nigra	nigra	Melanitta_nigra	m	1		Mass	5.76	727	HoBR Not registered	House of Bird Research collection				Adult	This study (Johannes Erritzøe House of Bird Research collection)
Anseriformes	Anatidae	Melanitta	perspicillata		Melanitta_perspicillata	f	1	5.1	Vol		829.3	PMA 88.22.110	Royal Alberta Museum				unknown	This study (Andrew Iwaniuk unpublished data)
Anseriformes	Anatidae	Melanitta	perspicillata		Melanitta_perspicillata	m	1	5.91	Vol		1140	AMNH17227	Amrcian Museum of Natural History				unknown	This study (Andrew Iwaniuk unpublished data)
Anseriformes	Anatidae	Melanitta	perspicillata		Melanitta_perspicillata	m	1	6.49	Vol		532	AMWC22621	Australian National Wildlife Collection				unknown	This study (Andrew Iwaniuk unpublished data)
Anseriformes	Anatidae	Melanitta	perspicillata		Melanitta_perspicillata	m	1	6.4	Vol		865.4	PMA 84.39.52	Royal Alberta Museum				unknown	This study (Andrew Iwaniuk unpublished data)
Anseriformes	Anatidae	Melanitta	perspicillata		Melanitta_perspicillata	m	1	6.2	Vol		902	PMA 88.22.108	Royal Alberta Museum				unknown	This study (Andrew Iwaniuk unpublished data)
Anseriformes	Anatidae	Melanitta	perspicillata		Melanitta_perspicillata	m	1	6.2	Vol		895.6	PMA 88.22.109	Royal Alberta Museum				unknown	This study (Andrew Iwaniuk unpublished data)
Anseriformes	Anatidae	Melanitta	perspicillata		Melanitta_perspicillata	m	1	6.4	Vol		989.9	PMA 88.22.56	Royal Alberta Museum				unknown	This study (Andrew Iwaniuk unpublished data)
Anseriformes	Anatidae	Mergellus	albellus		Mergellus_albellus	m	1	4.26	Vol		535	UMMNH 224175	University of Michigan Museum of Natural History				unknown	This study (Andrew Iwaniuk unpublished data)
Anseriformes	Anatidae	Mergus	merganser	americanus	Mergus_merganser	f	1	6.34	Vol		1477.4	CMN S-3340	Canadian Museum of Nature				unknown	This study (Andrew Iwaniuk unpublished data)
Anseriformes	Anatidae	Mergus	merganser	americanus	Mergus_merganser	f	1	5.94	Vol		1540	FMNH347637	Field Museum of Natural History				unknown	This study (Andrew Iwaniuk unpublished data)
Anseriformes	Anatidae	Mergus	merganser	americanus	Mergus_merganser	f	1	5.5	Vol		1052.5	PMA 89.57.21	Royal Alberta Museum				unknown	This study (Andrew Iwaniuk unpublished data)
Anseriformes	Anatidae	Mergus	merganser	americanus	Mergus_merganser	f	1	5.7	Vol		928.2	PMA 89.57.50	Royal Alberta Museum				unknown	This study (Andrew Iwaniuk unpublished data)
Anseriformes	Anatidae	Mergus	merganser	americanus	Mergus_merganser	f	1	5.5	Vol		959.4	PMA 89.57.67	Royal Alberta Museum				unknown	This study (Andrew Iwaniuk unpublished data)
Anseriformes	Anatidae	Mergus	merganser	americanus	Mergus_merganser	m	1	7.06	Vol		1910	FMNH347635	Field Museum of Natural History				unknown	This study (Andrew Iwaniuk unpublished data)
Anseriformes	Anatidae	Mergus	merganser	americanus	Mergus_merganser	m	1	6.6	Vol		605	FMNH360140	Field Museum of Natural History				unknown	This study (Andrew Iwaniuk unpublished data)
Anseriformes	Anatidae	Mergus	merganser	americanus	Mergus_merganser	m	1	6	Vol		1685.8	PMA 98.1.7	Royal Alberta Museum				unknown	This study (Andrew Iwaniuk unpublished data)
Anseriformes	Anatidae	Mergus	merganser	merganser	Mergus_merganser	f	1		Mass	6.5	1280	HoBR Not registered	House of Bird Research collection	2-28-1993	Kolding Fjord, DK	55.29N 09.28E	Adult	This study (Johannes Erritzøe House of Bird Research collection)
Anseriformes	Anatidae	Mergus	merganser	merganser	Mergus_merganser	f	1		Mass	6.15	1290	HoBR Not registered	House of Bird Research collection				Adult	This study (Johannes Erritzøe House of Bird Research collection)
Anseriformes	Anatidae	Mergus	merganser	merganser	Mergus_merganser	m	1		Mass	7.396	1080	HoBR274010	House of Bird Research collection	1-31-1996	Sønderborg, DK	54.55N 09.45E	Adult	This study (Johannes Erritzøe House of Bird Research collection)
Anseriformes	Anatidae	Mergus	merganser	merganser	Mergus_merganser	m	1		Mass	7.098	1880	HoBR Not registered	House of Bird Research collection	1-19-2002	Roskilde Fjord, DK	55.22N 12.09E	Adult	This study (Johannes Erritzøe House of Bird Research collection)
Anseriformes	Anatidae	Mergus	merganser	merganser	Mergus_merganser	m	1		Mass	7.098	1880	HoBR Not registered	House of Bird Research collection	1-19-2002	Roskilde Fjord, DK	55.22N 12.09E	Adult	This study (Johannes Erritzøe House of Bird Research collection)
Anseriformes	Anatidae	Mergus	merganser	merganser	Mergus_merganser	m	1		Mass	6.941	1800	HoBR Not registered	House of Bird Research collection	10-xx-2005	Vejle, DK	55.42N 09.32E	Adult	This study (Johannes Erritzøe House of Bird Research collection)
Anseriformes	Anatidae	Mergus	merganser	merganser	Mergus_merganser	m	1		Mass	6.75	1089	HoBR Not registered	House of Bird Research collection				Adult	This study (Johannes Erritzøe House of Bird Research collection)
Anseriformes	Anatidae	Mergus	merganser	merganser	Mergus_merganser	m	1		Mass	8.2	1720	HoBR Not registered	House of Bird Research collection				Adult	This study (Johannes Erritzøe House of Bird Research collection)
Anseriformes	Anatidae	Mergus	merganser	merganser	Mergus_merganser	m	1		Mass	7.12	1780	HoBR Not registered	House of Bird Research collection				Adult	This study (Johannes Erritzøe House of Bird Research collection)
Anseriformes	Anatidae	Mergus	serrator		Mergus_serrator	f	1		Mass	5.289	770	CQ26			Tavane, Canada		unknown	Crile G and Quiring DP (1940) Ohio J Sci 40:219-259.
Anseriformes	Anatidae	Mergus	serrator		Mergus_serrator	f	1	4.16	Vol		624.7	CMN S-3400	Canadian Museum of Nature				unknown	This study (Andrew Iwaniuk unpublished data)
Anseriformes	Anatidae	Mergus	serrator		Mergus_serrator	f	1	4.32	Vol		600	FMNH342481	Field Museum of Natural History				unknown	This study (Andrew Iwaniuk unpublished data)
Anseriformes	Anatidae	Mergus	serrator		Mergus_serrator	f	1	4.23	Vol		555	FMNH360142	Field Museum of Natural History				unknown	This study (Andrew Iwaniuk unpublished data)
Anseriformes	Anatidae	Mergus	serrator		Mergus_serrator	f	1	4.8	Vol		960.5	PMA89.57.22	Royal Alberta Museum				unknown	This study (Andrew Iwaniuk unpublished data)
Anseriformes	Anatidae	Mergus	serrator		Mergus_serrator	f	1	4.5	Vol		826.8	PMA89.57.3	Royal Alberta Museum				unknown	This study (Andrew Iwaniuk unpublished data)
Anseriformes	Anatidae	Mergus	serrator		Mergus_serrator	f	1	4.7	Vol		988.5	PMA89.57.65	Royal Alberta Museum				unknown	This study (Andrew Iwaniuk unpublished data)
Anseriformes	Anatidae	Mergus	serrator		Mergus_serrator	f	1		Mass	5.67	706	HoBR Not registered	House of Bird Research collection				Adult	This study (Johannes Erritzøe House of Bird Research collection)
Anseriformes	Anatidae	Mergus	serrator		Mergus_serrator	m	1	4.96	Vol		1200	CMNH S-13574	Carnegir Museum of Natural History				unknown	This study (Andrew Iwaniuk unpublished data)
Anseriformes	Anatidae	Mergus	serrator		Mergus_serrator	m	1	4.85	Vol		621	FMNH375949	Field Museum of Natural History				unknown	This study (Andrew Iwaniuk unpublished data)
Anseriformes	Anatidae	Mergus	serrator		Mergus_serrator	m	1	5.28	Vol		615	FMNH430584	Field Museum of Natural History				unknown	This study (Andrew Iwaniuk unpublished data)
Anseriformes	Anatidae	Mergus	serrator		Mergus_serrator	m	1	4.8	Vol		621.2	PMA86.4.58	Royal Alberta Museum				unknown	This study (Andrew Iwaniuk unpublished data)
Anseriformes	Anatidae	Mergus	serrator		Mergus_serrator	m	1	5.3	Vol		1082.6	PMA89.57.66	Royal Alberta Museum				unknown	This study (Andrew Iwaniuk unpublished data)
Anseriformes	Anatidae	Mergus	serrator		Mergus_serrator	m	1		Mass	5.161	1040	HoBR365355	House of Bird Research collection	5-20-2005	Attu Is. Alaska	5256N 73.00W	Adult	This study (Johannes Erritzøe House of Bird Research collection)
Anseriformes	Anatidae	Mergus	serrator		Mergus_serrator	m	1		Mass	5.262	1100	HoBR Not registered	House of Bird Research collection	11-4-2005	Egholm, Marstal, DK	54.51N 10.31E	Adult	This study (Johannes Erritzøe House of Bird Research collection)
Anseriformes	Anatidae	Mergus	serrator		Mergus_serrator	m	1		Mass	4.572	1119.5	HoBR Not registered	House of Bird Research collection	10-29-1996	Skagen, DK	57.43N 10,35E	Adult	This study (Johannes Erritzøe House of Bird Research collection)
Anseriformes	Anatidae	Mergus	serrator		Mergus_serrator	m	1		Mass	5.27	1190	HoBR Not registered	House of Bird Research collection				Adult	This study (Johannes Erritzøe House of Bird Research collection)
Anseriformes	Anatidae	Mergus	serrator		Mergus_serrator	m	1		Mass	5.55	1380	HoBR Not registered	House of Bird Research collection				Adult	This study (Johannes Erritzøe House of Bird Research collection)
Anseriformes	Anatidae	Neochen	jubata		Neochen_jubata	m	1	6.1	Vol		1416	USNM620513	National Museum of Natural History				unknown	This study (Andrew Iwaniuk unpublished data)
Anseriformes	Anatidae	Netta	erythrophthalma	brunnea	Netta_erythrophthalma	f	1	4.5	Vol		820.5	FMNH368807	Field Museum of Natural History				unknown	This study (Andrew Iwaniuk unpublished data)
Anseriformes	Anatidae	Netta	erythrophthalma	brunnea	Netta_erythrophthalma	f	1	5	Vol		780.6	FLMNH23525	Florida Museum of Natural History				unknown	This study (Andrew Iwaniuk unpublished data)
Anseriformes	Anatidae	Netta	erythrophthalma	brunnea	Netta_erythrophthalma	f	1	4.6	Vol		900	USNM558441	National Museum of Natural History				unknown	This study (Andrew Iwaniuk unpublished data)
Anseriformes	Anatidae	Netta	erythrophthalma	brunnea	Netta_erythrophthalma	m	1	5.33	Vol		700.5	FMNH368805	Field Museum of Natural History				unknown	This study (Andrew Iwaniuk unpublished data)
Anseriformes	Anatidae	Netta	rufina		Netta_rufina	m	1	5.34	Vol		1090	BM56614	Burke Museum of Natural History				unknown	This study (Andrew Iwaniuk unpublished data)
Anseriformes	Anatidae	Netta	rufina		Netta_rufina	m	1	5.65	Vol		1150	USNM621199	National Museum of Natural History				unknown	This study (Andrew Iwaniuk unpublished data)
Anseriformes	Anatidae	Netta	rufina		Netta_rufina	m	1	5.09	Vol		959.2	PMA Z79.101.32	Royal Alberta Museum				unknown	This study (Andrew Iwaniuk unpublished data)
Anseriformes	Anatidae	Nettapus	pulchellus		Nettapus_pulchellus	f	1	2.7	Vol		360	ANWC48091	Australian National Wildlife Collection				unknown	This study (Andrew Iwaniuk unpublished data)
Anseriformes	Anatidae	Nettapus	pulchellus		Nettapus_pulchellus	f	1	2.37	Vol		335	ANWC48105	Australian National Wildlife Collection				unknown	This study (Andrew Iwaniuk unpublished data)
Anseriformes	Anatidae	Nettapus	pulchellus		Nettapus_pulchellus	f	1	2.21	Vol		370	ANWC48108	Australian National Wildlife Collection				unknown	This study (Andrew Iwaniuk unpublished data)
Anseriformes	Anatidae	Nettapus	pulchellus		Nettapus_pulchellus	f	1	2.6	Vol		335	ANWC48109	Australian National Wildlife Collection				unknown	This study (Andrew Iwaniuk unpublished data)
Anseriformes	Anatidae	Nettapus	pulchellus		Nettapus_pulchellus	f	1	2.58	Vol		305	ANWC48110	Australian National Wildlife Collection				unknown	This study (Andrew Iwaniuk unpublished data)
Anseriformes	Anatidae	Nettapus	pulchellus		Nettapus_pulchellus	f	1	2.7	Vol		340	ANWC48129	Australian National Wildlife Collection				unknown	This study (Andrew Iwaniuk unpublished data)
Anseriformes	Anatidae	Nettapus	pulchellus		Nettapus_pulchellus	f	1	2.4	Vol		350	MV B14486	Museum Victoria				unknown	This study (Andrew Iwaniuk unpublished data)
Anseriformes	Anatidae	Nettapus	pulchellus		Nettapus_pulchellus	f	1	2.42	Vol		355	MV B14488	Museum Victoria				unknown	This study (Andrew Iwaniuk unpublished data)
Anseriformes	Anatidae	Nettapus	pulchellus		Nettapus_pulchellus	f	1	2.43	Vol		320	MV B14489	Museum Victoria				unknown	This study (Andrew Iwaniuk unpublished data)
Anseriformes	Anatidae	Nettapus	pulchellus		Nettapus_pulchellus	m	1	2.8	Vol		435	ANWC48103	Australian National Wildlife Collection				unknown	This study (Andrew Iwaniuk unpublished data)
Anseriformes	Anatidae	Nettapus	pulchellus		Nettapus_pulchellus	m	1	2.39	Vol		280	ANWC48104	Australian National Wildlife Collection				unknown	This study (Andrew Iwaniuk unpublished data)
Anseriformes	Anatidae	Nettapus	pulchellus		Nettapus_pulchellus	m	1	2.65	Vol		360	ANWC48116	Australian National Wildlife Collection				unknown	This study (Andrew Iwaniuk unpublished data)
Anseriformes	Anatidae	Nettapus	pulchellus		Nettapus_pulchellus	m	1	2.57	Vol		350	ANWC48118	Australian National Wildlife Collection				unknown	This study (Andrew Iwaniuk unpublished data)
Anseriformes	Anatidae	Nettapus	pulchellus		Nettapus_pulchellus	m	1	2.51	Vol		400	ANWC48119	Australian National Wildlife Collection				unknown	This study (Andrew Iwaniuk unpublished data)
Anseriformes	Anatidae	Nettapus	pulchellus		Nettapus_pulchellus	m	1	2.55	Vol		440	ANWC48135	Australian National Wildlife Collection				unknown	This study (Andrew Iwaniuk unpublished data)
Anseriformes	Anatidae	Oxyura	australis		Oxyura_australis	m	1	4.07	Vol		420	MV B17662	Museum Victoria				unknown	This study (Andrew Iwaniuk unpublished data)
Anseriformes	Anatidae	Oxyura	australis		Oxyura_australis	m	1	3.84	Vol		560	MV B19202	Museum Victoria				unknown	This study (Andrew Iwaniuk unpublished data)
Anseriformes	Anatidae	Oxyura	australis		Oxyura_australis	m	1	3.9	Vol		560	MV B19202	Museum Victoria				unknown	This study (Andrew Iwaniuk unpublished data)
Anseriformes	Anatidae	Oxyura	australis		Oxyura_australis	m	1	4.48	Vol		590	MV B19206	Museum Victoria				unknown	This study (Andrew Iwaniuk unpublished data)
Anseriformes	Anatidae	Oxyura	jamaicensis	jamaicensis	Oxyura_jamaicensis	f	1	3.67	Vol		530	AMWC22640	Australian National Wildlife Collection				unknown	This study (Andrew Iwaniuk unpublished data)
Anseriformes	Anatidae	Oxyura	jamaicensis	jamaicensis	Oxyura_jamaicensis	f	1	4.66	Vol		425	FMNH 395638	Field Museum of Natural History				unknown	This study (Andrew Iwaniuk unpublished data)
Anseriformes	Anatidae	Oxyura	jamaicensis	jamaicensis	Oxyura_jamaicensis	f	1	3.3	Vol		453	PMA 79.101.82	Royal Alberta Museum				unknown	This study (Andrew Iwaniuk unpublished data)
Anseriformes	Anatidae	Oxyura	jamaicensis	jamaicensis	Oxyura_jamaicensis	f	1	3.3	Vol		409.9	PMA 80.20.75	Royal Alberta Museum				unknown	This study (Andrew Iwaniuk unpublished data)
Anseriformes	Anatidae	Oxyura	jamaicensis	jamaicensis	Oxyura_jamaicensis	m	1	4.02	Vol		308	FMNH431065	Field Museum of Natural History				unknown	This study (Andrew Iwaniuk unpublished data)
Anseriformes	Anatidae	Oxyura	jamaicensis	jamaicensis	Oxyura_jamaicensis	m	1	3.6	Vol		621.5	PMA 72.102.19	Royal Alberta Museum				unknown	This study (Andrew Iwaniuk unpublished data)
Anseriformes	Anatidae	Oxyura	jamaicensis	jamaicensis	Oxyura_jamaicensis	m	1	3.3	Vol		619.6	PMA 75.2.1	Royal Alberta Museum				unknown	This study (Andrew Iwaniuk unpublished data)
Anseriformes	Anatidae	Oxyura	jamaicensis	jamaicensis	Oxyura_jamaicensis	m	1	3.8	Vol		664.2	PMA 83.31.1	Royal Alberta Museum				unknown	This study (Andrew Iwaniuk unpublished data)
Anseriformes	Anatidae	Oxyura	jamaicensis	jamaicensis	Oxyura_jamaicensis	m	1	3.9	Vol		636	PMA 83.32.15	Royal Alberta Museum				unknown	This study (Andrew Iwaniuk unpublished data)
Anseriformes	Anatidae	Oxyura	jamaicensis	jamaicensis	Oxyura_jamaicensis	m	1	3.8	Vol		672.2	PMA 83.32.9	Royal Alberta Museum				unknown	This study (Andrew Iwaniuk unpublished data)
Anseriformes	Anatidae	Oxyura	jamaicensis	jamaicensis	Oxyura_jamaicensis	m	1	4	Vol		590.3	PMA 88.5.1	Royal Alberta Museum				unknown	This study (Andrew Iwaniuk unpublished data)
Anseriformes	Anatidae	Oxyura	maccoa		Oxyura_maccoa	f	1	4.4	Vol		750	USNM558443	National Museum of Natural History				unknown	This study (Andrew Iwaniuk unpublished data)
Anseriformes	Anatidae	Oxyura	maccoa		Oxyura_maccoa	m	1	4.95	Vol		975	USNM558442	National Museum of Natural History				unknown	This study (Andrew Iwaniuk unpublished data)
Anseriformes	Anatidae	Polysticta	stelleri		Polysticta_stelleri	f	1	5.2	Vol		850	ANWC22612	Australian National Wildlife Collection				unknown	This study (Andrew Iwaniuk unpublished data)
Anseriformes	Anatidae	Polysticta	stelleri		Polysticta_stelleri	f	1	5.4	Vol		812	USNM491637	National Museum of Natural History				unknown	This study (Andrew Iwaniuk unpublished data)
Anseriformes	Anatidae	Polysticta	stelleri		Polysticta_stelleri	m	1	5	Vol		950	ANWC22611	Australian National Wildlife Collection				unknown	This study (Andrew Iwaniuk unpublished data)
Anseriformes	Anatidae	Polysticta	stelleri		Polysticta_stelleri	m	1	5.15	Vol		950	USNM561199	National Museum of Natural History				unknown	This study (Andrew Iwaniuk unpublished data)
Anseriformes	Anatidae	Sarkidiornis	melanotos		Sarkidiornis_melanotos	f	1	5.85	Vol		650	ROM120738	Royal Ontario Museum				unknown	This study (Andrew Iwaniuk unpublished data)
Anseriformes	Anatidae	Sarkidiornis	melanotos		Sarkidiornis_melanotos	m	1	6.41	Vol		1580.8	ROM114652	Royal Ontario Museum				unknown	This study (Andrew Iwaniuk unpublished data)
Anseriformes	Anatidae	Somateria	fischeri		Somateria_fischeri	f	1	6.38	Vol		1240	AMNH26337	Amrcian Museum of Natural History				unknown	This study (Andrew Iwaniuk unpublished data)
Anseriformes	Anatidae	Somateria	fischeri		Somateria_fischeri	m	1	6.44	Vol		1281.4	BNHM160721	Barkeley Natural History Museums				unknown	This study (Andrew Iwaniuk unpublished data)
Anseriformes	Anatidae	Somateria	fischeri		Somateria_fischeri	m	1	6.57	Vol		1027.8	BM32082	Burke Museum of Natural History				unknown	This study (Andrew Iwaniuk unpublished data)
Anseriformes	Anatidae	Somateria	mollissima	dresseri	Somateria_mollissima	f	1	7.17	Vol		1529.4	ROM131113	Royal Ontario Museum				unknown	This study (Andrew Iwaniuk unpublished data)
Anseriformes	Anatidae	Somateria	mollissima	dresseri	Somateria_mollissima	m	1	7.27	Vol		1224.6	ROM106416	Royal Ontario Museum				unknown	This study (Andrew Iwaniuk unpublished data)
Anseriformes	Anatidae	Somateria	mollissima	dresseri	Somateria_mollissima	m	1	8.01	Vol		1765	ROM156155	Royal Ontario Museum				unknown	This study (Andrew Iwaniuk unpublished data)
Anseriformes	Anatidae	Somateria	mollissima	faeroeensis	Somateria_mollissima	f	1	7.43	Vol		1737	ZMUC collection	Zoological Museum at University of Copenhagen				unknown	This study (Andrew Iwaniuk unpublished data)
Anseriformes	Anatidae	Somateria	mollissima	faeroeensis	Somateria_mollissima	m	1	8.24	Vol		1720	ZMUC collection	Zoological Museum at University of Copenhagen				unknown	This study (Andrew Iwaniuk unpublished data)
Anseriformes	Anatidae	Somateria	mollissima	mollissima	Somateria_mollissima	f	1	7.08	Vol		1713	ZMUC collection	Zoological Museum at University of Copenhagen				unknown	This study (Andrew Iwaniuk unpublished data)
Anseriformes	Anatidae	Somateria	mollissima	mollissima	Somateria_mollissima	f	1	7.48	Vol		2260	ZMUC collection	Zoological Museum at University of Copenhagen				unknown	This study (Andrew Iwaniuk unpublished data)
Anseriformes	Anatidae	Somateria	mollissima	mollissima	Somateria_mollissima	f	1	7.63	Vol		2285	ZMUC collection	Zoological Museum at University of Copenhagen				unknown	This study (Andrew Iwaniuk unpublished data)
Anseriformes	Anatidae	Somateria	mollissima	mollissima	Somateria_mollissima	f	1		Mass	7.002	2000	HoBR Not registered	House of Bird Research collection	11-8-1999			Adult	This study (Johannes Erritzøe House of Bird Research collection)
Anseriformes	Anatidae	Somateria	mollissima	mollissima	Somateria_mollissima	f	1		Mass	7.741	1970	HoBR Not registered	House of Bird Research collection	12-30-1994			Adult	This study (Johannes Erritzøe House of Bird Research collection)
Anseriformes	Anatidae	Somateria	mollissima	mollissima	Somateria_mollissima	f	1		Mass	7.147	2200	HoBR Not registered	House of Bird Research collection	10-12-2001			Adult	This study (Johannes Erritzøe House of Bird Research collection)
Anseriformes	Anatidae	Somateria	mollissima	mollissima	Somateria_mollissima	f	1		Mass	8.04	1740	HoBR Not registered	House of Bird Research collection				Adult	This study (Johannes Erritzøe House of Bird Research collection)
Anseriformes	Anatidae	Somateria	mollissima	mollissima	Somateria_mollissima	m	1		Mass	0.9	2300	HoBR Not registered	House of Bird Research collection	2-18-1993			Adult	This study (Johannes Erritzøe House of Bird Research collection)
Anseriformes	Anatidae	Somateria	mollissima	mollissima	Somateria_mollissima	m	1		Mass	7.684	1940	HoBR Not registered	House of Bird Research collection	11-7-1995			Adult	This study (Johannes Erritzøe House of Bird Research collection)
Anseriformes	Anatidae	Somateria	mollissima	mollissima	Somateria_mollissima	m	1		Mass	8.032	1710	HoBR Not registered	House of Bird Research collection	4-4-1996			Adult	This study (Johannes Erritzøe House of Bird Research collection)
Anseriformes	Anatidae	Somateria	mollissima	mollissima	Somateria_mollissima	m	1		Mass	6.996	2250	HoBR Not registered	House of Bird Research collection	5-2-1993			Adult	This study (Johannes Erritzøe House of Bird Research collection)
Anseriformes	Anatidae	Somateria	mollissima	mollissima	Somateria_mollissima	m	1		Mass	7.5	2280	HoBR Not registered	House of Bird Research collection	1992			Adult	This study (Johannes Erritzøe House of Bird Research collection)
Anseriformes	Anatidae	Somateria	mollissima	mollissima	Somateria_mollissima	m	1		Mass	8.6	2380	HoBR Not registered	House of Bird Research collection	12-13-1992			Adult	This study (Johannes Erritzøe House of Bird Research collection)
Anseriformes	Anatidae	Somateria	mollissima	mollissima	Somateria_mollissima	m	1		Mass	6.839	2300	HoBR Not registered	House of Bird Research collection	10-12-2001			Adult	This study (Johannes Erritzøe House of Bird Research collection)
Anseriformes	Anatidae	Somateria	mollissima	mollissima	Somateria_mollissima	m	1		Mass	8.695	1800	HoBR Not registered	House of Bird Research collection	10-27-2002			Adult	This study (Johannes Erritzøe House of Bird Research collection)
Anseriformes	Anatidae	Somateria	mollissima	mollissima	Somateria_mollissima	m	1		Mass	8.577	2390	HoBR Not registered	House of Bird Research collection				Adult	This study (Johannes Erritzøe House of Bird Research collection)
Anseriformes	Anatidae	Somateria	mollissima	mollissima	Somateria_mollissima	m	1		Mass	8.5	1540	HoBR Not registered	House of Bird Research collection				Adult	This study (Johannes Erritzøe House of Bird Research collection)
Anseriformes	Anatidae	Somateria	mollissima	mollissima	Somateria_mollissima	m	1		Mass	7.35	1970	HoBR Not registered	House of Bird Research collection				Adult	This study (Johannes Erritzøe House of Bird Research collection)
Anseriformes	Anatidae	Somateria	mollissima	mollissima	Somateria_mollissima	m	1		Mass	8.28	2180	HoBR Not registered	House of Bird Research collection				Adult	This study (Johannes Erritzøe House of Bird Research collection)
Anseriformes	Anatidae	Somateria	mollissima	mollissima	Somateria_mollissima	m	1		Mass	7.8	2200	HoBR Not registered	House of Bird Research collection				Adult	This study (Johannes Erritzøe House of Bird Research collection)
Anseriformes	Anatidae	Somateria	mollissima	mollissima	Somateria_mollissima	m	1		Mass	6.9	2305	HoBR Not registered	House of Bird Research collection				Adult	This study (Johannes Erritzøe House of Bird Research collection)
Anseriformes	Anatidae	Somateria	mollissima	mollissima	Somateria_mollissima	m	1		Mass	7.77	2320	HoBR Not registered	House of Bird Research collection				Adult	This study (Johannes Erritzøe House of Bird Research collection)
Anseriformes	Anatidae	Somateria	mollissima	mollissima	Somateria_mollissima	m	1		Mass	7.5	2340	HoBR Not registered	House of Bird Research collection				Adult	This study (Johannes Erritzøe House of Bird Research collection)
Anseriformes	Anatidae	Somateria	mollissima	mollissima	Somateria_mollissima	m	1		Mass	9.35	2370	HoBR Not registered	House of Bird Research collection				Adult	This study (Johannes Erritzøe House of Bird Research collection)
Anseriformes	Anatidae	Somateria	mollissima	mollissima	Somateria_mollissima	m	1		Mass	7.43	2400	HoBR Not registered	House of Bird Research collection				Adult	This study (Johannes Erritzøe House of Bird Research collection)
Anseriformes	Anatidae	Somateria	mollissima	mollissima	Somateria_mollissima	m	1		Mass	7.18	2440	HoBR Not registered	House of Bird Research collection				Adult	This study (Johannes Erritzøe House of Bird Research collection)
Anseriformes	Anatidae	Somateria	mollissima	mollissima	Somateria_mollissima	m	1		Mass	8.1	2510	HoBR Not registered	House of Bird Research collection				Adult	This study (Johannes Erritzøe House of Bird Research collection)
Anseriformes	Anatidae	Somateria	mollissima	mollissima	Somateria_mollissima	m	1		Mass	8.7	2720	HoBR Not registered	House of Bird Research collection				Adult	This study (Johannes Erritzøe House of Bird Research collection)
Anseriformes	Anatidae	Somateria	spectabilis		Somateria_spectabilis	f	1	6.59	Vol		1550	FMNH364800	Field Museum of Natural History				unknown	This study (Andrew Iwaniuk unpublished data)
Anseriformes	Anatidae	Somateria	spectabilis		Somateria_spectabilis	f	1	7.4	Vol		1300	USNM561213	National Museum of Natural History				unknown	This study (Andrew Iwaniuk unpublished data)
Anseriformes	Anatidae	Somateria	spectabilis		Somateria_spectabilis	f	1	7.1	Vol		1030	USNM620819	National Museum of Natural History				unknown	This study (Andrew Iwaniuk unpublished data)
Anseriformes	Anatidae	Somateria	spectabilis		Somateria_spectabilis	f	1	7.1	Vol		1060	USNM620820	National Museum of Natural History				unknown	This study (Andrew Iwaniuk unpublished data)
Anseriformes	Anatidae	Somateria	spectabilis		Somateria_spectabilis	f	1	6.7	Vol		995	USNM620821	National Museum of Natural History				unknown	This study (Andrew Iwaniuk unpublished data)
Anseriformes	Anatidae	Somateria	spectabilis		Somateria_spectabilis	f	1	6.4	Vol		1450	PMA 87.19.2	Royal Alberta Museum				unknown	This study (Andrew Iwaniuk unpublished data)
Anseriformes	Anatidae	Somateria	spectabilis		Somateria_spectabilis	f	1	6.5	Vol		1320	ROM160237	Royal Ontario Museum				unknown	This study (Andrew Iwaniuk unpublished data)
Anseriformes	Anatidae	Somateria	spectabilis		Somateria_spectabilis	f	1	6.86	Vol		1680	ROM160239	Royal Ontario Museum				unknown	This study (Andrew Iwaniuk unpublished data)
Anseriformes	Anatidae	Somateria	spectabilis		Somateria_spectabilis	f	1	7.42	Vol		1550	ROM160262	Royal Ontario Museum				unknown	This study (Andrew Iwaniuk unpublished data)
Anseriformes	Anatidae	Somateria	spectabilis		Somateria_spectabilis	m	1	7.41	Vol		1700	ANWC22608	Australian National Wildlife Collection				unknown	This study (Andrew Iwaniuk unpublished data)
Anseriformes	Anatidae	Somateria	spectabilis		Somateria_spectabilis	m	1	7.75	Vol		1750	USNM561200	National Museum of Natural History				unknown	This study (Andrew Iwaniuk unpublished data)
Anseriformes	Anatidae	Somateria	spectabilis		Somateria_spectabilis	m	1	8.3	Vol		1550	USNM620822	National Museum of Natural History				unknown	This study (Andrew Iwaniuk unpublished data)
Anseriformes	Anatidae	Somateria	spectabilis		Somateria_spectabilis	m	1	8.2	Vol		1250	USNM620824	National Museum of Natural History				unknown	This study (Andrew Iwaniuk unpublished data)
Anseriformes	Anatidae	Somateria	spectabilis		Somateria_spectabilis	m	1	8	Vol		1250	USNM620825	National Museum of Natural History				unknown	This study (Andrew Iwaniuk unpublished data)
Anseriformes	Anatidae	Somateria	spectabilis		Somateria_spectabilis	m	1	6.9	Vol		1550	PMA 87.19.4	Royal Alberta Museum				unknown	This study (Andrew Iwaniuk unpublished data)
Anseriformes	Anatidae	Somateria	spectabilis		Somateria_spectabilis	m	1	7.63	Vol		1750	ROM160250	Royal Ontario Museum				unknown	This study (Andrew Iwaniuk unpublished data)
Anseriformes	Anatidae	Somateria	spectabilis		Somateria_spectabilis	m	1		Mass	7.838	1200	HoBR365301	House of Bird Research collection	2-25-1996	St. Paul Is. Alaska	57.13N 170.27W	Adult	This study (Johannes Erritzøe House of Bird Research collection)
Anseriformes	Anatidae	Somateria	spectabilis		Somateria_spectabilis	m	1		Mass	7.3	1800	HoBR Not registered	House of Bird Research collection				Adult	This study (Johannes Erritzøe House of Bird Research collection)
Anseriformes	Anatidae	Speculanas	specularis		Speculanas_specularis	m	1	6.1	Vol		1217	USNM490860	National Museum of Natural History				unknown	This study (Andrew Iwaniuk unpublished data)
Anseriformes	Anatidae	Stictonetta	naevosa		Stictonetta_naevosa	f	1	4.2	Vol		870	ANWC22271	Australian National Wildlife Collection				unknown	This study (Andrew Iwaniuk unpublished data)
Anseriformes	Anatidae	Stictonetta	naevosa		Stictonetta_naevosa	f	1	4	Vol		800	ANWC22282	Australian National Wildlife Collection				unknown	This study (Andrew Iwaniuk unpublished data)
Anseriformes	Anatidae	Stictonetta	naevosa		Stictonetta_naevosa	f	1	3.9	Vol		800	ANWC22284	Australian National Wildlife Collection				unknown	This study (Andrew Iwaniuk unpublished data)
Anseriformes	Anatidae	Stictonetta	naevosa		Stictonetta_naevosa	f	1	4.25	Vol		870	ANWC22285	Australian National Wildlife Collection				unknown	This study (Andrew Iwaniuk unpublished data)
Anseriformes	Anatidae	Stictonetta	naevosa		Stictonetta_naevosa	f	1	4.3	Vol		810	ANWC22288	Australian National Wildlife Collection				unknown	This study (Andrew Iwaniuk unpublished data)
Anseriformes	Anatidae	Stictonetta	naevosa		Stictonetta_naevosa	f	1	3.93	Vol		708.3	MV B13698	Museum Victoria				unknown	This study (Andrew Iwaniuk unpublished data)
Anseriformes	Anatidae	Stictonetta	naevosa		Stictonetta_naevosa	f	1	4.08	Vol		810	MV B17253	Museum Victoria				unknown	This study (Andrew Iwaniuk unpublished data)
Anseriformes	Anatidae	Stictonetta	naevosa		Stictonetta_naevosa	f	1	3.93	Vol		795	MV B17257	Museum Victoria				unknown	This study (Andrew Iwaniuk unpublished data)
Anseriformes	Anatidae	Stictonetta	naevosa		Stictonetta_naevosa	f	1	3.96	Vol		694	MV B17261	Museum Victoria				unknown	This study (Andrew Iwaniuk unpublished data)
Anseriformes	Anatidae	Stictonetta	naevosa		Stictonetta_naevosa	f	1	4.45	Vol		882.2	MV B17592	Museum Victoria				unknown	This study (Andrew Iwaniuk unpublished data)
Anseriformes	Anatidae	Stictonetta	naevosa		Stictonetta_naevosa	f	1	3.96	Vol		750	MV B19251	Museum Victoria				unknown	This study (Andrew Iwaniuk unpublished data)
Anseriformes	Anatidae	Stictonetta	naevosa		Stictonetta_naevosa	m	1	4.9	Vol		900	ANWC22326	Australian National Wildlife Collection				unknown	This study (Andrew Iwaniuk unpublished data)
Anseriformes	Anatidae	Stictonetta	naevosa		Stictonetta_naevosa	m	1	4.3	Vol		885	ANWC22329	Australian National Wildlife Collection				unknown	This study (Andrew Iwaniuk unpublished data)
Anseriformes	Anatidae	Stictonetta	naevosa		Stictonetta_naevosa	m	1	4.9	Vol		1040	ANWC22330	Australian National Wildlife Collection				unknown	This study (Andrew Iwaniuk unpublished data)
Anseriformes	Anatidae	Stictonetta	naevosa		Stictonetta_naevosa	m	1	4.7	Vol		950	ANWC22331	Australian National Wildlife Collection				unknown	This study (Andrew Iwaniuk unpublished data)
Anseriformes	Anatidae	Stictonetta	naevosa		Stictonetta_naevosa	m	1	4.78	Vol		1105	MV B13653	Museum Victoria				unknown	This study (Andrew Iwaniuk unpublished data)
Anseriformes	Anatidae	Stictonetta	naevosa		Stictonetta_naevosa	m	1	4.24	Vol		997.8	MV B17250	Museum Victoria				unknown	This study (Andrew Iwaniuk unpublished data)
Anseriformes	Anatidae	Stictonetta	naevosa		Stictonetta_naevosa	m	1	4.81	Vol		1102	SAM B32912	South Australian Museum				unknown	This study (Andrew Iwaniuk unpublished data)
Anseriformes	Anatidae	Tachyeres	brachypterus		Tachyeres_brachypterus	f	1	9.75	Vol		3300	Kansas80514					unknown	This study (Andrew Iwaniuk unpublished data)
Anseriformes	Anatidae	Tachyeres	brachypterus		Tachyeres_brachypterus	f	1	10.27	Vol		3900	Kansas80516					unknown	This study (Andrew Iwaniuk unpublished data)
Anseriformes	Anatidae	Tachyeres	brachypterus		Tachyeres_brachypterus	m	1	10.39	Vol		4550	Kansas80519					unknown	This study (Andrew Iwaniuk unpublished data)
Anseriformes	Anatidae	Tachyeres	brachypterus		Tachyeres_brachypterus	m	1	10.48	Vol		4100	Kansas80530					unknown	This study (Andrew Iwaniuk unpublished data)
Anseriformes	Anatidae	Tachyeres	leucocephalus		Tachyeres_leucocephalus	f	1	8.73	Vol		2800	FMNH338932	Field Museum of Natural History				unknown	This study (Andrew Iwaniuk unpublished data)
Anseriformes	Anatidae	Tachyeres	leucocephalus		Tachyeres_leucocephalus	f	1	9.3	Vol		3050	Kansas79239					unknown	This study (Andrew Iwaniuk unpublished data)
Anseriformes	Anatidae	Tachyeres	leucocephalus		Tachyeres_leucocephalus	f	1	8.73	Vol		2550	Kansas79240					unknown	This study (Andrew Iwaniuk unpublished data)
Anseriformes	Anatidae	Tachyeres	leucocephalus		Tachyeres_leucocephalus	m	1	10.39	Vol		3700	BM42974	Burke Museum of Natural History				unknown	This study (Andrew Iwaniuk unpublished data)
Anseriformes	Anatidae	Tachyeres	leucocephalus		Tachyeres_leucocephalus	m	1	10.2	Vol		3500	MV B14144	Museum Victoria				unknown	This study (Andrew Iwaniuk unpublished data)
Anseriformes	Anatidae	Tachyeres	leucocephalus		Tachyeres_leucocephalus	m	1	10.22	Vol		4160	MV B14144	Museum Victoria				unknown	This study (Andrew Iwaniuk unpublished data)
Anseriformes	Anatidae	Tachyeres	leucocephalus		Tachyeres_leucocephalus	m	1	10.77	Vol		4150	Kansas79246					unknown	This study (Andrew Iwaniuk unpublished data)
Anseriformes	Anatidae	Tachyeres	patachonicus		Tachyeres_patachonicus	f	1	8.31	Vol		2125	FMNH338930	Field Museum of Natural History				unknown	This study (Andrew Iwaniuk unpublished data)
Anseriformes	Anatidae	Tachyeres	patachonicus		Tachyeres_patachonicus	f	1	8.35	Vol		2560	USNM491014	National Museum of Natural History				unknown	This study (Andrew Iwaniuk unpublished data)
Anseriformes	Anatidae	Tachyeres	patachonicus		Tachyeres_patachonicus	f	1	8.59	Vol		2275	Kansas79853					unknown	This study (Andrew Iwaniuk unpublished data)
Anseriformes	Anatidae	Tachyeres	patachonicus		Tachyeres_patachonicus	f	1	9.29	Vol		2500	Kansas79854					unknown	This study (Andrew Iwaniuk unpublished data)
Anseriformes	Anatidae	Tachyeres	patachonicus		Tachyeres_patachonicus	m	1	9.8	Vol		3000	USNM491013	National Museum of Natural History				unknown	This study (Andrew Iwaniuk unpublished data)
Anseriformes	Anatidae	Tachyeres	patachonicus		Tachyeres_patachonicus	m	1	8.35	Vol		2700	Kansas79840					unknown	This study (Andrew Iwaniuk unpublished data)
Anseriformes	Anatidae	Tachyeres	patachonicus		Tachyeres_patachonicus	m	1	8.55	Vol		2750	Kansas79844					unknown	This study (Andrew Iwaniuk unpublished data)
Anseriformes	Anatidae	Tachyeres	pteneres		Tachyeres_pteneres	f	1	10.6	Vol		4100	USNM490942	National Museum of Natural History				unknown	This study (Andrew Iwaniuk unpublished data)
Anseriformes	Anatidae	Tachyeres	pteneres		Tachyeres_pteneres	m	1	11.74	Vol		5400	FMNH338928	Field Museum of Natural History				unknown	This study (Andrew Iwaniuk unpublished data)
Anseriformes	Anatidae	Tachyeres	pteneres		Tachyeres_pteneres	m	1	10.6	Vol		5600	USNM490930	National Museum of Natural History				unknown	This study (Andrew Iwaniuk unpublished data)
Anseriformes	Anatidae	Tachyeres	pteneres		Tachyeres_pteneres	m	1	10.7	Vol		5100	USNM490939	National Museum of Natural History				unknown	This study (Andrew Iwaniuk unpublished data)
Anseriformes	Anatidae	Tachyeres	pteneres		Tachyeres_pteneres	m	1	11.29	Vol		5050	Kansas79179					unknown	This study (Andrew Iwaniuk unpublished data)
Anseriformes	Anatidae	Tadorna	ferruginea		Tadorna_ferruginea	m	1	5.7	Vol		1150	BM46399	Burke Museum of Natural History				unknown	This study (Andrew Iwaniuk unpublished data)
Anseriformes	Anatidae	Tadorna	radjah	ssp.	Tadorna_radjah	m	1	4.85	Vol		1110	ANWC22411	Australian National Wildlife Collection				unknown	This study (Andrew Iwaniuk unpublished data)
Anseriformes	Anatidae	Tadorna	tadorna		Tadorna_tadorna	f	1	4.7	Vol		1050	USNM621194	National Museum of Natural History				unknown	This study (Andrew Iwaniuk unpublished data)
Anseriformes	Anatidae	Tadorna	tadorna		Tadorna_tadorna	f	1		Mass	4.88	676	HoBR171789	House of Bird Research collection				Adult	This study (Johannes Erritzøe House of Bird Research collection)
Anseriformes	Anatidae	Tadorna	tadorna		Tadorna_tadorna	m	1	5.25	Vol		900	USNM432291	National Museum of Natural History				unknown	This study (Andrew Iwaniuk unpublished data)
Anseriformes	Anatidae	Tadorna	tadorna		Tadorna_tadorna	m	1	5.6	Vol		860	USNM555155	National Museum of Natural History				unknown	This study (Andrew Iwaniuk unpublished data)
Anseriformes	Anatidae	Tadorna	tadorna		Tadorna_tadorna	m	1	5.3	Vol		1100	USNM621193	National Museum of Natural History				unknown	This study (Andrew Iwaniuk unpublished data)
Anseriformes	Anatidae	Tadorna	tadorna		Tadorna_tadorna	m	1		Mass	4.329	1340	HoBR353425	House of Bird Research collection	2-19-2011	Rømø, DK	55.09N 08.31E	Adult	This study (Johannes Erritzøe House of Bird Research collection)
Anseriformes	Anatidae	Tadorna	tadorna		Tadorna_tadorna	m	1		Mass	4.888	1295	HoBR339309	House of Bird Research collection	5-17-2010	Nakskov, DK	55.54N 12.30E	Adult	This study (Johannes Erritzøe House of Bird Research collection)
Anseriformes	Anatidae	Tadorna	tadorna		Tadorna_tadorna	m	1		Mass	5.546	1512	HoBR308365	House of Bird Research collection	3-3-2000	Omø, DK	55.57N 10.26E	Adult	This study (Johannes Erritzøe House of Bird Research collection)
Anseriformes	Anatidae	Tadorna	tadorna		Tadorna_tadorna	m	1		Mass	5.16	1410	HoBR166596	House of Bird Research collection				Adult	This study (Johannes Erritzøe House of Bird Research collection)
Anseriformes	Anatidae	Tadorna	tadornoides		Tadorna_tadornoides	f	1	4.9	Vol		950	ANWC22407	Australian National Wildlife Collection				unknown	This study (Andrew Iwaniuk unpublished data)
Anseriformes	Anatidae	Tadorna	tadornoides		Tadorna_tadornoides	f	1	5.7	Vol		1400	MV B19357	Museum Victoria				unknown	This study (Andrew Iwaniuk unpublished data)
Anseriformes	Anatidae	Tadorna	tadornoides		Tadorna_tadornoides	f	1	5.46	Vol		1423	SAM B46462	South Australian Museum				unknown	This study (Andrew Iwaniuk unpublished data)
Anseriformes	Anatidae	Tadorna	variegata		Tadorna_variegata	f	1	5.18	Vol		1437	MONZ24559	Museum of New Zealand Te Papa Tongarewa				unknown	This study (Andrew Iwaniuk unpublished data)
Anseriformes	Anatidae	Tadorna	variegata		Tadorna_variegata	f	1	5.39	Vol		1610	ROM111731	Royal Ontario Museum				unknown	This study (Andrew Iwaniuk unpublished data)
Anseriformes	Anatidae	Tadorna	variegata		Tadorna_variegata	m	1	5.62	Vol		1595	MONZ25139	Museum of New Zealand Te Papa Tongarewa				unknown	This study (Andrew Iwaniuk unpublished data)
Anseriformes	Anatidae	Tadorna	variegata		Tadorna_variegata	m	1	6.15	Vol		1520	USNM621375	National Museum of Natural History				unknown	This study (Andrew Iwaniuk unpublished data)
Anseriformes	Anseranatidae	Anseranas	semipalmata		Anseranas_semipalmata	f	1	8	Vol		1800	ANWC22191	Australian National Wildlife Collection				unknown	This study (Andrew Iwaniuk unpublished data)
Anseriformes	Anseranatidae	Anseranas	semipalmata		Anseranas_semipalmata	f	1	8.98	Vol		2400	ANWC47605	Australian National Wildlife Collection				unknown	This study (Andrew Iwaniuk unpublished data)
Anseriformes	Anseranatidae	Anseranas	semipalmata		Anseranas_semipalmata	f	1	9.05	Vol		2500	ANWC47606	Australian National Wildlife Collection				unknown	This study (Andrew Iwaniuk unpublished data)
Anseriformes	Anseranatidae	Anseranas	semipalmata		Anseranas_semipalmata	f	1	9.54	Vol		1623	MV B12964	Museum Victoria				unknown	This study (Andrew Iwaniuk unpublished data)
Anseriformes	Anseranatidae	Anseranas	semipalmata		Anseranas_semipalmata	m	1	7.98	Vol		1900	ANWC22186	Australian National Wildlife Collection				unknown	This study (Andrew Iwaniuk unpublished data)
Anseriformes	Anseranatidae	Anseranas	semipalmata		Anseranas_semipalmata	m	1	9.17	Vol		2380	ANWC22187	Australian National Wildlife Collection				unknown	This study (Andrew Iwaniuk unpublished data)
Anseriformes	Anseranatidae	Anseranas	semipalmata		Anseranas_semipalmata	m	1	8.9	Vol		2650	ANWC22189	Australian National Wildlife Collection				unknown	This study (Andrew Iwaniuk unpublished data)
Anseriformes	Anseranatidae	Anseranas	semipalmata		Anseranas_semipalmata	m	1	9.16	Vol		2700	ANWC47595	Australian National Wildlife Collection				unknown	This study (Andrew Iwaniuk unpublished data)
Anseriformes	Anseranatidae	Anseranas	semipalmata		Anseranas_semipalmata	m	1	10.95	Vol		2800	ANWC47607	Australian National Wildlife Collection				unknown	This study (Andrew Iwaniuk unpublished data)
Anseriformes	Anseridae	Branta	ruficollis		Branta_ruficollis	f	1	4.44	Vol		2000	ROM127223	Royal Ontario Museum				unknown	This study (Andrew Iwaniuk unpublished data)
Anseriformes	Anseridae	Branta	ruficollis		Branta_ruficollis	m	1		Mass	5.398	1060	HoBR354035	House of Bird Research collection		captivity		Adult	This study (Johannes Erritzøe House of Bird Research collection)
Apodiformes	Apodidae	Apus	apus	apus	Apus_apus	f	1		Mass	0.62	33.93	HoBR290711	House of Bird Research collection	6-23-1996	Sønderborg, DK	54.55N 09.45E	Adult	This study (Johannes Erritzøe House of Bird Research collection)
Apodiformes	Apodidae	Apus	apus	apus	Apus_apus	f	1		Mass	0.7	47.8	HoBR257579	House of Bird Research collection	6-5-1993	Kolding, DK,	55.29N 09.28E	Adult	This study (Johannes Erritzøe House of Bird Research collection)
Apodiformes	Apodidae	Apus	apus	apus	Apus_apus	f	1		Mass	0.75	46.95	HoBR171674	House of Bird Research collection	8-7-1986	Dragør, DK	55.36N 12.41E	Adult	This study (Johannes Erritzøe House of Bird Research collection)
Apodiformes	Apodidae	Apus	apus	apus	Apus_apus	f	1		Mass	0.58	40.01	HoBR117387	House of Bird Research collection	6-9-1983	Skagen, DK	57.43N 10,35E	Adult	This study (Johannes Erritzøe House of Bird Research collection)
Apodiformes	Apodidae	Apus	apus	apus	Apus_apus	f	1		Mass	0.673	28.65	HoBR200030	House of Bird Research collection	7-20-1987	Skagen, DK	57.43N 10,35E	Adult	This study (Johannes Erritzøe House of Bird Research collection)
Apodiformes	Apodidae	Apus	apus	apus	Apus_apus	f	1		Mass	0.62	42.6	HoBR171832	House of Bird Research collection				Adult	This study (Johannes Erritzøe House of Bird Research collection)
Apodiformes	Apodidae	Apus	apus	apus	Apus_apus	m	1		Mass	0.551	23.32	HoBR353561	House of Bird Research collection	8-27-2011	Christiansfeld, DK	55.21N 09.29E	Adult	This study (Johannes Erritzøe House of Bird Research collection)
Apodiformes	Apodidae	Apus	apus	apus	Apus_apus	m	1		Mass	0.914	44.82	HoBR328619	House of Bird Research collection	7-25-2003	Christiansfeld, DK	55.21N 09.29E	Adult	This study (Johannes Erritzøe House of Bird Research collection)
Apodiformes	Apodidae	Apus	apus	apus	Apus_apus	m	1		Mass	0.599	26.56	HoBR286651	House of Bird Research collection	1997	Copenhagen, DK	55.41N 12.31E	Adult	This study (Johannes Erritzøe House of Bird Research collection)
Apodiformes	Apodidae	Apus	apus	apus	Apus_apus	m	1		Mass	0.73	38.6	HoBR235695	House of Bird Research collection				Adult	This study (Johannes Erritzøe House of Bird Research collection)
Apodiformes	Apodidae	Apus	apus		Apus_apus	f	1	0.84	Vol		49.6	USNM488804	National Museum of Natural History				unknown	This study (Andrew Iwaniuk unpublished data)
Apodiformes	Apodidae	Apus	apus		Apus_apus	f	1	0.63	Vol		43.2	USNM620285	National Museum of Natural History				unknown	This study (Andrew Iwaniuk unpublished data)
Apodiformes	Apodidae	Apus	apus		Apus_apus	f	1	0.73	Vol		53.5	USNM621211	National Museum of Natural History				unknown	This study (Andrew Iwaniuk unpublished data)
Apodiformes	Apodidae	Apus	apus		Apus_apus	f	1	0.75	Vol		34	USNM621338	National Museum of Natural History				unknown	This study (Andrew Iwaniuk unpublished data)
Apodiformes	Apodidae	Collocalia	esculenta		Collocalia_esculenta	f	1	0.18	Vol		5.6	USNM561604	National Museum of Natural History				unknown	This study (Andrew Iwaniuk unpublished data)
Apodiformes	Apodidae	Collocalia	esculenta		Collocalia_esculenta	m	1	0.185	Vol		5	AMO64560	Australian Museum				unknown	This study (Andrew Iwaniuk unpublished data)
Apodiformes	Apodidae	Collocalia	spodiopygia		Collocalia_spodiopygia	f	1	0.25	Vol		7.2	USNM561578	National Museum of Natural History				unknown	This study (Andrew Iwaniuk unpublished data)
Apodiformes	Apodidae	Collocalia	spodiopygia		Collocalia_spodiopygia	f	1	0.24	Vol		6	USNM561583	National Museum of Natural History				unknown	This study (Andrew Iwaniuk unpublished data)
Apodiformes	Apodidae	Collocalia	spodiopygia		Collocalia_spodiopygia	f	1	0.23	Vol		8.4	USNM561585	National Museum of Natural History				unknown	This study (Andrew Iwaniuk unpublished data)
Apodiformes	Apodidae	Collocalia	spodiopygia		Collocalia_spodiopygia	f	1	0.24	Vol		7.2	USNM561589	National Museum of Natural History				unknown	This study (Andrew Iwaniuk unpublished data)
Apodiformes	Apodidae	Collocalia	spodiopygia		Collocalia_spodiopygia	f	1	0.25	Vol		6.6	USNM561599	National Museum of Natural History				unknown	This study (Andrew Iwaniuk unpublished data)
Apodiformes	Apodidae	Collocalia	spodiopygia		Collocalia_spodiopygia	m	1	0.24	Vol		6.6	USNM561579	National Museum of Natural History				unknown	This study (Andrew Iwaniuk unpublished data)
Apodiformes	Apodidae	Collocalia	spodiopygia		Collocalia_spodiopygia	m	1	0.25	Vol		6	USNM561581	National Museum of Natural History				unknown	This study (Andrew Iwaniuk unpublished data)
Apodiformes	Apodidae	Collocalia	spodiopygia		Collocalia_spodiopygia	m	1	0.24	Vol		7.5	USNM561591	National Museum of Natural History				unknown	This study (Andrew Iwaniuk unpublished data)
Apodiformes	Apodidae	Collocalia	spodiopygia		Collocalia_spodiopygia	m	1	0.23	Vol		6	USNM561595	National Museum of Natural History				unknown	This study (Andrew Iwaniuk unpublished data)
Apodiformes	Apodidae	Collocalia	spodiopygia		Collocalia_spodiopygia	m	1	0.25	Vol		6.4	USNM561598	National Museum of Natural History				unknown	This study (Andrew Iwaniuk unpublished data)
Apodiformes	Apodidae	Hirundapus	caudacutus		Hirundapus_caudacutus	f	1	1.3	Vol		136.9	MV B11130	Museum Victoria				unknown	This study (Andrew Iwaniuk unpublished data)
Apodiformes	Apodidae	Hirundapus	caudacutus		Hirundapus_caudacutus	f	1	1.3	Vol		58.1	MV B20382	Museum Victoria				unknown	This study (Andrew Iwaniuk unpublished data)
Apodiformes	Apodidae	Hirundapus	caudacutus		Hirundapus_caudacutus	m	1	1.2	Vol		90	ANWC24015	Australian National Wildlife Collection				unknown	This study (Andrew Iwaniuk unpublished data)
Apodiformes	Apodidae	Hirundapus	caudacutus		Hirundapus_caudacutus	m	1	1.35	Vol		115.6	MV B13107	Museum Victoria				unknown	This study (Andrew Iwaniuk unpublished data)
Apodiformes	Apodidae	Hirundapus	caudacutus		Hirundapus_caudacutus	m	1	1.25	Vol		60	MV B19147	Museum Victoria				unknown	This study (Andrew Iwaniuk unpublished data)
Apodiformes	Apodidae	Hirundapus	caudacutus		Hirundapus_caudacutus	m	1	1.3	Vol		65	MV B19296	Museum Victoria				unknown	This study (Andrew Iwaniuk unpublished data)
Apodiformes	Apodidae	Hirundapus	caudacutus		Hirundapus_caudacutus	m	1	1.3	Vol		110	MV B19948	Museum Victoria				unknown	This study (Andrew Iwaniuk unpublished data)
Apodiformes	Apodidae	Hirundapus	caudacutus		Hirundapus_caudacutus	m	1	1.3	Vol		96.5	MV B20308	Museum Victoria				unknown	This study (Andrew Iwaniuk unpublished data)
Apodiformes	Apodidae	Streptoprocne	zonaris		Streptoprocne_zonaris	m	1	1.55	Vol		80	USNM614120	National Museum of Natural History				unknown	This study (Andrew Iwaniuk unpublished data)
Apodiformes	Apodidae	Tachornis	phoenicobia		Tachornis_phoenicobia	f	1	0.29	Vol		9.6	USNM555771	National Museum of Natural History				unknown	This study (Andrew Iwaniuk unpublished data)
Apodiformes	Apodidae	Tachornis	phoenicobia		Tachornis_phoenicobia	f	1	0.28	Vol		10.2	USNM555774	National Museum of Natural History				unknown	This study (Andrew Iwaniuk unpublished data)
Apodiformes	Apodidae	Tachornis	phoenicobia		Tachornis_phoenicobia	m	1	0.27	Vol		9	USNM553442	National Museum of Natural History				unknown	This study (Andrew Iwaniuk unpublished data)
Apodiformes	Apodidae	Tachornis	phoenicobia		Tachornis_phoenicobia	m	1	0.26	Vol		10.2	USNM555772	National Museum of Natural History				unknown	This study (Andrew Iwaniuk unpublished data)
Apodiformes	Apodidae	Tachornis	phoenicobia		Tachornis_phoenicobia	m	1	0.29	Vol		10.3	USNM555773	National Museum of Natural History				unknown	This study (Andrew Iwaniuk unpublished data)
Apodiformes	Apodidae	Tachornis	phoenicobia		Tachornis_phoenicobia	m	1	0.29	Vol		10.6	USNM555776	National Museum of Natural History				unknown	This study (Andrew Iwaniuk unpublished data)
Apodiformes	Trochilidae	Anthracothorax	dominicus		Anthracothorax_dominicus	m	1	0.213	Vol		6	USNM501733	National Museum of Natural History				unknown	This study (Andrew Iwaniuk unpublished data)
Apodiformes	Trochilidae	Anthracothorax	dominicus		Anthracothorax_dominicus	m	1	0.223	Vol		5.5	USNM554672	National Museum of Natural History				unknown	This study (Andrew Iwaniuk unpublished data)
Apodiformes	Trochilidae	Campylopterus	largipennis		Campylopterus_largipennis	f	1	0.314	Vol		7.2	USNM621399	National Museum of Natural History				unknown	This study (Andrew Iwaniuk unpublished data)
Apodiformes	Trochilidae	Campylopterus	largipennis		Campylopterus_largipennis	m	1	0.322	Vol		9	USNM620144	National Museum of Natural History				unknown	This study (Andrew Iwaniuk unpublished data)
Apodiformes	Trochilidae	Campylopterus	largipennis		Campylopterus_largipennis	m	1	0.308	Vol		9.6	USNM620145	National Museum of Natural History				unknown	This study (Andrew Iwaniuk unpublished data)
Apodiformes	Trochilidae	Chlorostilbon	ricordii		Chlorostilbon_ricordii	f	1	0.127	Vol		2.6	USNM553488	National Museum of Natural History				unknown	This study (Andrew Iwaniuk unpublished data)
Apodiformes	Trochilidae	Chlorostilbon	ricordii		Chlorostilbon_ricordii	m	1	0.122	Vol		2.8	USNM553485	National Museum of Natural History				unknown	This study (Andrew Iwaniuk unpublished data)
Apodiformes	Trochilidae	Chlorostilbon	ricordii		Chlorostilbon_ricordii	m	1	0.135	Vol		3	USNM553486	National Museum of Natural History				unknown	This study (Andrew Iwaniuk unpublished data)
Apodiformes	Trochilidae	Colibri	thalassinus		Colibri_thalassinus	m	1		Mass	0.19	5.48	HoBR216131	House of Bird Research collection		captivity		unknown	This study (Johannes Erritzøe House of Bird Research collection)
Apodiformes	Trochilidae	Eulampis	holosericeus		Eulampis_holosericeus	f	1	0.244	Vol		5.2	USNM555031	National Museum of Natural History				unknown	This study (Andrew Iwaniuk unpublished data)
Apodiformes	Trochilidae	Eulampis	holosericeus		Eulampis_holosericeus	f	1	0.244	Vol		5	USNM555033	National Museum of Natural History				unknown	This study (Andrew Iwaniuk unpublished data)
Apodiformes	Trochilidae	Eulampis	holosericeus		Eulampis_holosericeus	m	1	0.253	Vol		6	USNM556505	National Museum of Natural History				unknown	This study (Andrew Iwaniuk unpublished data)
Apodiformes	Trochilidae	Eulampis	holosericeus		Eulampis_holosericeus	m	1	0.217	Vol		6.4	USNM557655	National Museum of Natural History				unknown	This study (Andrew Iwaniuk unpublished data)
Apodiformes	Trochilidae	Eulampis	jugularis		Eulampis_jugularis	m	1	0.321	Vol		10.2	USNM556602	National Museum of Natural History				unknown	This study (Andrew Iwaniuk unpublished data)
Apodiformes	Trochilidae	Glaucis	hirsutus		Glaucis_hirsutus	f	1	0.247	Vol		7	USNM555682	National Museum of Natural History				unknown	This study (Andrew Iwaniuk unpublished data)
Apodiformes	Trochilidae	Glaucis	hirsutus		Glaucis_hirsutus	f	1	0.253	Vol		6.5	USNM555683	National Museum of Natural History				unknown	This study (Andrew Iwaniuk unpublished data)
Apodiformes	Trochilidae	Glaucis	hirsutus		Glaucis_hirsutus	m	1	0.261	Vol		7.5	USNM555680	National Museum of Natural History				unknown	This study (Andrew Iwaniuk unpublished data)
Apodiformes	Trochilidae	Glaucis	hirsutus		Glaucis_hirsutus	m	1	0.246	Vol		7.8	USNM560157	National Museum of Natural History				unknown	This study (Andrew Iwaniuk unpublished data)
Apodiformes	Trochilidae	Orthorhyncus	cristatus		Orthorhyncus_cristatus	f	1	0.143	Vol		2.4	USNM555021	National Museum of Natural History				unknown	This study (Andrew Iwaniuk unpublished data)
Apodiformes	Trochilidae	Orthorhyncus	cristatus		Orthorhyncus_cristatus	f	1	0.153	Vol		3	USNM612554	National Museum of Natural History				unknown	This study (Andrew Iwaniuk unpublished data)
Apodiformes	Trochilidae	Orthorhyncus	cristatus		Orthorhyncus_cristatus	m	1	0.131	Vol		2.8	USNM555011	National Museum of Natural History				unknown	This study (Andrew Iwaniuk unpublished data)
Apodiformes	Trochilidae	Orthorhyncus	cristatus		Orthorhyncus_cristatus	m	1	0.153	Vol		2.8	USNM555012	National Museum of Natural History				unknown	This study (Andrew Iwaniuk unpublished data)
Apodiformes	Trochilidae	Phaethornis	superciliosus		Phaethornis_superciliosus	f	1	0.26	Vol		7	USNM612308	National Museum of Natural History				unknown	This study (Andrew Iwaniuk unpublished data)
Apodiformes	Trochilidae	Phaethornis	superciliosus		Phaethornis_superciliosus	f	1	0.261	Vol		5.6	USNM613982	National Museum of Natural History				unknown	This study (Andrew Iwaniuk unpublished data)
Apodiformes	Trochilidae	Phaethornis	superciliosus		Phaethornis_superciliosus	m	1	0.247	Vol		5	USNM613381	National Museum of Natural History				unknown	This study (Andrew Iwaniuk unpublished data)
Apodiformes	Trochilidae	Phaethornis	superciliosus		Phaethornis_superciliosus	m	1	0.27	Vol		5.6	USNM613981	National Museum of Natural History				unknown	This study (Andrew Iwaniuk unpublished data)
Apodiformes	Trochilidae	Selasphorus	rufus		Selasphorus_rufus	m	1	0.152	Vol		3.2	USNM621311	National Museum of Natural History				unknown	This study (Andrew Iwaniuk unpublished data)
Apodiformes	Trochilidae	Thalurania	furcata		Thalurania_furcata	m	1	0.179	Vol		4.1	USNM562451	National Museum of Natural History				unknown	This study (Andrew Iwaniuk unpublished data)
Apodiformes	Trochilidae	Threnetes	ruckeri		Threnetes_ruckeri	f	1	0.282	Vol		6.2	USNM611582	National Museum of Natural History				unknown	This study (Andrew Iwaniuk unpublished data)
Apodiformes	Trochilidae	Threnetes	ruckeri		Threnetes_ruckeri	f	1	0.28	Vol		5.6	USNM612314	National Museum of Natural History				unknown	This study (Andrew Iwaniuk unpublished data)
Apodiformes	Trochilidae	Threnetes	ruckeri		Threnetes_ruckeri	m	1	0.254	Vol		6.4	USNM611585	National Museum of Natural History				unknown	This study (Andrew Iwaniuk unpublished data)
Apodiformes	Trochilidae	Threnetes	ruckeri		Threnetes_ruckeri	m	1	0.253	Vol		5.3	USNM613371	National Museum of Natural History				unknown	This study (Andrew Iwaniuk unpublished data)
Apodiformes	Trochilidae	Trochilus	polytmus		Trochilus_polytmus	f	1	0.189	Vol		4.4	USNM502805	National Museum of Natural History				unknown	This study (Andrew Iwaniuk unpublished data)
Apodiformes	Trochilidae	Trochilus	polytmus		Trochilus_polytmus	f	1	0.177	Vol		3.5	USNM558872	National Museum of Natural History				unknown	This study (Andrew Iwaniuk unpublished data)
Apodiformes	Trochilidae	Trochilus	polytmus		Trochilus_polytmus	m	1	0.198	Vol		4.5	USNM558879	National Museum of Natural History				unknown	This study (Andrew Iwaniuk unpublished data)
Apodiformes	Trochilidae	Trochilus	polytmus		Trochilus_polytmus	m	1	0.204	Vol		4.8	USNM558880	National Museum of Natural History				unknown	This study (Andrew Iwaniuk unpublished data)
Bucerotiformes	Bucerotidae	Buceros	hydrocorax		Buceros_hydrocorax	f	1	17	Vol		1400	USNM613076	National Museum of Natural History				unknown	This study (Andrew Iwaniuk unpublished data)
Bucerotiformes	Bucerotidae	Bucorvus	cafer		Bucorvus_cafer	m	1		Mass	26.25	2150	CQ163			Maji Moto Camp, Kenya		unknown	Crile G and Quiring DP (1940) Ohio J Sci 40:219-259.
Bucerotiformes	Bucerotidae	Bucorvus	cafer		Bucorvus_cafer	m	1		Mass	31.6	2670	HoBR Not registered	House of Bird Research collection				Adult	This study (Johannes Erritzøe House of Bird Research collection)
Bucerotiformes	Bucerotidae	Penelopides	panini		Penelopides_panini	m	1	7.35	Vol		420	USNM613075	National Museum of Natural History				unknown	This study (Andrew Iwaniuk unpublished data)
Bucerotiformes	Bucerotidae	Tockus	erythrorhynchus	kempi	Tockus_erythrorhynchus	f	1		Mass	3.32	143.2	HoBR Not registered	House of Bird Research collection		captivity		unknown	This study (Johannes Erritzøe House of Bird Research collection)
Bucerotiformes	Bucerotidae	Tockus	erythrorhynchus		Tockus_erythrorhynchus	f	1	3.65	Vol		140	USNM558555	National Museum of Natural History				unknown	This study (Andrew Iwaniuk unpublished data)
Bucerotiformes	Bucerotidae	Tockus	erythrorhynchus		Tockus_erythrorhynchus	m	1		Mass	3.1	128.7	HoBR Not registered	House of Bird Research collection	3-12-1974	Mandinari-Arca, Gambia		Adult	This study (Johannes Erritzøe House of Bird Research collection)
Bucerotiformes	Bucerotidae	Tockus	flavirostris		Tockus_flavirostris	f	1	4	Vol		220	USNM558557	National Museum of Natural History				unknown	This study (Andrew Iwaniuk unpublished data)
Bucerotiformes	Bucerotidae	Tockus	flavirostris		Tockus_flavirostris	m	1	4.75	Vol		256	USNM558556	National Museum of Natural History				unknown	This study (Andrew Iwaniuk unpublished data)
Bucerotiformes	Bucerotidae	Tockus	flavirostris		Tockus_flavirostris	m	1	4.8	Vol		255	USNM558558	National Museum of Natural History				unknown	This study (Andrew Iwaniuk unpublished data)
Bucerotiformes	Phoeniculidae	Phoeniculus	purpureus		Phoeniculus_purpureus	f	1	2.05	Vol		780	USNM559060	National Museum of Natural History				unknown	This study (Andrew Iwaniuk unpublished data)
Bucerotiformes	Upupidae	Upupa	epops		Upupa_epops	f	1		Mass	1.37	34.5	HoBR216101	House of Bird Research collection	1-20-1989	India		Adult	This study (Johannes Erritzøe House of Bird Research collection)
Bucerotiformes	Upupidae	Upupa	epops		Upupa_epops	m	1		Mass	1.23	41.3	HoBR216102	House of Bird Research collection	1-20-1989	India		Adult	This study (Johannes Erritzøe House of Bird Research collection)
Bucerotiformes	Upupidae	Upupa	epops		Upupa_epops	m	1		Mass	1.33	43.25	HoBR216104	House of Bird Research collection	1-20-1989	India		unknown	This study (Johannes Erritzøe House of Bird Research collection)
Bucerotiformes	Upupidae	Upupa	epops		Upupa_epops	m	1		Mass	1.13	36.3	HoBR216105	House of Bird Research collection		India		Adult	This study (Johannes Erritzøe House of Bird Research collection)
Caprimulgiformes	Aegothelidae	Aegotheles	cristatus		Aegotheles_cristatus	f	1	1.5	Vol		40	MV B16318	Museum Victoria				unknown	This study (Andrew Iwaniuk unpublished data)
Caprimulgiformes	Aegothelidae	Aegotheles	cristatus		Aegotheles_cristatus	f	1	1.45	Vol		45.1	MV B17529	Museum Victoria				unknown	This study (Andrew Iwaniuk unpublished data)
Caprimulgiformes	Aegothelidae	Aegotheles	cristatus		Aegotheles_cristatus	m	1	1.35	Vol		42	ANWC23996	Australian National Wildlife Collection				unknown	This study (Andrew Iwaniuk unpublished data)
Caprimulgiformes	Aegothelidae	Aegotheles	cristatus		Aegotheles_cristatus	m	1	1.4	Vol		30	MV B19829	Museum Victoria				unknown	This study (Andrew Iwaniuk unpublished data)
Caprimulgiformes	Aegothelidae	Aegotheles	cristatus		Aegotheles_cristatus	m	1	1.3	Vol		40	MV B19833	Museum Victoria				unknown	This study (Andrew Iwaniuk unpublished data)
Caprimulgiformes	Aegothelidae	Aegotheles	cristatus		Aegotheles_cristatus	m	1	1.5	Vol		45.3	MV B20335	Museum Victoria				unknown	This study (Andrew Iwaniuk unpublished data)
Caprimulgiformes	Aegothelidae	Aeronautes	saxatalis		Aeronautes_saxatalis	f	1	0.74	Vol		35	USNM612548	National Museum of Natural History				unknown	This study (Andrew Iwaniuk unpublished data)
Caprimulgiformes	Aegothelidae	Aeronautes	saxatalis		Aeronautes_saxatalis	f	1	0.67	Vol		36	USNM612549	National Museum of Natural History				unknown	This study (Andrew Iwaniuk unpublished data)
Caprimulgiformes	Aegothelidae	Aeronautes	saxatalis		Aeronautes_saxatalis	m	1	0.65	Vol		37.4	USNM621129	National Museum of Natural History				unknown	This study (Andrew Iwaniuk unpublished data)
Caprimulgiformes	Aegothelidae	Aeronautes	saxatalis		Aeronautes_saxatalis	m	1	0.69	Vol		39.6	USNM621130	National Museum of Natural History				unknown	This study (Andrew Iwaniuk unpublished data)
Caprimulgiformes	Caprimulgidae	Caprimulgus	carolinensis		Caprimulgus_carolinensis	f	1	1.3	Vol		94.3	USNM500681	National Museum of Natural History				unknown	This study (Andrew Iwaniuk unpublished data)
Caprimulgiformes	Caprimulgidae	Caprimulgus	carolinensis		Caprimulgus_carolinensis	f	1	1.3	Vol		93.5	USNM500682	National Museum of Natural History				unknown	This study (Andrew Iwaniuk unpublished data)
Caprimulgiformes	Caprimulgidae	Caprimulgus	carolinensis		Caprimulgus_carolinensis	m	1	1.4	Vol		125	USNM562546	National Museum of Natural History				unknown	This study (Andrew Iwaniuk unpublished data)
Caprimulgiformes	Caprimulgidae	Caprimulgus	europaeus	europaeus	Caprimulgus_europaeus	m	1		Mass	0.7	83.3	HoBR216049	House of Bird Research collection	5-9-1988	near Viskinge, Kalundborg, DK, 2	55.41N 11.06E	Adult	This study (Johannes Erritzøe House of Bird Research collection)
Caprimulgiformes	Caprimulgidae	Caprimulgus	europaeus		Caprimulgus_europaeus	f	1	0.89	Vol		61.4	USNM603610	National Museum of Natural History				unknown	This study (Andrew Iwaniuk unpublished data)
Caprimulgiformes	Caprimulgidae	Caprimulgus	macrurus		Caprimulgus_macrurus	f	1	1.35	Vol		67	AMO59890	Australian Museum				unknown	This study (Andrew Iwaniuk unpublished data)
Caprimulgiformes	Caprimulgidae	Caprimulgus	macrurus		Caprimulgus_macrurus	f	1	1.07	Vol		84.6	USNM620406	National Museum of Natural History				unknown	This study (Andrew Iwaniuk unpublished data)
Caprimulgiformes	Caprimulgidae	Caprimulgus	vociferus		Caprimulgus_vociferus	f	1	0.81	Vol		42	USNM502467	National Museum of Natural History				unknown	This study (Andrew Iwaniuk unpublished data)
Caprimulgiformes	Caprimulgidae	Caprimulgus	vociferus		Caprimulgus_vociferus	m	1	0.78	Vol		59.5	USNM501941	National Museum of Natural History				unknown	This study (Andrew Iwaniuk unpublished data)
Caprimulgiformes	Caprimulgidae	Chordeiles	minor		Chordeiles_minor	f	1	0.86	Vol		61	USNM614378	National Museum of Natural History				unknown	This study (Andrew Iwaniuk unpublished data)
Caprimulgiformes	Caprimulgidae	Chordeiles	minor		Chordeiles_minor	m	1	0.84	Vol		53.2	USNM614374	National Museum of Natural History				unknown	This study (Andrew Iwaniuk unpublished data)
Caprimulgiformes	Caprimulgidae	Eurostopodus	argus		Eurostopodus_argus	f	1	0.98	Vol		72	ANWC28693	Australian National Wildlife Collection				unknown	This study (Andrew Iwaniuk unpublished data)
Caprimulgiformes	Caprimulgidae	Eurostopodus	macrotis		Eurostopodus_macrotis	f	1	1.2	Vol		170	USNM560872	National Museum of Natural History				unknown	This study (Andrew Iwaniuk unpublished data)
Caprimulgiformes	Caprimulgidae	Eurostopodus	macrotis		Eurostopodus_macrotis	f	1	1.5	Vol		145	USNM613058	National Museum of Natural History				unknown	This study (Andrew Iwaniuk unpublished data)
Caprimulgiformes	Caprimulgidae	Eurostopodus	macrotis		Eurostopodus_macrotis	m	1	1.55	Vol		180	USNM560871	National Museum of Natural History				unknown	This study (Andrew Iwaniuk unpublished data)
Caprimulgiformes	Caprimulgidae	Eurostopodus	mystacalis		Eurostopodus_mystacalis	f	1	1.25	Vol		170	ANWC47405	Australian National Wildlife Collection				unknown	This study (Andrew Iwaniuk unpublished data)
Caprimulgiformes	Caprimulgidae	Macrodipteryx	vexillarius		Macrodipteryx_vexillarius	m	1	0.81	Vol		64	USNM489453	National Museum of Natural History				unknown	This study (Andrew Iwaniuk unpublished data)
Caprimulgiformes	Caprimulgidae	Macrodipteryx	vexillarius		Macrodipteryx_vexillarius	m	1	0.91	Vol		65.5	USNM489459	National Museum of Natural History				unknown	This study (Andrew Iwaniuk unpublished data)
Caprimulgiformes	Caprimulgidae	Macrodipteryx	vexillarius		Macrodipteryx_vexillarius	m	1	0.81	Vol		68.9	USNM489471	National Museum of Natural History				unknown	This study (Andrew Iwaniuk unpublished data)
Caprimulgiformes	Caprimulgidae	Nyctidromus	albicollis		Nyctidromus_albicollis	f	1	0.91	Vol		53.5	USNM612302	National Museum of Natural History				unknown	This study (Andrew Iwaniuk unpublished data)
Caprimulgiformes	Caprimulgidae	Nyctidromus	albicollis		Nyctidromus_albicollis	m	1	0.91	Vol		72.7	USNM554345	National Museum of Natural History				unknown	This study (Andrew Iwaniuk unpublished data)
Caprimulgiformes	Caprimulgidae	Nyctidromus	albicollis		Nyctidromus_albicollis	m	1	0.84	Vol		49	USNM562196	National Museum of Natural History				unknown	This study (Andrew Iwaniuk unpublished data)
Caprimulgiformes	Caprimulgidae	Nyctidromus	albicollis		Nyctidromus_albicollis	m	1	0.89	Vol		53	USNM562198	National Museum of Natural History				unknown	This study (Andrew Iwaniuk unpublished data)
Caprimulgiformes	Caprimulgidae	Nyctidromus	albicollis		Nyctidromus_albicollis	m	1	0.95	Vol		64	USNM612300	National Museum of Natural History				unknown	This study (Andrew Iwaniuk unpublished data)
Caprimulgiformes	Caprimulgidae	Nyctiphrynus	ocellatus		Nyctiphrynus_ocellatus	f	1	0.7	Vol		39	USNM562200	National Museum of Natural History				unknown	This study (Andrew Iwaniuk unpublished data)
Caprimulgiformes	Caprimulgidae	Nyctiprogne	leucopyga		Nyctiprogne_leucopyga	m	1	0.46	Vol		23	USNM562194	National Museum of Natural History				unknown	This study (Andrew Iwaniuk unpublished data)
Caprimulgiformes	Caprimulgidae	Podager	nacunda		Podager_nacunda	m	1	1.35	Vol		210	USNM614646	National Museum of Natural History				unknown	This study (Andrew Iwaniuk unpublished data)
Caprimulgiformes	Caprimulgidae	Podager	nacunda		Podager_nacunda	m	1	1.45	Vol		213	USNM614647	National Museum of Natural History				unknown	This study (Andrew Iwaniuk unpublished data)
Caprimulgiformes	Nyctibiidae	Nyctibius	griseus		Nyctibius_griseus	m	1	1.95	Vol		186	USNM555945	National Museum of Natural History				unknown	This study (Andrew Iwaniuk unpublished data)
Caprimulgiformes	Nyctibiidae	Nyctibius	griseus		Nyctibius_griseus	m	1	1.95	Vol		282	USNM610497	National Museum of Natural History				unknown	This study (Andrew Iwaniuk unpublished data)
Caprimulgiformes	Nyctibiidae	Nyctibius	griseus		Nyctibius_griseus	m	1	2	Vol		304.3	USNM611774	National Museum of Natural History				unknown	This study (Andrew Iwaniuk unpublished data)
Cathartiformes	Cathartidae	Cathartes	aura	septentrionalis	Cathartes_aura	m	1		Mass	9.3	494	CQ24F			Key West, Florida, USA		unknown	Crile G and Quiring DP (1940) Ohio J Sci 40:219-259.
Cathartiformes	Cathartidae	Cathartes	aura		Cathartes_aura	f	1		Mass	11.6	2381.4						Adult	Hrdlicka A (1905) Brain Weight in Vertebrates
Cathartiformes	Cathartidae	Cathartes	aura		Cathartes_aura	m	1	8.8	Vol		1300	USNM562524	National Museum of Natural History				unknown	This study (Andrew Iwaniuk unpublished data)
Cathartiformes	Cathartidae	Cathartes	aura		Cathartes_aura	m	1	9.4	Vol		1460	USNM621368	National Museum of Natural History				unknown	This study (Andrew Iwaniuk unpublished data)
Cathartiformes	Cathartidae	Cathartes	aura		Cathartes_aura	unknown	1		Mass	9.85	1530						Adult	Hrdlicka A (1905) Brain Weight in Vertebrates
Cathartiformes	Cathartidae	Cathartes	aura		Cathartes_aura	unknown	1		Mass	10.8	2065						Adult	Hrdlicka A (1905) Brain Weight in Vertebrates
Cathartiformes	Cathartidae	Coragyps	atratus		Coragyps_atratus	f	1	12	Vol		1875	USNM613353	National Museum of Natural History				unknown	This study (Andrew Iwaniuk unpublished data)
Cathartiformes	Cathartidae	Coragyps	atratus		Coragyps_atratus	m	1	10.75	Vol		1700	USNM613352	National Museum of Natural History				unknown	This study (Andrew Iwaniuk unpublished data)
Charadriiformes	Alcidae	Aethia	cristatella		Aethia_cristatella	f	1	2.5	Vol		306.5	USNM498282	National Museum of Natural History				unknown	This study (Andrew Iwaniuk unpublished data)
Charadriiformes	Alcidae	Aethia	cristatella		Aethia_cristatella	f	1	2.4	Vol		340	USNM561932	National Museum of Natural History				Subadult	This study (Andrew Iwaniuk unpublished data)
Charadriiformes	Alcidae	Aethia	cristatella		Aethia_cristatella	f	1	2.4	Vol		240	USNM561934	National Museum of Natural History				Adult	This study (Andrew Iwaniuk unpublished data)
Charadriiformes	Alcidae	Aethia	cristatella		Aethia_cristatella	f	1	2.4	Vol		250	USNM561935	National Museum of Natural History				Adult	This study (Andrew Iwaniuk unpublished data)
Charadriiformes	Alcidae	Aethia	cristatella		Aethia_cristatella	m	1	2.7	Vol		285	USNM561931	National Museum of Natural History				Subadult	This study (Andrew Iwaniuk unpublished data)
Charadriiformes	Alcidae	Aethia	cristatella		Aethia_cristatella	m	1	2.65	Vol		255	USNM561933	National Museum of Natural History				Subadult	This study (Andrew Iwaniuk unpublished data)
Charadriiformes	Alcidae	Aethia	psittacula		Camarhynchus_psittacula	m	1	2.5	Vol		188	USNM561930	National Museum of Natural History				Adult	This study (Andrew Iwaniuk unpublished data)
Charadriiformes	Alcidae	Aethia	pusilla		Aethia_pusilla	f	1	1.5	Vol		88	USNM498283	National Museum of Natural History				unknown	This study (Andrew Iwaniuk unpublished data)
Charadriiformes	Alcidae	Aethia	pusilla		Aethia_pusilla	f	1	1.4	Vol		75.4	USNM498287	National Museum of Natural History				unknown	This study (Andrew Iwaniuk unpublished data)
Charadriiformes	Alcidae	Aethia	pusilla		Aethia_pusilla	f	1	1.45	Vol		77	USNM498288	National Museum of Natural History				unknown	This study (Andrew Iwaniuk unpublished data)
Charadriiformes	Alcidae	Aethia	pusilla		Aethia_pusilla	m	1	1.55	Vol		86.5	USNM498293	National Museum of Natural History				unknown	This study (Andrew Iwaniuk unpublished data)
Charadriiformes	Alcidae	Aethia	pusilla		Aethia_pusilla	m	1	1.4	Vol		81.3	USNM498294	National Museum of Natural History				unknown	This study (Andrew Iwaniuk unpublished data)
Charadriiformes	Alcidae	Aethia	pusilla		Aethia_pusilla	m	1	1.5	Vol		72.5	USNM498295	National Museum of Natural History				unknown	This study (Andrew Iwaniuk unpublished data)
Charadriiformes	Alcidae	Aethia	pusilla		Aethia_pusilla	m	1	1.45	Vol		80	USNM498921	National Museum of Natural History				unknown	This study (Andrew Iwaniuk unpublished data)
Charadriiformes	Alcidae	Aethia	pusilla		Aethia_pusilla	m	1		Mass	1.107	83.17	HoBR365603	House of Bird Research collection	6-0-2011	St. Plau Is., Alaska	57.15N 170.23W	Adult	This study (Johannes Erritzøe House of Bird Research collection)
Charadriiformes	Alcidae	Alca	torda		Alca_torda	f	1		Mass	5.15	832.6	HoBR235558	House of Bird Research collection	1-10-1991	Ærø, DK	08.28N 10.20E	Adult	This study (Johannes Erritzøe House of Bird Research collection)
Charadriiformes	Alcidae	Alca	torda		Alca_torda	f	1		Mass	4.853	508	HoBR308939	House of Bird Research collection	3-10-2005	Kandestederne,DK	57.40N 10.24E	Adult	This study (Johannes Erritzøe House of Bird Research collection)
Charadriiformes	Alcidae	Alca	torda		Alca_torda	unknown	1		Mass	4.85	833.2	HoBR167060	House of Bird Research collection		Lillebælt, DK	55.09N 09.48E	unknown	This study (Johannes Erritzøe House of Bird Research collection)
Charadriiformes	Alcidae	Alle	alle	alle	Alle_alle	f	1		Mass	2.3	96	HoBR235777	House of Bird Research collection	1-20-1990	Ribe, DK	55.20N 08.46E	Adult	This study (Johannes Erritzøe House of Bird Research collection)
Charadriiformes	Alcidae	Alle	alle	alle	Alle_alle	f	1		Mass	1.733	97.52	HoBR337667	House of Bird Research collection	11-11-2006	Blokhus, DK	57.15N 09.35E	Adult	This study (Johannes Erritzøe House of Bird Research collection)
Charadriiformes	Alcidae	Alle	alle	alle	Alle_alle	f	1		Mass	1.67	143.8	HoBR235082	House of Bird Research collection	6-22-1988	Greenland		Adult	This study (Johannes Erritzøe House of Bird Research collection)
Charadriiformes	Alcidae	Alle	alle	alle	Alle_alle	f	1		Mass	1.65	143.8	HoBR235085	House of Bird Research collection				Adult	This study (Johannes Erritzøe House of Bird Research collection)
Charadriiformes	Alcidae	Alle	alle	alle	Alle_alle	f	1		Mass	1.8	159.4	HoBR235110	House of Bird Research collection		Greenland		Adult	This study (Johannes Erritzøe House of Bird Research collection)
Charadriiformes	Alcidae	Alle	alle	alle	Alle_alle	m	1		Mass	2.118	104.87	HoBR314543	House of Bird Research collection		Ribe, DK	55.20N 08.46E	unknown	This study (Johannes Erritzøe House of Bird Research collection)
Charadriiformes	Alcidae	Alle	alle	alle	Alle_alle	m	1		Mass	2.118	104.87	HoBR314543	House of Bird Research collection	2001	Ribe, DK	55.20N 08.46E	unknown	This study (Johannes Erritzøe House of Bird Research collection)
Charadriiformes	Alcidae	Alle	alle	alle	Alle_alle	m	1		Mass	2.091	109.14	HoBR338481	House of Bird Research collection	12-2-2007	Vamdrup, DK	55.25N 09.17E	unknown	This study (Johannes Erritzøe House of Bird Research collection)
Charadriiformes	Alcidae	Alle	alle	alle	Alle_alle	m	1		Mass	1.939	110.39	HoBR Not registered	House of Bird Research collection	11-19-1993	Blokhus, DK	57.16N 09.36E	unknown	This study (Johannes Erritzøe House of Bird Research collection)
Charadriiformes	Alcidae	Alle	alle	alle	Alle_alle	m	1		Mass	1.88	151	HoBR235086	House of Bird Research collection				Adult	This study (Johannes Erritzøe House of Bird Research collection)
Charadriiformes	Alcidae	Alle	alle	alle	Alle_alle	m	1		Mass	1.93	167.6	HoBR235111	House of Bird Research collection		Greenland		Adult	This study (Johannes Erritzøe House of Bird Research collection)
Charadriiformes	Alcidae	Alle	alle		Alle_alle	f	1		Mass	1.93	102	CQ50F			Key West, Florida, USA		unknown	Crile G and Quiring DP (1940) Ohio J Sci 40:219-259.
Charadriiformes	Alcidae	Alle	alle		Alle_alle	f	1	1.95	Vol		152.7	USNM560926	National Museum of Natural History				Adult	This study (Andrew Iwaniuk unpublished data)
Charadriiformes	Alcidae	Alle	alle		Alle_alle	f	1	2	Vol		141.5	USNM560930	National Museum of Natural History				Adult	This study (Andrew Iwaniuk unpublished data)
Charadriiformes	Alcidae	Alle	alle		Alle_alle	f	1	2.2	Vol		164.7	USNM560931	National Museum of Natural History				Adult	This study (Andrew Iwaniuk unpublished data)
Charadriiformes	Alcidae	Alle	alle		Alle_alle	m	1		Mass	1.92	104	CQ51F			Key West, Florida, USA		unknown	Crile G and Quiring DP (1940) Ohio J Sci 40:219-259.
Charadriiformes	Alcidae	Alle	alle		Alle_alle	m	1	2.15	Vol		181.6	USNM560933	National Museum of Natural History				Adult	This study (Andrew Iwaniuk unpublished data)
Charadriiformes	Alcidae	Brachyramphus	marmoratus		Brachyramphus_marmoratus	f	1	2.35	Vol		243.6	USNM557616	National Museum of Natural History				unknown	This study (Andrew Iwaniuk unpublished data)
Charadriiformes	Alcidae	Brachyramphus	marmoratus		Brachyramphus_marmoratus	f	1	2.3	Vol		244.4	USNM557617	National Museum of Natural History				unknown	This study (Andrew Iwaniuk unpublished data)
Charadriiformes	Alcidae	Brachyramphus	marmoratus		Brachyramphus_marmoratus	f	1	2.3	Vol		266.3	USNM557622	National Museum of Natural History				unknown	This study (Andrew Iwaniuk unpublished data)
Charadriiformes	Alcidae	Brachyramphus	marmoratus		Brachyramphus_marmoratus	f	1	2.55	Vol		184.2	USNM599498	National Museum of Natural History				unknown	This study (Andrew Iwaniuk unpublished data)
Charadriiformes	Alcidae	Brachyramphus	marmoratus		Brachyramphus_marmoratus	f	1		Mass	2.117	195	HoBR365353	House of Bird Research collection	8-21-1996			unknown	This study (Johannes Erritzøe House of Bird Research collection)
Charadriiformes	Alcidae	Brachyramphus	marmoratus		Brachyramphus_marmoratus	f	1		Mass	2.333	228.6	HoBR365308	House of Bird Research collection	7-2-2011			Adult	This study (Johannes Erritzøe House of Bird Research collection)
Charadriiformes	Alcidae	Brachyramphus	marmoratus		Brachyramphus_marmoratus	m	1	2.3	Vol		236	USNM557618	National Museum of Natural History				unknown	This study (Andrew Iwaniuk unpublished data)
Charadriiformes	Alcidae	Brachyramphus	marmoratus		Brachyramphus_marmoratus	m	1	2.35	Vol		227	USNM557620	National Museum of Natural History				unknown	This study (Andrew Iwaniuk unpublished data)
Charadriiformes	Alcidae	Brachyramphus	marmoratus		Brachyramphus_marmoratus	m	1	2.35	Vol		233.2	USNM557621	National Museum of Natural History				unknown	This study (Andrew Iwaniuk unpublished data)
Charadriiformes	Alcidae	Brachyramphus	marmoratus		Brachyramphus_marmoratus	m	1	2.3	Vol		232.3	USNM612990	National Museum of Natural History				unknown	This study (Andrew Iwaniuk unpublished data)
Charadriiformes	Alcidae	Brachyramphus	marmoratus		Brachyramphus_marmoratus	m	1		Mass	2.29	182.18	HoBR365297	House of Bird Research collection	7-16-2013	between Spire and Bold Is.	55.27N 131.48W	unknown	This study (Johannes Erritzøe House of Bird Research collection)
Charadriiformes	Alcidae	Cepphus	columba		Cepphus_columba	f	1	3.8	Vol		607	USNM498420	National Museum of Natural History				Adult	This study (Andrew Iwaniuk unpublished data)
Charadriiformes	Alcidae	Cepphus	columba		Cepphus_columba	f	1	3.9	Vol		516	USNM498422	National Museum of Natural History				unknown	This study (Andrew Iwaniuk unpublished data)
Charadriiformes	Alcidae	Cepphus	columba		Cepphus_columba	f	1	3.7	Vol		515	USNM612988	National Museum of Natural History				unknown	This study (Andrew Iwaniuk unpublished data)
Charadriiformes	Alcidae	Cepphus	columba		Cepphus_columba	f	1		Mass	3.339	347.501	HoBR365597	House of Bird Research collection	7-27-2007	Kodiak I. Alaska	57.46N 152.30W	unknown	This study (Johannes Erritzøe House of Bird Research collection)
Charadriiformes	Alcidae	Cepphus	columba		Cepphus_columba	m	1	3.9	Vol		581	USNM498423	National Museum of Natural History				unknown	This study (Andrew Iwaniuk unpublished data)
Charadriiformes	Alcidae	Cepphus	columba		Cepphus_columba	m	1	4	Vol		555	USNM612989	National Museum of Natural History				unknown	This study (Andrew Iwaniuk unpublished data)
Charadriiformes	Alcidae	Cepphus	grylle		Cepphus_grylle	f	1	3	Vol		358.3	PMA 84.54.12	Royal Alberta Museum				unknown	This study (Andrew Iwaniuk unpublished data)
Charadriiformes	Alcidae	Cepphus	grylle		Cepphus_grylle	f	1		Mass	2.733	431.557	HoBR286668	House of Bird Research collection	3-11-1999	Ålbæk Bugten, DK	57.36N 10.35E	Adult	This study (Johannes Erritzøe House of Bird Research collection)
Charadriiformes	Alcidae	Cepphus	grylle		Cepphus_grylle	f	1		Mass	3.207	379.429	HoBR189555	House of Bird Research collection	4-xx-1985	Nuuk, Greenland	64.11N 51.45W	Adult	This study (Johannes Erritzøe House of Bird Research collection)
Charadriiformes	Alcidae	Cepphus	grylle		Cepphus_grylle	f	1		Mass	3.373	457.779	HoBR189557	House of Bird Research collection	4-xx-1985	Nuuk, Greenland	64.11N 51.45W	Adult	This study (Johannes Erritzøe House of Bird Research collection)
Charadriiformes	Alcidae	Cepphus	grylle		Cepphus_grylle	m	1	2.6	Vol		447	PMA 83.46.4	Royal Alberta Museum				unknown	This study (Andrew Iwaniuk unpublished data)
Charadriiformes	Alcidae	Cepphus	grylle		Cepphus_grylle	m	1	2.5	Vol		344.7	PMA 84.54.11	Royal Alberta Museum				unknown	This study (Andrew Iwaniuk unpublished data)
Charadriiformes	Alcidae	Cepphus	grylle		Cepphus_grylle	m	1		Mass	3.243	419.493	HoBR189553	House of Bird Research collection	3-xx-1985	Nuuk, Greenland	64.11N 51.45W	Adult	This study (Johannes Erritzøe House of Bird Research collection)
Charadriiformes	Alcidae	Cerorhinca	monocerata		Cerorhinca_monocerata	f	1	4.6	Vol		548.1	USNM557614	National Museum of Natural History				unknown	This study (Andrew Iwaniuk unpublished data)
Charadriiformes	Alcidae	Cerorhinca	monocerata		Cerorhinca_monocerata	f	1		Mass	4.442	520	HoBR365598	House of Bird Research collection	8-31-2009	Aiktak I., Aleutians, Alaska	54.18N 164.83W	Adult	This study (Johannes Erritzøe House of Bird Research collection)
Charadriiformes	Alcidae	Cerorhinca	monocerata		Cerorhinca_monocerata	f	1		Mass	4.326	550	HoBR365595	House of Bird Research collection	8-26-2003	off Baker Island, Alaska	55.38N 133.58W	Adult	This study (Johannes Erritzøe House of Bird Research collection)
Charadriiformes	Alcidae	Cerorhinca	monocerata		Cerorhinca_monocerata	m	1	4.7	Vol		572.6	USNM557613	National Museum of Natural History				unknown	This study (Andrew Iwaniuk unpublished data)
Charadriiformes	Alcidae	Fratercula	arctica		Fratercula_arctica	f	1	4	Vol		478	PMA 86.16.12	Royal Alberta Museum				unknown	This study (Andrew Iwaniuk unpublished data)
Charadriiformes	Alcidae	Fratercula	arctica		Fratercula_arctica	f	1	3.9	Vol		461	PMA 86.16.13	Royal Alberta Museum				unknown	This study (Andrew Iwaniuk unpublished data)
Charadriiformes	Alcidae	Fratercula	arctica		Fratercula_arctica	f	1	3.7	Vol		431	PMA 86.16.16	Royal Alberta Museum				unknown	This study (Andrew Iwaniuk unpublished data)
Charadriiformes	Alcidae	Fratercula	arctica		Fratercula_arctica	f	1	3.9	Vol		450	PMA 86.16.17	Royal Alberta Museum				unknown	This study (Andrew Iwaniuk unpublished data)
Charadriiformes	Alcidae	Fratercula	arctica		Fratercula_arctica	f	1	4	Vol		465	PMA 86.16.18	Royal Alberta Museum				unknown	This study (Andrew Iwaniuk unpublished data)
Charadriiformes	Alcidae	Fratercula	arctica		Fratercula_arctica	f	1		Mass	4.2	318.5	HoBR171961	House of Bird Research collection	2-11-1992			Adult	This study (Johannes Erritzøe House of Bird Research collection)
Charadriiformes	Alcidae	Fratercula	arctica		Fratercula_arctica	m	1	4	Vol		508	PMA 86.16.19	Royal Alberta Museum				unknown	This study (Andrew Iwaniuk unpublished data)
Charadriiformes	Alcidae	Fratercula	arctica		Fratercula_arctica	m	1	4.5	Vol		552	PMA 86.16.5	Royal Alberta Museum				unknown	This study (Andrew Iwaniuk unpublished data)
Charadriiformes	Alcidae	Fratercula	arctica		Fratercula_arctica	m	1	4.1	Vol		470	PMA 86.16.9	Royal Alberta Museum				unknown	This study (Andrew Iwaniuk unpublished data)
Charadriiformes	Alcidae	Fratercula	arctica		Fratercula_arctica	m	1		Mass	3.9	385.5	HoBR213878	House of Bird Research collection				Adult	This study (Johannes Erritzøe House of Bird Research collection)
Charadriiformes	Alcidae	Fratercula	arctica		Fratercula_arctica	m	1		Mass	3.55	382.5	HoBR257788	House of Bird Research collection		The Faroe Islands		Adult	This study (Johannes Erritzøe House of Bird Research collection)
Charadriiformes	Alcidae	Fratercula	cirrhata		Fratercula_cirrhata	f	1	5.8	Vol		910	USNM558358	National Museum of Natural History				Adult	This study (Andrew Iwaniuk unpublished data)
Charadriiformes	Alcidae	Fratercula	cirrhata		Fratercula_cirrhata	f	1	5.8	Vol		1052	USNM561942	National Museum of Natural History				Adult	This study (Andrew Iwaniuk unpublished data)
Charadriiformes	Alcidae	Fratercula	cirrhata		Fratercula_cirrhata	m	1	5.7	Vol		895	USNM556445	National Museum of Natural History				unknown	This study (Andrew Iwaniuk unpublished data)
Charadriiformes	Alcidae	Fratercula	cirrhata		Fratercula_cirrhata	m	1	6.1	Vol		900	USNM556448	National Museum of Natural History				Adult	This study (Andrew Iwaniuk unpublished data)
Charadriiformes	Alcidae	Fratercula	cirrhata		Fratercula_cirrhata	m	1	6	Vol		875	USNM556454	National Museum of Natural History				unknown	This study (Andrew Iwaniuk unpublished data)
Charadriiformes	Alcidae	Fratercula	cirrhata		Fratercula_cirrhata	m	1	5.9	Vol		860	USNM556456	National Museum of Natural History				unknown	This study (Andrew Iwaniuk unpublished data)
Charadriiformes	Alcidae	Fratercula	cirrhata		Fratercula_cirrhata	m	1	6.4	Vol		1010	USNM561944	National Museum of Natural History				Adult	This study (Andrew Iwaniuk unpublished data)
Charadriiformes	Alcidae	Fratercula	corniculata		Fratercula_corniculata	f	1	5.1	Vol		481	USNM499961	National Museum of Natural History				unknown	This study (Andrew Iwaniuk unpublished data)
Charadriiformes	Alcidae	Fratercula	corniculata		Fratercula_corniculata	f	1	5.15	Vol		740	USNM561939	National Museum of Natural History				unknown	This study (Andrew Iwaniuk unpublished data)
Charadriiformes	Alcidae	Fratercula	corniculata		Fratercula_corniculata	m	1	4.9	Vol		675	USNM556451	National Museum of Natural History				unknown	This study (Andrew Iwaniuk unpublished data)
Charadriiformes	Alcidae	Fratercula	corniculata		Fratercula_corniculata	m	1	4.9	Vol		690	USNM556452	National Museum of Natural History				unknown	This study (Andrew Iwaniuk unpublished data)
Charadriiformes	Alcidae	Fratercula	corniculata		Fratercula_corniculata	m	1	4.9	Vol		650	USNM556453	National Museum of Natural History				unknown	This study (Andrew Iwaniuk unpublished data)
Charadriiformes	Alcidae	Ptychoramphus	aleuticus		Ptychoramphus_aleuticus	f	1	1.8	Vol		151.3	USNM557607	National Museum of Natural History				unknown	This study (Andrew Iwaniuk unpublished data)
Charadriiformes	Alcidae	Ptychoramphus	aleuticus		Ptychoramphus_aleuticus	f	1	2.15	Vol		245	USNM561928	National Museum of Natural History				unknown	This study (Andrew Iwaniuk unpublished data)
Charadriiformes	Alcidae	Ptychoramphus	aleuticus		Ptychoramphus_aleuticus	m	1	2.1	Vol		174.4	USNM491845	National Museum of Natural History				unknown	This study (Andrew Iwaniuk unpublished data)
Charadriiformes	Alcidae	Ptychoramphus	aleuticus		Ptychoramphus_aleuticus	m	1	2.1	Vol		176.1	USNM491846	National Museum of Natural History				unknown	This study (Andrew Iwaniuk unpublished data)
Charadriiformes	Alcidae	Ptychoramphus	aleuticus		Ptychoramphus_aleuticus	m	1	2	Vol		209.5	USNM557610	National Museum of Natural History				unknown	This study (Andrew Iwaniuk unpublished data)
Charadriiformes	Alcidae	Ptychoramphus	aleuticus		Ptychoramphus_aleuticus	m	1	2.3	Vol		182.1	USNM557612	National Museum of Natural History				unknown	This study (Andrew Iwaniuk unpublished data)
Charadriiformes	Alcidae	Synthliboramphus	antiquus		Synthliboramphus_antiquus	f	1	2.25	Vol		255	USNM561916	National Museum of Natural History				unknown	This study (Andrew Iwaniuk unpublished data)
Charadriiformes	Alcidae	Synthliboramphus	antiquus		Synthliboramphus_antiquus	f	1	2.8	Vol		280	USNM561925	National Museum of Natural History				unknown	This study (Andrew Iwaniuk unpublished data)
Charadriiformes	Alcidae	Synthliboramphus	antiquus		Synthliboramphus_antiquus	m	1		Mass	2.079	175.84	HoBR365359	House of Bird Research collection	5-24-2006	Attu Is. Alaska	52.56N 173.14E	Adult	This study (Johannes Erritzøe House of Bird Research collection)
Charadriiformes	Alcidae	Uria	aalge		Uria_aalge	f	1	5.65	Vol		978.7	USNM500076	National Museum of Natural History				unknown	This study (Andrew Iwaniuk unpublished data)
Charadriiformes	Alcidae	Uria	aalge		Uria_aalge	f	1	5.7	Vol		934	USNM500080	National Museum of Natural History				unknown	This study (Andrew Iwaniuk unpublished data)
Charadriiformes	Alcidae	Uria	aalge		Uria_aalge	f	1	5.65	Vol		1003.5	USNM500172	National Museum of Natural History				unknown	This study (Andrew Iwaniuk unpublished data)
Charadriiformes	Alcidae	Uria	aalge		Uria_aalge	f	1		Mass	4.95	934.5	HoBR167123	House of Bird Research collection		Binderup Strand, DK	55.26N 09.36E	Adult	This study (Johannes Erritzøe House of Bird Research collection)
Charadriiformes	Alcidae	Uria	aalge		Uria_aalge	f	1		Mass	5.631	1184	HoBR308946	House of Bird Research collection	3-25-2005	Hirtshals, DK	57.35N 09.58E	Adult	This study (Johannes Erritzøe House of Bird Research collection)
Charadriiformes	Alcidae	Uria	aalge		Uria_aalge	f	1		Mass	4.903	714	HoBR365549	House of Bird Research collection	5-13-2015	Kodiak I. Alaska	57.46N 152.30W	unknown	This study (Johannes Erritzøe House of Bird Research collection)
Charadriiformes	Alcidae	Uria	aalge		Uria_aalge	m	1	5.4	Vol		900	USNM500085	National Museum of Natural History				unknown	This study (Andrew Iwaniuk unpublished data)
Charadriiformes	Alcidae	Uria	aalge		Uria_aalge	m	1	5.6	Vol		931	USNM500090	National Museum of Natural History				unknown	This study (Andrew Iwaniuk unpublished data)
Charadriiformes	Alcidae	Uria	aalge		Uria_aalge	m	1	5.8	Vol		980	USNM500159	National Museum of Natural History				unknown	This study (Andrew Iwaniuk unpublished data)
Charadriiformes	Alcidae	Uria	aalge		Uria_aalge	m	1	5.9	Vol		1063.5	USNM500178	National Museum of Natural History				unknown	This study (Andrew Iwaniuk unpublished data)
Charadriiformes	Alcidae	Uria	aalge		Uria_aalge	m	1		Mass	4.36	633	HoBR171485	House of Bird Research collection	2-23-1986	Barsø, DK	55.07N 09.34E	Adult	This study (Johannes Erritzøe House of Bird Research collection)
Charadriiformes	Alcidae	Uria	aalge		Uria_aalge	m	1		Mass	4.193	586	HoBR314732	House of Bird Research collection	10-7-2002	Rømø, DK	55.09N 08.31E	Adult	This study (Johannes Erritzøe House of Bird Research collection)
Charadriiformes	Alcidae	Uria	aalge		Uria_aalge	m	1		Mass	4.55	630.5	HoBR171414	House of Bird Research collection	12-12-1985	Moltrup, DK	55.16N 09.30E	unknown	This study (Johannes Erritzøe House of Bird Research collection)
Charadriiformes	Alcidae	Uria	aalge		Uria_aalge	m	1		Mass	5.023	1025	HoBR314580	House of Bird Research collection	2-16-2002	Læsø, DK	55.50N 10.36E	unknown	This study (Johannes Erritzøe House of Bird Research collection)
Charadriiformes	Alcidae	Uria	aalge		Uria_aalge	unknown	1		Mass	5.12	1015.5	HoBR167061	House of Bird Research collection		Lillebælt, DK	55.09N 09.48E	unknown	This study (Johannes Erritzøe House of Bird Research collection)
Charadriiformes	Alcidae	Uria	lomvia		Uria_lomvia	f	1	5.2	Vol		985	PMA 86.19.26	Royal Alberta Museum				unknown	This study (Andrew Iwaniuk unpublished data)
Charadriiformes	Alcidae	Uria	lomvia		Uria_lomvia	f	1	5.2	Vol		1000	PMA 86.19.4	Royal Alberta Museum				unknown	This study (Andrew Iwaniuk unpublished data)
Charadriiformes	Alcidae	Uria	lomvia		Uria_lomvia	f	1	4.8	Vol		1136	PMA 88.7.24	Royal Alberta Museum				unknown	This study (Andrew Iwaniuk unpublished data)
Charadriiformes	Alcidae	Uria	lomvia		Uria_lomvia	f	1	5.2	Vol		1055	PMA 88.7.3	Royal Alberta Museum				unknown	This study (Andrew Iwaniuk unpublished data)
Charadriiformes	Alcidae	Uria	lomvia		Uria_lomvia	f	1	5.2	Vol		892	PMA 88.7.38	Royal Alberta Museum				unknown	This study (Andrew Iwaniuk unpublished data)
Charadriiformes	Alcidae	Uria	lomvia		Uria_lomvia	f	1		Mass	5.644	825	HoBR314495	House of Bird Research collection	6-2-2001	Thule, Greenland	76.34N 68.47W	Adult	This study (Johannes Erritzøe House of Bird Research collection)
Charadriiformes	Alcidae	Uria	lomvia		Uria_lomvia	f	1		Mass	4.845	895	HoBR Not registered	House of Bird Research collection	6-2-2001	Thule Greenland	76.34N 68.47W	Adult	This study (Johannes Erritzøe House of Bird Research collection)
Charadriiformes	Alcidae	Uria	lomvia		Uria_lomvia	f	1		Mass	4.98	1250	HoBR235109	House of Bird Research collection		Greenland		Adult	This study (Johannes Erritzøe House of Bird Research collection)
Charadriiformes	Alcidae	Uria	lomvia		Uria_lomvia	m	1	5.3	Vol		1019	PMA 88.7.23	Royal Alberta Museum				unknown	This study (Andrew Iwaniuk unpublished data)
Charadriiformes	Alcidae	Uria	lomvia		Uria_lomvia	m	1	5.4	Vol		946	PMA 88.7.32	Royal Alberta Museum				unknown	This study (Andrew Iwaniuk unpublished data)
Charadriiformes	Alcidae	Uria	lomvia		Uria_lomvia	m	1	6.1	Vol		953	PMA 88.7.33	Royal Alberta Museum				unknown	This study (Andrew Iwaniuk unpublished data)
Charadriiformes	Alcidae	Uria	lomvia		Uria_lomvia	m	1	5.1	Vol		992	PMA 88.7.36	Royal Alberta Museum				unknown	This study (Andrew Iwaniuk unpublished data)
Charadriiformes	Alcidae	Uria	lomvia		Uria_lomvia	m	1	5.5	Vol		924	PMA 88.7.39	Royal Alberta Museum				unknown	This study (Andrew Iwaniuk unpublished data)
Charadriiformes	Alcidae	Uria	lomvia		Uria_lomvia	m	1		Mass	5.066	1011	HoBR Not registered	House of Bird Research collection	1-xx-2005	Sisimiut, Greenland	66.56N 53.40W	unknown	This study (Johannes Erritzøe House of Bird Research collection)
Charadriiformes	Alcidae	Uria	lomvia		Uria_lomvia	m	1		Mass	5.365	868	HoBR314496	House of Bird Research collection	6-2-2001	Thule, Greenland	76.34N 68.47W	Adult	This study (Johannes Erritzøe House of Bird Research collection)
Charadriiformes	Alcidae	Uria	lomvia		Uria_lomvia	m	1		Mass	4.874	800.5	HoBR314498	House of Bird Research collection	6-2-2001	Thule, Greenland	76.34N 68.47W	Adult	This study (Johannes Erritzøe House of Bird Research collection)
Charadriiformes	Alcidae	Uria	lomvia		Uria_lomvia	m	1		Mass	4.964	927	HoBR314499	House of Bird Research collection	6-2-2001	Thule, Greenland	76.34N 68.47W	Adult	This study (Johannes Erritzøe House of Bird Research collection)
Charadriiformes	Burhinidae	Burhinus	bistriatus		Burhinus_bistriatus	m	1	4.8	Vol		610	USNM621089	National Museum of Natural History				unknown	This study (Andrew Iwaniuk unpublished data)
Charadriiformes	Burhinidae	Burhinus	grallarius		Burhinus_grallarius	f	1	4.2	Vol		775	ANWC23049	Australian National Wildlife Collection				unknown	This study (Andrew Iwaniuk unpublished data)
Charadriiformes	Burhinidae	Burhinus	grallarius		Burhinus_grallarius	f	1	4.25	Vol		695	ANWC23050	Australian National Wildlife Collection				unknown	This study (Andrew Iwaniuk unpublished data)
Charadriiformes	Burhinidae	Burhinus	grallarius		Burhinus_grallarius	m	1	4.2	Vol		188.5	AMO44452	Australian Museum				unknown	This study (Andrew Iwaniuk unpublished data)
Charadriiformes	Burhinidae	Burhinus	grallarius		Burhinus_grallarius	m	1	4.6	Vol		730	ANWC23046	Australian National Wildlife Collection				unknown	This study (Andrew Iwaniuk unpublished data)
Charadriiformes	Burhinidae	Burhinus	oedicnemus		Burhinus_oedicnemus	f	1		Mass	2.358	252.751	HoBR286421	House of Bird Research collection	11-21-1997	Blæsbjerg, Bindslev, DK	57.33N 10.12E	unknown	This study (Johannes Erritzøe House of Bird Research collection)
Charadriiformes	Burhinidae	Burhinus	oedicnemus		Burhinus_oedicnemus	m	1		Mass	3.193	376.088	HoBR259419	House of Bird Research collection	4-3-1995	Greece		Adult	This study (Johannes Erritzøe House of Bird Research collection)
Charadriiformes	Burhinidae	Esacus	giganteus		Esacus_giganteus	f	1	5.3	Vol		990	AMO65024	Australian Museum				unknown	This study (Andrew Iwaniuk unpublished data)
Charadriiformes	Burhinidae	Esacus	giganteus		Esacus_giganteus	f	1	5.95	Vol		1030	ANWC23052	Australian National Wildlife Collection				unknown	This study (Andrew Iwaniuk unpublished data)
Charadriiformes	Burhinidae	Esacus	giganteus		Esacus_giganteus	m	1	5.4	Vol		1000	ANWC28837	Australian National Wildlife Collection				unknown	This study (Andrew Iwaniuk unpublished data)
Charadriiformes	Charadriidae	Charadrius	alexandrinus		Charadrius_alexandrinus	f	1	0.88	Vol		38.7	USNM502473	National Museum of Natural History				unknown	This study (Andrew Iwaniuk unpublished data)
Charadriiformes	Charadriidae	Charadrius	alexandrinus		Charadrius_alexandrinus	f	1	0.86	Vol		36	USNM555301	National Museum of Natural History				unknown	This study (Andrew Iwaniuk unpublished data)
Charadriiformes	Charadriidae	Charadrius	alexandrinus		Charadrius_alexandrinus	f	1	0.88	Vol		36	USNM555305	National Museum of Natural History				unknown	This study (Andrew Iwaniuk unpublished data)
Charadriiformes	Charadriidae	Charadrius	alexandrinus		Charadrius_alexandrinus	m	1	0.9	Vol		36	USNM555297	National Museum of Natural History				unknown	This study (Andrew Iwaniuk unpublished data)
Charadriiformes	Charadriidae	Charadrius	alexandrinus		Charadrius_alexandrinus	m	1	0.88	Vol		37	USNM555298	National Museum of Natural History				unknown	This study (Andrew Iwaniuk unpublished data)
Charadriiformes	Charadriidae	Charadrius	alexandrinus		Charadrius_alexandrinus	m	1	0.94	Vol		38	USNM555300	National Museum of Natural History				unknown	This study (Andrew Iwaniuk unpublished data)
Charadriiformes	Charadriidae	Charadrius	alexandrinus		Charadrius_alexandrinus	m	1	0.92	Vol		36	USNM555302	National Museum of Natural History				unknown	This study (Andrew Iwaniuk unpublished data)
Charadriiformes	Charadriidae	Charadrius	alexandrinus		Charadrius_alexandrinus	m	1	0.89	Vol		38	USNM555304	National Museum of Natural History				unknown	This study (Andrew Iwaniuk unpublished data)
Charadriiformes	Charadriidae	Charadrius	alexandrinus		Charadrius_alexandrinus	m	1		Mass	0.893	37.294	HoBR339129	House of Bird Research collection	6-3-2008	Marathon Lake, Greece	38.09N 23.58E	Adult	This study (Johannes Erritzøe House of Bird Research collection)
Charadriiformes	Charadriidae	Charadrius	australis		Charadrius_australis	m	1	1.15	Vol		76	AMO64567	Australian Museum				unknown	This study (Andrew Iwaniuk unpublished data)
Charadriiformes	Charadriidae	Charadrius	australis		Charadrius_australis	m	1	1.15	Vol		86	ANWC48996	Australian National Wildlife Collection				unknown	This study (Andrew Iwaniuk unpublished data)
Charadriiformes	Charadriidae	Charadrius	bicinctus		Charadrius_bicinctus	f	1	1.1	Vol		73	MV B13993	Museum Victoria				unknown	This study (Andrew Iwaniuk unpublished data)
Charadriiformes	Charadriidae	Charadrius	bicinctus		Charadrius_bicinctus	f	1	0.97	Vol		75.5	MV B17826	Museum Victoria				unknown	This study (Andrew Iwaniuk unpublished data)
Charadriiformes	Charadriidae	Charadrius	bicinctus		Charadrius_bicinctus	f	1	1.15	Vol		53.7	MV B20704	Museum Victoria				unknown	This study (Andrew Iwaniuk unpublished data)
Charadriiformes	Charadriidae	Charadrius	bicinctus		Charadrius_bicinctus	f	1	1	Vol		55	MVW12080					unknown	This study (Andrew Iwaniuk unpublished data)
Charadriiformes	Charadriidae	Charadrius	bicinctus		Charadrius_bicinctus	m	1	1.1	Vol		71.6	MV B12884	Museum Victoria				unknown	This study (Andrew Iwaniuk unpublished data)
Charadriiformes	Charadriidae	Charadrius	bicinctus		Charadrius_bicinctus	m	1	1.15	Vol		54.1	MV B19848	Museum Victoria				unknown	This study (Andrew Iwaniuk unpublished data)
Charadriiformes	Charadriidae	Charadrius	bicinctus		Charadrius_bicinctus	m	1	1.2	Vol		57	MV B20577	Museum Victoria				unknown	This study (Andrew Iwaniuk unpublished data)
Charadriiformes	Charadriidae	Charadrius	dubius		Charadrius_dubius	f	1		Mass	0.732	41.522	HoBR338489	House of Bird Research collection	6-18-2006	Hjarup, DK	55.27N 09.22E	Adult	This study (Johannes Erritzøe House of Bird Research collection)
Charadriiformes	Charadriidae	Charadrius	dubius		Charadrius_dubius	m	1		Mass	0.824	39.276	HoBR274055	House of Bird Research collection	5-18-1996	Taulov, Fredericia, DK	55.32N 09.37E	Adult	This study (Johannes Erritzøe House of Bird Research collection)
Charadriiformes	Charadriidae	Charadrius	falklandicus		Charadrius_falklandicus	f	1	1.2	Vol		60.5	USNM489484	National Museum of Natural History				unknown	This study (Andrew Iwaniuk unpublished data)
Charadriiformes	Charadriidae	Charadrius	falklandicus		Charadrius_falklandicus	f	1	1.2	Vol		74.7	USNM490858	National Museum of Natural History				unknown	This study (Andrew Iwaniuk unpublished data)
Charadriiformes	Charadriidae	Charadrius	falklandicus		Charadrius_falklandicus	f	1	1.1	Vol		76.4	USNM490861	National Museum of Natural History				unknown	This study (Andrew Iwaniuk unpublished data)
Charadriiformes	Charadriidae	Charadrius	leschenaultii	leschenaultii	Charadrius_leschenaultii	f	1		Mass	1.27	75.5	HoBR215915	House of Bird Research collection	4-21-1988	Aparri, Luzon	18.22N 121.39E	Adult	This study (Johannes Erritzøe House of Bird Research collection)
Charadriiformes	Charadriidae	Charadrius	leschenaultii	leschenaultii	Charadrius_leschenaultii	f	1		Mass	1.2	81.35	HoBR215916	House of Bird Research collection	4-21-1988	Aparri, Luzon	18.22N 121.39E	Adult	This study (Johannes Erritzøe House of Bird Research collection)
Charadriiformes	Charadriidae	Charadrius	leschenaultii		Charadrius_leschenaultii	f	1	1.2	Vol		65	MV B13277	Museum Victoria				unknown	This study (Andrew Iwaniuk unpublished data)
Charadriiformes	Charadriidae	Charadrius	leschenaultii		Charadrius_leschenaultii	f	1	1.25	Vol		65	MV B13279	Museum Victoria				unknown	This study (Andrew Iwaniuk unpublished data)
Charadriiformes	Charadriidae	Charadrius	leschenaultii		Charadrius_leschenaultii	f	1	1.1	Vol		70	MV B13284	Museum Victoria				unknown	This study (Andrew Iwaniuk unpublished data)
Charadriiformes	Charadriidae	Charadrius	leschenaultii		Charadrius_leschenaultii	f	1	1.4	Vol		70	MV B13779	Museum Victoria				unknown	This study (Andrew Iwaniuk unpublished data)
Charadriiformes	Charadriidae	Charadrius	leschenaultii		Charadrius_leschenaultii	f	1	1.3	Vol		65	MV B13801	Museum Victoria				unknown	This study (Andrew Iwaniuk unpublished data)
Charadriiformes	Charadriidae	Charadrius	leschenaultii		Charadrius_leschenaultii	m	1	1.25	Vol		70	MV B13797	Museum Victoria				unknown	This study (Andrew Iwaniuk unpublished data)
Charadriiformes	Charadriidae	Charadrius	leschenaultii		Charadrius_leschenaultii	m	1	1.4	Vol		70	MV B13899	Museum Victoria				unknown	This study (Andrew Iwaniuk unpublished data)
Charadriiformes	Charadriidae	Charadrius	melodus		Charadrius_melodus	f	1	0.96	Vol		51.3	USNM502474	National Museum of Natural History				unknown	This study (Andrew Iwaniuk unpublished data)
Charadriiformes	Charadriidae	Charadrius	modestus		Charadrius_modestus	f	1	1.15	Vol		70	USNM491010	National Museum of Natural History				unknown	This study (Andrew Iwaniuk unpublished data)
Charadriiformes	Charadriidae	Charadrius	modestus		Charadrius_modestus	m	1	1.35	Vol		85.2	USNM490852	National Museum of Natural History				unknown	This study (Andrew Iwaniuk unpublished data)
Charadriiformes	Charadriidae	Charadrius	modestus		Charadrius_modestus	m	1	1.3	Vol		87.5	USNM490855	National Museum of Natural History				unknown	This study (Andrew Iwaniuk unpublished data)
Charadriiformes	Charadriidae	Charadrius	modestus		Charadrius_modestus	m	1	1.35	Vol		83.1	USNM490857	National Museum of Natural History				unknown	This study (Andrew Iwaniuk unpublished data)
Charadriiformes	Charadriidae	Charadrius	mongolus		Charadrius_mongolus	f	1	1.2	Vol		61.5	AMO60042	Australian Museum				unknown	This study (Andrew Iwaniuk unpublished data)
Charadriiformes	Charadriidae	Charadrius	mongolus		Charadrius_mongolus	f	1	1.2	Vol		67.9	MV B13934	Museum Victoria				unknown	This study (Andrew Iwaniuk unpublished data)
Charadriiformes	Charadriidae	Charadrius	mongolus		Charadrius_mongolus	f	1	1.1	Vol		63.3	MV B13936	Museum Victoria				unknown	This study (Andrew Iwaniuk unpublished data)
Charadriiformes	Charadriidae	Charadrius	mongolus		Charadrius_mongolus	f	1	1.2	Vol		64.6	MV B14072	Museum Victoria				unknown	This study (Andrew Iwaniuk unpublished data)
Charadriiformes	Charadriidae	Charadrius	mongolus		Charadrius_mongolus	f	1	1.2	Vol		68.7	MV B14073	Museum Victoria				unknown	This study (Andrew Iwaniuk unpublished data)
Charadriiformes	Charadriidae	Charadrius	mongolus		Charadrius_mongolus	f	1	1.1	Vol		65.9	MV B14075	Museum Victoria				unknown	This study (Andrew Iwaniuk unpublished data)
Charadriiformes	Charadriidae	Charadrius	mongolus		Charadrius_mongolus	m	1	1.15	Vol		64.8	AMO60040	Australian Museum				unknown	This study (Andrew Iwaniuk unpublished data)
Charadriiformes	Charadriidae	Charadrius	mongolus		Charadrius_mongolus	m	1	1.1	Vol		61	AMO64807	Australian Museum				unknown	This study (Andrew Iwaniuk unpublished data)
Charadriiformes	Charadriidae	Charadrius	mongolus		Charadrius_mongolus	m	1	1.1	Vol		59.5	AMO64808	Australian Museum				unknown	This study (Andrew Iwaniuk unpublished data)
Charadriiformes	Charadriidae	Charadrius	mongolus		Charadrius_mongolus	m	1	1.1	Vol		61	ANWC23125	Australian National Wildlife Collection				unknown	This study (Andrew Iwaniuk unpublished data)
Charadriiformes	Charadriidae	Charadrius	mongolus		Charadrius_mongolus	m	1	1.1	Vol		64.5	MV B14074	Museum Victoria				unknown	This study (Andrew Iwaniuk unpublished data)
Charadriiformes	Charadriidae	Charadrius	pecuarius		Charadrius_pecuarius	m	1	0.85	Vol		31.5	ANWC23117	Australian National Wildlife Collection				unknown	This study (Andrew Iwaniuk unpublished data)
Charadriiformes	Charadriidae	Charadrius	pecuarius		Charadrius_pecuarius	m	1	0.84	Vol		32	USNM501153	National Museum of Natural History				unknown	This study (Andrew Iwaniuk unpublished data)
Charadriiformes	Charadriidae	Charadrius	ruficapillus		Charadrius_ruficapillus	f	1	0.78	Vol		48.8	MV B15674	Museum Victoria				unknown	This study (Andrew Iwaniuk unpublished data)
Charadriiformes	Charadriidae	Charadrius	ruficapillus		Charadrius_ruficapillus	m	1	0.89	Vol		43.5	MV B13992	Museum Victoria				unknown	This study (Andrew Iwaniuk unpublished data)
Charadriiformes	Charadriidae	Charadrius	semipalmatus		Charadrius_semipalmatus	f	1	0.95	Vol		44	USNM489575	National Museum of Natural History				unknown	This study (Andrew Iwaniuk unpublished data)
Charadriiformes	Charadriidae	Charadrius	semipalmatus		Charadrius_semipalmatus	f	1	0.95	Vol		58.4	USNM489715	National Museum of Natural History				unknown	This study (Andrew Iwaniuk unpublished data)
Charadriiformes	Charadriidae	Charadrius	semipalmatus		Charadrius_semipalmatus	f	1	0.65	Vol		40.8	PMA 72.102.41	Royal Alberta Museum				unknown	This study (Andrew Iwaniuk unpublished data)
Charadriiformes	Charadriidae	Charadrius	semipalmatus		Charadrius_semipalmatus	f	1	0.98	Vol		49.3	PMA 84.39.44	Royal Alberta Museum				unknown	This study (Andrew Iwaniuk unpublished data)
Charadriiformes	Charadriidae	Charadrius	semipalmatus		Charadrius_semipalmatus	f	1	0.9	Vol		41.5	PMA 85.21.73	Royal Alberta Museum				unknown	This study (Andrew Iwaniuk unpublished data)
Charadriiformes	Charadriidae	Charadrius	semipalmatus		Charadrius_semipalmatus	f	1		Mass	0.762	27.946	HoBR365604	House of Bird Research collection	5-23-2013	Havy C. Junction, Alaska	62.64N 141.03W	Adult	This study (Johannes Erritzøe House of Bird Research collection)
Charadriiformes	Charadriidae	Charadrius	semipalmatus		Charadrius_semipalmatus	f	1		Mass	0.843	44.279	HoBR365382	House of Bird Research collection	6-21-2009	Eielson Air Force Base, Alaska	64.67N 147.10W	Adult	This study (Johannes Erritzøe House of Bird Research collection)
Charadriiformes	Charadriidae	Charadrius	semipalmatus		Charadrius_semipalmatus	m	1	0.98	Vol		48.2	USNM489594	National Museum of Natural History				unknown	This study (Andrew Iwaniuk unpublished data)
Charadriiformes	Charadriidae	Charadrius	semipalmatus		Charadrius_semipalmatus	m	1	0.945	Vol		41.1	USNM489599	National Museum of Natural History				unknown	This study (Andrew Iwaniuk unpublished data)
Charadriiformes	Charadriidae	Charadrius	semipalmatus		Charadrius_semipalmatus	m	1	0.95	Vol		49.1	USNM489729	National Museum of Natural History				unknown	This study (Andrew Iwaniuk unpublished data)
Charadriiformes	Charadriidae	Charadrius	semipalmatus		Charadrius_semipalmatus	m	1	1.01	Vol		51.5	USNM489731	National Museum of Natural History				unknown	This study (Andrew Iwaniuk unpublished data)
Charadriiformes	Charadriidae	Charadrius	semipalmatus		Charadrius_semipalmatus	m	1	0.89	Vol		43.2	PMA 85.21.14	Royal Alberta Museum				unknown	This study (Andrew Iwaniuk unpublished data)
Charadriiformes	Charadriidae	Charadrius	tricollaris		Charadrius_tricollaris	f	1	0.8	Vol		148	USNM558498	National Museum of Natural History				unknown	This study (Andrew Iwaniuk unpublished data)
Charadriiformes	Charadriidae	Charadrius	vociferus		Charadrius_vociferus	f	1	1.3	Vol		77.8	USNM553645	National Museum of Natural History				unknown	This study (Andrew Iwaniuk unpublished data)
Charadriiformes	Charadriidae	Charadrius	vociferus		Charadrius_vociferus	f	1	1.25	Vol		71	USNM562461	National Museum of Natural History				unknown	This study (Andrew Iwaniuk unpublished data)
Charadriiformes	Charadriidae	Charadrius	vociferus		Charadrius_vociferus	f	1	1.1	Vol		90.6	PMA 79.15.177	Royal Alberta Museum				unknown	This study (Andrew Iwaniuk unpublished data)
Charadriiformes	Charadriidae	Charadrius	vociferus		Charadrius_vociferus	f	1	1.1	Vol		83.1	PMA 83.12.9	Royal Alberta Museum				unknown	This study (Andrew Iwaniuk unpublished data)
Charadriiformes	Charadriidae	Charadrius	vociferus		Charadrius_vociferus	m	1	1.1	Vol		90	PMA 71.93.18	Royal Alberta Museum				unknown	This study (Andrew Iwaniuk unpublished data)
Charadriiformes	Charadriidae	Charadrius	vociferus		Charadrius_vociferus	m	1	1.2	Vol		102	PMA 82.27.119	Royal Alberta Museum				unknown	This study (Andrew Iwaniuk unpublished data)
Charadriiformes	Charadriidae	Charadrius	vociferus		Charadrius_vociferus	m	1	1.25	Vol		91.3	PMA 82.30.25	Royal Alberta Museum				unknown	This study (Andrew Iwaniuk unpublished data)
Charadriiformes	Charadriidae	Charadrius	vociferus		Charadrius_vociferus	m	1	1.1	Vol		93.5	PMA 83.29.109	Royal Alberta Museum				unknown	This study (Andrew Iwaniuk unpublished data)
Charadriiformes	Charadriidae	Charadrius	vociferus		Charadrius_vociferus	m	1	1.05	Vol		63.8	PMA 83.62.116	Royal Alberta Museum				unknown	This study (Andrew Iwaniuk unpublished data)
Charadriiformes	Charadriidae	Charadrius	vociferus		Charadrius_vociferus	m	1	1.15	Vol		53.5	PMA 86.43.2	Royal Alberta Museum				unknown	This study (Andrew Iwaniuk unpublished data)
Charadriiformes	Charadriidae	Charadrius	vociferus		Charadrius_vociferus	m	1	1.05	Vol		79.8	PMA 87.27.42	Royal Alberta Museum				unknown	This study (Andrew Iwaniuk unpublished data)
Charadriiformes	Charadriidae	Charadrius	vociferus		Charadrius_vociferus	m	1	1.15	Vol		90.1	PMA 88.22.28	Royal Alberta Museum				unknown	This study (Andrew Iwaniuk unpublished data)
Charadriiformes	Charadriidae	Charadrius	vociferus		Charadrius_vociferus	m	1	1.2	Vol		92.9	PMA 88.22.30	Royal Alberta Museum				unknown	This study (Andrew Iwaniuk unpublished data)
Charadriiformes	Charadriidae	Charadrius	vociferus		Charadrius_vociferus	unknown	1		Mass	1.22	88						Adult	Hrdlicka A (1905) Brain Weight in Vertebrates
Charadriiformes	Charadriidae	Charadrius	wilsonia		Charadrius_wilsonia	f	1	1	Vol		69	USNM502172	National Museum of Natural History				unknown	This study (Andrew Iwaniuk unpublished data)
Charadriiformes	Charadriidae	Charadrius	wilsonia		Charadrius_wilsonia	m	1	1.05	Vol		62.5	USNM622547	National Museum of Natural History				unknown	This study (Andrew Iwaniuk unpublished data)
Charadriiformes	Charadriidae	Erythrogonys	cinctus		Erythrogonys_cinctus	m	1	1.05	Vol		50	AMO64574	Australian Museum				unknown	This study (Andrew Iwaniuk unpublished data)
Charadriiformes	Charadriidae	Erythrogonys	cinctus		Erythrogonys_cinctus	m	1	1.05	Vol		50	ANWC23125	Australian National Wildlife Collection				unknown	This study (Andrew Iwaniuk unpublished data)
Charadriiformes	Charadriidae	Pluvialis	apricaria		Pluvialis_apricaria	f	1	2.2	Vol		213.5	MV B20279	Museum Victoria				unknown	This study (Andrew Iwaniuk unpublished data)
Charadriiformes	Charadriidae	Pluvialis	apricaria		Pluvialis_apricaria	f	1	2.1	Vol		208.7	MV B20281	Museum Victoria				unknown	This study (Andrew Iwaniuk unpublished data)
Charadriiformes	Charadriidae	Pluvialis	apricaria		Pluvialis_apricaria	f	1		Mass	2.2	193.1	HoBR154294	House of Bird Research collection	9-1-1982	Årupholm, North Jutland, DK		Adult	This study (Johannes Erritzøe House of Bird Research collection)
Charadriiformes	Charadriidae	Pluvialis	apricaria		Pluvialis_apricaria	f	1		Mass	2.28	237.6	HoBR154340	House of Bird Research collection				unknown	This study (Johannes Erritzøe House of Bird Research collection)
Charadriiformes	Charadriidae	Pluvialis	apricaria		Pluvialis_apricaria	m	1	2.3	Vol		226.46	MV B20247	Museum Victoria				unknown	This study (Andrew Iwaniuk unpublished data)
Charadriiformes	Charadriidae	Pluvialis	apricaria		Pluvialis_apricaria	m	1	2.3	Vol		232.6	MV B20253	Museum Victoria				unknown	This study (Andrew Iwaniuk unpublished data)
Charadriiformes	Charadriidae	Pluvialis	apricaria		Pluvialis_apricaria	m	1	2.4	Vol		210	USNM620110	National Museum of Natural History				unknown	This study (Andrew Iwaniuk unpublished data)
Charadriiformes	Charadriidae	Pluvialis	apricaria		Pluvialis_apricaria	m	1	2.2	Vol		190	USNM621332	National Museum of Natural History				unknown	This study (Andrew Iwaniuk unpublished data)
Charadriiformes	Charadriidae	Pluvialis	apricaria		Pluvialis_apricaria	m	1		Mass	2.36	199.2	HoBR154301	House of Bird Research collection				Adult	This study (Johannes Erritzøe House of Bird Research collection)
Charadriiformes	Charadriidae	Pluvialis	dominica		Pluvialis_dominica	f	1	1.8	Vol		132.21	AMO66425	Australian Museum				unknown	This study (Andrew Iwaniuk unpublished data)
Charadriiformes	Charadriidae	Pluvialis	dominica		Pluvialis_dominica	f	1	1.7	Vol		151.1	USNM489658	National Museum of Natural History				unknown	This study (Andrew Iwaniuk unpublished data)
Charadriiformes	Charadriidae	Pluvialis	dominica		Pluvialis_dominica	f	1	1.8	Vol		153.9	USNM489688	National Museum of Natural History				unknown	This study (Andrew Iwaniuk unpublished data)
Charadriiformes	Charadriidae	Pluvialis	dominica		Pluvialis_dominica	f	1	1.85	Vol		180	USNM489734	National Museum of Natural History				unknown	This study (Andrew Iwaniuk unpublished data)
Charadriiformes	Charadriidae	Pluvialis	dominica		Pluvialis_dominica	f	1	1.75	Vol		162.9	PMA 83.46.14	Royal Alberta Museum				unknown	This study (Andrew Iwaniuk unpublished data)
Charadriiformes	Charadriidae	Pluvialis	dominica		Pluvialis_dominica	f	1		Mass	2.13	132.303	HoBR365295	House of Bird Research collection	5-27-2009	Fairbanks, Alaska	64.50N 147.47W	Adult	This study (Johannes Erritzøe House of Bird Research collection)
Charadriiformes	Charadriidae	Pluvialis	dominica		Pluvialis_dominica	f	1		Mass	1.619	121.613	HoBR365296	House of Bird Research collection	5-27-2009	Fairbanks, Alaska	64.50N 147.47W	Adult	This study (Johannes Erritzøe House of Bird Research collection)
Charadriiformes	Charadriidae	Pluvialis	dominica		Pluvialis_dominica	m	1	1.85	Vol		151.6	USNM489577	National Museum of Natural History				unknown	This study (Andrew Iwaniuk unpublished data)
Charadriiformes	Charadriidae	Pluvialis	dominica		Pluvialis_dominica	m	1	1.9	Vol		136	USNM489595	National Museum of Natural History				unknown	This study (Andrew Iwaniuk unpublished data)
Charadriiformes	Charadriidae	Pluvialis	dominica		Pluvialis_dominica	m	1	2	Vol		157.6	USNM489690	National Museum of Natural History				unknown	This study (Andrew Iwaniuk unpublished data)
Charadriiformes	Charadriidae	Pluvialis	dominica		Pluvialis_dominica	m	1	1.8	Vol		140.8	USNM489733	National Museum of Natural History				unknown	This study (Andrew Iwaniuk unpublished data)
Charadriiformes	Charadriidae	Pluvialis	dominica		Pluvialis_dominica	m	1	1.8	Vol		136.7	PMA 83.46.12	Royal Alberta Museum				unknown	This study (Andrew Iwaniuk unpublished data)
Charadriiformes	Charadriidae	Pluvialis	dominica		Pluvialis_dominica	m	1	1.8	Vol		131.4	PMA 83.46.13	Royal Alberta Museum				unknown	This study (Andrew Iwaniuk unpublished data)
Charadriiformes	Charadriidae	Pluvialis	fulva		Pluvialis_fulva	f	1	1.65	Vol		145	MV B20033	Museum Victoria				unknown	This study (Andrew Iwaniuk unpublished data)
Charadriiformes	Charadriidae	Pluvialis	squatarola		Pluvialis_squatarola	f	1	2.6	Vol		217	MV B17898	Museum Victoria				unknown	This study (Andrew Iwaniuk unpublished data)
Charadriiformes	Charadriidae	Pluvialis	squatarola		Pluvialis_squatarola	f	1	2.55	Vol		225	USNM500229	National Museum of Natural History				unknown	This study (Andrew Iwaniuk unpublished data)
Charadriiformes	Charadriidae	Pluvialis	squatarola		Pluvialis_squatarola	f	1		Mass	2.02	239.5	HoBR154341	House of Bird Research collection				unknown	This study (Johannes Erritzøe House of Bird Research collection)
Charadriiformes	Charadriidae	Pluvialis	squatarola		Pluvialis_squatarola	f	1		Mass	2.18	161.4	HoBR166405	House of Bird Research collection				Adult	This study (Johannes Erritzøe House of Bird Research collection)
Charadriiformes	Charadriidae	Pluvialis	squatarola		Pluvialis_squatarola	f	1		Mass	2.32	233.2	HoBR166406	House of Bird Research collection				unknown	This study (Johannes Erritzøe House of Bird Research collection)
Charadriiformes	Charadriidae	Pluvialis	squatarola		Pluvialis_squatarola	m	1	2.6	Vol		181.9	USNM502434	National Museum of Natural History				unknown	This study (Andrew Iwaniuk unpublished data)
Charadriiformes	Charadriidae	Pluvialis	squatarola		Pluvialis_squatarola	m	1	2.7	Vol		402	USNM502630	National Museum of Natural History				unknown	This study (Andrew Iwaniuk unpublished data)
Charadriiformes	Charadriidae	Pluvialis	squatarola		Pluvialis_squatarola	m	1	2.45	Vol		204	USNM553639	National Museum of Natural History				unknown	This study (Andrew Iwaniuk unpublished data)
Charadriiformes	Charadriidae	Pluvialis	squatarola		Pluvialis_squatarola	m	1	2.5	Vol		206	USNM553640	National Museum of Natural History				unknown	This study (Andrew Iwaniuk unpublished data)
Charadriiformes	Charadriidae	Pluvialis	squatarola		Pluvialis_squatarola	m	1		Mass	2.38	280.5	HoBR154368	House of Bird Research collection				unknown	This study (Johannes Erritzøe House of Bird Research collection)
Charadriiformes	Charadriidae	Vanellus	armatus		Vanellus_armatus	f	1	1.9	Vol		156	USNM558486	National Museum of Natural History				unknown	This study (Andrew Iwaniuk unpublished data)
Charadriiformes	Charadriidae	Vanellus	armatus		Vanellus_armatus	f	1	1.9	Vol		148	USNM558487	National Museum of Natural History				unknown	This study (Andrew Iwaniuk unpublished data)
Charadriiformes	Charadriidae	Vanellus	armatus		Vanellus_armatus	f	1	2.1	Vol		152	USNM558488	National Museum of Natural History				unknown	This study (Andrew Iwaniuk unpublished data)
Charadriiformes	Charadriidae	Vanellus	armatus		Vanellus_armatus	f	1	2.05	Vol		167	USNM558490	National Museum of Natural History				unknown	This study (Andrew Iwaniuk unpublished data)
Charadriiformes	Charadriidae	Vanellus	armatus		Vanellus_armatus	f	1		Mass	2.07	63.1	HoBR Not registered	House of Bird Research collection	11-30-1985	captivity		Adult	This study (Johannes Erritzøe House of Bird Research collection)
Charadriiformes	Charadriidae	Vanellus	armatus		Vanellus_armatus	f	1		Mass	2.09	128.9	HoBR Not registered	House of Bird Research collection				Adult	This study (Johannes Erritzøe House of Bird Research collection)
Charadriiformes	Charadriidae	Vanellus	armatus		Vanellus_armatus	m	1	1.9	Vol		176	USNM558485	National Museum of Natural History				unknown	This study (Andrew Iwaniuk unpublished data)
Charadriiformes	Charadriidae	Vanellus	cayanus		Vanellus_cayanus	m	1	1.55	Vol		88.5	USNM632376	National Museum of Natural History				unknown	This study (Andrew Iwaniuk unpublished data)
Charadriiformes	Charadriidae	Vanellus	cayanus		Vanellus_cayanus	m	1	1.7	Vol		89	USNM632377	National Museum of Natural History				unknown	This study (Andrew Iwaniuk unpublished data)
Charadriiformes	Charadriidae	Vanellus	coronatus		Vanellus_coronatus	f	1		Mass	1.55	108.5	HoBR Not registered	House of Bird Research collection		captivity		Adult	This study (Johannes Erritzøe House of Bird Research collection)
Charadriiformes	Charadriidae	Vanellus	coronatus		Vanellus_coronatus	m	1	2.3	Vol		189	USNM558491	National Museum of Natural History				unknown	This study (Andrew Iwaniuk unpublished data)
Charadriiformes	Charadriidae	Vanellus	coronatus		Vanellus_coronatus	m	1	2.2	Vol		191	USNM558492	National Museum of Natural History				unknown	This study (Andrew Iwaniuk unpublished data)
Charadriiformes	Charadriidae	Vanellus	coronatus		Vanellus_coronatus	m	1	2.2	Vol		208	USNM558493	National Museum of Natural History				unknown	This study (Andrew Iwaniuk unpublished data)
Charadriiformes	Charadriidae	Vanellus	miles		Vanellus_miles	f	1	2.95	Vol		353	AMO58528	Australian Museum				unknown	This study (Andrew Iwaniuk unpublished data)
Charadriiformes	Charadriidae	Vanellus	miles		Vanellus_miles	f	1	2.9	Vol		330	AMO62427	Australian Museum				unknown	This study (Andrew Iwaniuk unpublished data)
Charadriiformes	Charadriidae	Vanellus	miles		Vanellus_miles	f	1	2.85	Vol		360	ANWC23098	Australian National Wildlife Collection				unknown	This study (Andrew Iwaniuk unpublished data)
Charadriiformes	Charadriidae	Vanellus	miles		Vanellus_miles	m	1	3.2	Vol		270	AMO59884	Australian Museum				unknown	This study (Andrew Iwaniuk unpublished data)
Charadriiformes	Charadriidae	Vanellus	miles		Vanellus_miles	m	1	3.05	Vol		345	AMO66354	Australian Museum				unknown	This study (Andrew Iwaniuk unpublished data)
Charadriiformes	Charadriidae	Vanellus	miles		Vanellus_miles	m	1	2.75	Vol		350	ANWC23083	Australian National Wildlife Collection				unknown	This study (Andrew Iwaniuk unpublished data)
Charadriiformes	Charadriidae	Vanellus	miles		Vanellus_miles	m	1	2.55	Vol		325	ANWC23084	Australian National Wildlife Collection				unknown	This study (Andrew Iwaniuk unpublished data)
Charadriiformes	Charadriidae	Vanellus	senegallus		Vanellus_senegallus	f	1	2.4	Vol		278	USNM558946	National Museum of Natural History				unknown	This study (Andrew Iwaniuk unpublished data)
Charadriiformes	Charadriidae	Vanellus	senegallus		Vanellus_senegallus	m	1	2.55	Vol		251	USNM558945	National Museum of Natural History				unknown	This study (Andrew Iwaniuk unpublished data)
Charadriiformes	Charadriidae	Vanellus	spinosus		Vanellus_spinosus	m	1		Mass	1.653	201.036	HoBR246180	House of Bird Research collection	6-15-1991	Macedonia, Greece	40.25N 21,00E	Adult	This study (Johannes Erritzøe House of Bird Research collection)
Charadriiformes	Charadriidae	Vanellus	spinosus		Vanellus_spinosus	m	1		Mass	1.707	182.891	HoBR246181	House of Bird Research collection	6-29-1991	Macedonia, Greece	40.25N 21,00E	Adult	This study (Johannes Erritzøe House of Bird Research collection)
Charadriiformes	Charadriidae	Vanellus	tricolor		Vanellus_tricolor	f	1	1.9	Vol		210	ANWC23070	Australian National Wildlife Collection				unknown	This study (Andrew Iwaniuk unpublished data)
Charadriiformes	Charadriidae	Vanellus	tricolor		Vanellus_tricolor	f	1	1.85	Vol		210	ANWC23075	Australian National Wildlife Collection				unknown	This study (Andrew Iwaniuk unpublished data)
Charadriiformes	Charadriidae	Vanellus	tricolor		Vanellus_tricolor	f	1	1.9	Vol		220	ANWC23080	Australian National Wildlife Collection				unknown	This study (Andrew Iwaniuk unpublished data)
Charadriiformes	Charadriidae	Vanellus	tricolor		Vanellus_tricolor	f	1	3.15	Vol		400	ANWC23082	Australian National Wildlife Collection				unknown	This study (Andrew Iwaniuk unpublished data)
Charadriiformes	Charadriidae	Vanellus	tricolor		Vanellus_tricolor	f	1	2.7	Vol		350	ANWC23088	Australian National Wildlife Collection				unknown	This study (Andrew Iwaniuk unpublished data)
Charadriiformes	Charadriidae	Vanellus	tricolor		Vanellus_tricolor	f	1	2.9	Vol		325	ANWC23090	Australian National Wildlife Collection				unknown	This study (Andrew Iwaniuk unpublished data)
Charadriiformes	Charadriidae	Vanellus	tricolor		Vanellus_tricolor	f	1	2.7	Vol		300	ANWC23095	Australian National Wildlife Collection				unknown	This study (Andrew Iwaniuk unpublished data)
Charadriiformes	Charadriidae	Vanellus	tricolor		Vanellus_tricolor	m	1	2.1	Vol		175	ANWC23073	Australian National Wildlife Collection				unknown	This study (Andrew Iwaniuk unpublished data)
Charadriiformes	Charadriidae	Vanellus	tricolor		Vanellus_tricolor	m	1	2	Vol		200	ANWC23074	Australian National Wildlife Collection				unknown	This study (Andrew Iwaniuk unpublished data)
Charadriiformes	Charadriidae	Vanellus	tricolor		Vanellus_tricolor	m	1	2.1	Vol		210	ANWC23076	Australian National Wildlife Collection				unknown	This study (Andrew Iwaniuk unpublished data)
Charadriiformes	Charadriidae	Vanellus	tricolor		Vanellus_tricolor	m	1	2.1	Vol		205	ANWC23077	Australian National Wildlife Collection				unknown	This study (Andrew Iwaniuk unpublished data)
Charadriiformes	Charadriidae	Vanellus	tricolor		Vanellus_tricolor	m	1	2.05	Vol		190	ANWC23078	Australian National Wildlife Collection				unknown	This study (Andrew Iwaniuk unpublished data)
Charadriiformes	Charadriidae	Vanellus	tricolor		Vanellus_tricolor	m	1	2.9	Vol		380	ANWC23089	Australian National Wildlife Collection				unknown	This study (Andrew Iwaniuk unpublished data)
Charadriiformes	Charadriidae	Vanellus	tricolor		Vanellus_tricolor	m	1	3	Vol		380	ANWC23100	Australian National Wildlife Collection				unknown	This study (Andrew Iwaniuk unpublished data)
Charadriiformes	Charadriidae	Vanellus	tricolor		Vanellus_tricolor	m	1	2.5	Vol		290	ANWC23104	Australian National Wildlife Collection				unknown	This study (Andrew Iwaniuk unpublished data)
Charadriiformes	Charadriidae	Vanellus	vanellus		Vanellus_vanellus	f	1		Mass	1.95	187.7	HoBR257573	House of Bird Research collection	5-13-1993	Haderslev, DK	55.16N 09.30E	Adult	This study (Johannes Erritzøe House of Bird Research collection)
Charadriiformes	Charadriidae	Vanellus	vanellus		Vanellus_vanellus	f	1		Mass	2.056	148.836	HoBR290964	House of Bird Research collection	7-xx-1996	Vamdrup, DK	55.25N 09.17E	Adult	This study (Johannes Erritzøe House of Bird Research collection)
Charadriiformes	Charadriidae	Vanellus	vanellus		Vanellus_vanellus	f	1		Mass	2.281	194.686	HoBR353312	House of Bird Research collection	6-13-2011	Vamdrup, DK	55.25N 09.17E	Adult	This study (Johannes Erritzøe House of Bird Research collection)
Charadriiformes	Charadriidae	Vanellus	vanellus		Vanellus_vanellus	f	1		Mass	2.15	179.7	HoBR215447	House of Bird Research collection	7-14-1987	Esbjerg, DK	55.28N 08.27E	Adult	This study (Johannes Erritzøe House of Bird Research collection)
Charadriiformes	Charadriidae	Vanellus	vanellus		Vanellus_vanellus	f	1		Mass	2.081	278.263	HoBR314358	House of Bird Research collection	5-4-2000	Esbjerg, DK	55.28N 08.27E	Adult	This study (Johannes Erritzøe House of Bird Research collection)
Charadriiformes	Charadriidae	Vanellus	vanellus		Vanellus_vanellus	f	1		Mass	2.28	278.6	HoBR171247	House of Bird Research collection	6-12-1985	Kolding, DK	55.29N 09.28E	Adult	This study (Johannes Erritzøe House of Bird Research collection)
Charadriiformes	Charadriidae	Vanellus	vanellus		Vanellus_vanellus	f	1		Mass	2.24	215.6	HoBR166840	House of Bird Research collection				Adult	This study (Johannes Erritzøe House of Bird Research collection)
Charadriiformes	Charadriidae	Vanellus	vanellus		Vanellus_vanellus	f	1		Mass	2.09	188.5	HoBR215626	House of Bird Research collection				Adult	This study (Johannes Erritzøe House of Bird Research collection)
Charadriiformes	Charadriidae	Vanellus	vanellus		Vanellus_vanellus	m	1	2.3	Vol		208	USNM621202	National Museum of Natural History				unknown	This study (Andrew Iwaniuk unpublished data)
Charadriiformes	Charadriidae	Vanellus	vanellus		Vanellus_vanellus	m	1	2	Vol		152.8	USNM621342	National Museum of Natural History				unknown	This study (Andrew Iwaniuk unpublished data)
Charadriiformes	Charadriidae	Vanellus	vanellus		Vanellus_vanellus	m	1		Mass	2.05	261	HoBR235673	House of Bird Research collection	4-26-1991	Toftlund, DK	55.11N 09.04E	Adult	This study (Johannes Erritzøe House of Bird Research collection)
Charadriiformes	Charadriidae	Vanellus	vanellus		Vanellus_vanellus	m	1		Mass	1.95	219.7	HoBR171556	House of Bird Research collection	5-4-1986	Gram, DK	55.17N 09.03E	Adult	This study (Johannes Erritzøe House of Bird Research collection)
Charadriiformes	Charadriidae	Vanellus	vanellus		Vanellus_vanellus	m	1		Mass	2.368	184.445	HoBR353876	House of Bird Research collection	3-21-2013	Jordrup, DK	55.33N 09.19E	Adult	This study (Johannes Erritzøe House of Bird Research collection)
Charadriiformes	Charadriidae	Vanellus	vanellus		Vanellus_vanellus	m	1		Mass	2.023	191.404	HoBR353879	House of Bird Research collection	4-5-2013	Ribe-Toftlund, DK		Adult	This study (Johannes Erritzøe House of Bird Research collection)
Charadriiformes	Chionididae	Chionis	albus		Chionis_albus	m	1	4.2	Vol		600	USNM489489	National Museum of Natural History				unknown	This study (Andrew Iwaniuk unpublished data)
Charadriiformes	Chionididae	Chionis	minor		Chionis_minor	f	1	3.4	Vol		510	MVW2234					unknown	This study (Andrew Iwaniuk unpublished data)
Charadriiformes	Glareolidae	Stiltia	isabella		Stiltia_isabella	f	1	1.02	Vol		66.8	ANWC18539	Australian National Wildlife Collection				unknown	This study (Andrew Iwaniuk unpublished data)
Charadriiformes	Glareolidae	Stiltia	isabella		Stiltia_isabella	f	1	1.05	Vol		62	ANWC23054	Australian National Wildlife Collection				unknown	This study (Andrew Iwaniuk unpublished data)
Charadriiformes	Glareolidae	Stiltia	isabella		Stiltia_isabella	f	1	1.03	Vol		55	ANWC23055	Australian National Wildlife Collection				unknown	This study (Andrew Iwaniuk unpublished data)
Charadriiformes	Glareolidae	Stiltia	isabella		Stiltia_isabella	f	1	1.02	Vol		60	ANWC23059	Australian National Wildlife Collection				unknown	This study (Andrew Iwaniuk unpublished data)
Charadriiformes	Glareolidae	Stiltia	isabella		Stiltia_isabella	f	1	1.05	Vol		60	ANWC23060	Australian National Wildlife Collection				unknown	This study (Andrew Iwaniuk unpublished data)
Charadriiformes	Glareolidae	Stiltia	isabella		Stiltia_isabella	m	1	1.03	Vol		62	MV B12878	Museum Victoria				unknown	This study (Andrew Iwaniuk unpublished data)
Charadriiformes	Glareolidae	Stiltia	isabella		Stiltia_isabella	m	1	1.04	Vol		72	MV B12880	Museum Victoria				unknown	This study (Andrew Iwaniuk unpublished data)
Charadriiformes	Glareolidae	Stiltia	isabella		Stiltia_isabella	m	1	1.025	Vol		66.5	MV B12881	Museum Victoria				unknown	This study (Andrew Iwaniuk unpublished data)
Charadriiformes	Haematopodidae	Haematopus	ater		Haematopus_ater	f	1	5.1	Vol		640	USNM490221	National Museum of Natural History				unknown	This study (Andrew Iwaniuk unpublished data)
Charadriiformes	Haematopodidae	Haematopus	ater		Haematopus_ater	f	1	5.2	Vol		906.9	USNM490997	National Museum of Natural History				unknown	This study (Andrew Iwaniuk unpublished data)
Charadriiformes	Haematopodidae	Haematopus	ater		Haematopus_ater	f	1	5	Vol		870	USNM490998	National Museum of Natural History				unknown	This study (Andrew Iwaniuk unpublished data)
Charadriiformes	Haematopodidae	Haematopus	ater		Haematopus_ater	m	1	5.2	Vol		845.7	USNM490999	National Museum of Natural History				unknown	This study (Andrew Iwaniuk unpublished data)
Charadriiformes	Haematopodidae	Haematopus	bachmani		Haematopus_bachmani	f	1	4.35	Vol		550.9	USNM557587	National Museum of Natural History				unknown	This study (Andrew Iwaniuk unpublished data)
Charadriiformes	Haematopodidae	Haematopus	bachmani		Haematopus_bachmani	m	1	4.6	Vol		567	USNM498418	National Museum of Natural History				unknown	This study (Andrew Iwaniuk unpublished data)
Charadriiformes	Haematopodidae	Haematopus	bachmani		Haematopus_bachmani	m	1	4.6	Vol		485.4	USNM557586	National Museum of Natural History				unknown	This study (Andrew Iwaniuk unpublished data)
Charadriiformes	Haematopodidae	Haematopus	bachmani		Haematopus_bachmani	m	1	4.5	Vol		583.7	USNM557587	National Museum of Natural History				unknown	This study (Andrew Iwaniuk unpublished data)
Charadriiformes	Haematopodidae	Haematopus	leucopodus		Haematopus_leucopodus	f	1	4.6	Vol		661.7	USNM490996	National Museum of Natural History				unknown	This study (Andrew Iwaniuk unpublished data)
Charadriiformes	Haematopodidae	Haematopus	leucopodus		Haematopus_leucopodus	m	1	4.5	Vol		644.3	USNM490993	National Museum of Natural History				unknown	This study (Andrew Iwaniuk unpublished data)
Charadriiformes	Haematopodidae	Haematopus	leucopodus		Haematopus_leucopodus	m	1	4.6	Vol		635.4	USNM490994	National Museum of Natural History				unknown	This study (Andrew Iwaniuk unpublished data)
Charadriiformes	Haematopodidae	Haematopus	leucopodus		Haematopus_leucopodus	m	1	4.5	Vol		651.5	USNM490995	National Museum of Natural History				unknown	This study (Andrew Iwaniuk unpublished data)
Charadriiformes	Haematopodidae	Haematopus	leucopodus		Haematopus_leucopodus	m	1	4.4	Vol		693.4	USNM490998	National Museum of Natural History				unknown	This study (Andrew Iwaniuk unpublished data)
Charadriiformes	Haematopodidae	Haematopus	longirostris		Haematopus_longirostris	m	1	4.3	Vol		588	ANWC23210	Australian National Wildlife Collection				unknown	This study (Andrew Iwaniuk unpublished data)
Charadriiformes	Haematopodidae	Haematopus	ostralegus	ostralegus	Haematopus_ostralegus	m	1		Mass	3.62	475.907	HoBR353955	House of Bird Research collection	7-10-2012			Adult	This study (Johannes Erritzøe House of Bird Research collection)
Charadriiformes	Haematopodidae	Haematopus	ostralegus	ostralegus	Haematopus_ostralegus	m	1		Mass	4.203	505	HoBR353956	House of Bird Research collection	6-26-2012			Adult	This study (Johannes Erritzøe House of Bird Research collection)
Charadriiformes	Haematopodidae	Haematopus	ostralegus		Haematopus_ostralegus	f	1	4.5	Vol		599.1	USNM502174	National Museum of Natural History				unknown	This study (Andrew Iwaniuk unpublished data)
Charadriiformes	Haematopodidae	Haematopus	ostralegus		Haematopus_ostralegus	f	1		Mass	4.064	532	HoBR346315	House of Bird Research collection	7-6-2007			Adult	This study (Johannes Erritzøe House of Bird Research collection)
Charadriiformes	Haematopodidae	Haematopus	ostralegus		Haematopus_ostralegus	f	1		Mass	4.022	531.2	HoBR273846	House of Bird Research collection	7-2-1995			Adult	This study (Johannes Erritzøe House of Bird Research collection)
Charadriiformes	Haematopodidae	Haematopus	ostralegus		Haematopus_ostralegus	f	1		Mass	3.546	348.953	HoBR338312	House of Bird Research collection	4-5-2007			Adult	This study (Johannes Erritzøe House of Bird Research collection)
Charadriiformes	Haematopodidae	Haematopus	ostralegus		Haematopus_ostralegus	m	1	4.2	Vol		429.8	USNM502620	National Museum of Natural History				unknown	This study (Andrew Iwaniuk unpublished data)
Charadriiformes	Haematopodidae	Haematopus	ostralegus		Haematopus_ostralegus	m	1		Mass	3.67	426.2	HoBR154370	House of Bird Research collection				Adult	This study (Johannes Erritzøe House of Bird Research collection)
Charadriiformes	Jacanidae	Actophilornis	africanus		Actophilornis_africanus	m	1		Mass	1.35	88	HoBR Not registered	House of Bird Research collection		captivity		Adult	This study (Johannes Erritzøe House of Bird Research collection)
Charadriiformes	Jacanidae	Jacana	jacana		Jacana_jacana	f	1		Mass	1.146	99.683	HoBR354055	House of Bird Research collection		captivity		Adult	This study (Johannes Erritzøe House of Bird Research collection)
Charadriiformes	Jacanidae	Jacana	spinosa		Jacana_spinosa	f	1	1.5	Vol		149	USNM554280	National Museum of Natural History				unknown	This study (Andrew Iwaniuk unpublished data)
Charadriiformes	Jacanidae	Jacana	spinosa		Jacana_spinosa	f	1	1.43	Vol		140	USNM554282	National Museum of Natural History				unknown	This study (Andrew Iwaniuk unpublished data)
Charadriiformes	Jacanidae	Jacana	spinosa		Jacana_spinosa	m	1	1.3	Vol		94	USNM554277	National Museum of Natural History				unknown	This study (Andrew Iwaniuk unpublished data)
Charadriiformes	Jacanidae	Jacana	spinosa		Jacana_spinosa	m	1	1.3	Vol		91	USNM554278	National Museum of Natural History				unknown	This study (Andrew Iwaniuk unpublished data)
Charadriiformes	Jacanidae	Jacana	spinosa		Jacana_spinosa	m	1	1.3	Vol		83	USNM554281	National Museum of Natural History				unknown	This study (Andrew Iwaniuk unpublished data)
Charadriiformes	Jacanidae	Jacana	spinosa		Jacana_spinosa	m	1	1.4	Vol		91	USNM554283	National Museum of Natural History				unknown	This study (Andrew Iwaniuk unpublished data)
Charadriiformes	Jacanidae	Jacana	spinosa		Jacana_spinosa	m	1	1.35	Vol		98	USNM554284	National Museum of Natural History				unknown	This study (Andrew Iwaniuk unpublished data)
Charadriiformes	Laridae	Larus	argentatus	argentatus	Larus_argentatus	f	1		Mass	6.077	522	HoBR Not registered	House of Bird Research collection	1-10-2012	Årø, DK	55.16N 09.44E	Adult	This study (Johannes Erritzøe House of Bird Research collection)
Charadriiformes	Laridae	Larus	argentatus	argentatus	Larus_argentatus	unknown	1		Mass	6.87	1180	HoBR Not registered	House of Bird Research collection				unknown	This study (Johannes Erritzøe House of Bird Research collection)
Charadriiformes	Laridae	Larus	argentatus		Larus_argentatus	f	2		Mass	5.08	535	CQ44F, CQ10F			Key West, Florida, USA		unknown	Crile G and Quiring DP (1940) Ohio J Sci 40:219-259.
Charadriiformes	Laridae	Larus	argentatus		Larus_argentatus	f	1	6.25	Vol		710	USNM502392	National Museum of Natural History				unknown	This study (Andrew Iwaniuk unpublished data)
Charadriiformes	Laridae	Larus	argentatus		Larus_argentatus	f	1	6.8	Vol		994	USNM502393	National Museum of Natural History				unknown	This study (Andrew Iwaniuk unpublished data)
Charadriiformes	Laridae	Larus	argentatus		Larus_argentatus	m	1	7.55	Vol		1180	USNM553830	National Museum of Natural History				unknown	This study (Andrew Iwaniuk unpublished data)
Charadriiformes	Laridae	Larus	argentatus		Larus_argentatus	unknown	1		Mass	7.35	748						Adult	Hrdlicka A (1905) Brain Weight in Vertebrates
Charadriiformes	Laridae	Larus	argentatus		Larus_argentatus	unknown	1		Mass	7.02	1145						Adult	Hrdlicka A (1905) Brain Weight in Vertebrates
Charadriiformes	Laridae	Larus	atricilla		Larus_atricilla	f	1	3.1	Vol		312.8	USNM502178	National Museum of Natural History				unknown	This study (Andrew Iwaniuk unpublished data)
Charadriiformes	Laridae	Larus	atricilla		Larus_atricilla	m	1	3.2	Vol		332	USNM502179	National Museum of Natural History				unknown	This study (Andrew Iwaniuk unpublished data)
Charadriiformes	Laridae	Larus	atricilla		Larus_atricilla	m	1	3.2	Vol		350	USNM622522	National Museum of Natural History				unknown	This study (Andrew Iwaniuk unpublished data)
Charadriiformes	Laridae	Larus	cachinnans	michahellis	Larus_cachinnans	m	1		Mass	5.705	1190	HoBR339258	House of Bird Research collection	3-10-2009	Falconera T. Greece		Adult	This study (Johannes Erritzøe House of Bird Research collection)
Charadriiformes	Laridae	Larus	cachinnans		Larus_cachinnans	f	1		Mass	6.202	780	HoBR Not registered	House of Bird Research collection	12-6-2007	Rødby Havn, DK	54,41N 11.27E	Adult	This study (Johannes Erritzøe House of Bird Research collection)
Charadriiformes	Laridae	Larus	cachinnans		Larus_cachinnans	m	1		Mass	6.547	795	HoBR353266	House of Bird Research collection	4-xx-2010	Udbjerg, Tønder, DK	54.57N 08.50E	Adult	This study (Johannes Erritzøe House of Bird Research collection)
Charadriiformes	Laridae	Larus	californicus		Larus_californicus	f	1	4.7	Vol		620	USNM621113	National Museum of Natural History				unknown	This study (Andrew Iwaniuk unpublished data)
Charadriiformes	Laridae	Larus	californicus		Larus_californicus	f	1	5	Vol		585	USNM621114	National Museum of Natural History				unknown	This study (Andrew Iwaniuk unpublished data)
Charadriiformes	Laridae	Larus	californicus		Larus_californicus	f	1	4.8	Vol		677	USNM621115	National Museum of Natural History				unknown	This study (Andrew Iwaniuk unpublished data)
Charadriiformes	Laridae	Larus	californicus		Larus_californicus	f	1	5	Vol		687	USNM621119	National Museum of Natural History				unknown	This study (Andrew Iwaniuk unpublished data)
Charadriiformes	Laridae	Larus	californicus		Larus_californicus	f	1	5.2	Vol		675	USNM621121	National Museum of Natural History				unknown	This study (Andrew Iwaniuk unpublished data)
Charadriiformes	Laridae	Larus	californicus		Larus_californicus	m	1	5.4	Vol		694	USNM621109	National Museum of Natural History				unknown	This study (Andrew Iwaniuk unpublished data)
Charadriiformes	Laridae	Larus	californicus		Larus_californicus	m	1	5.1	Vol		691	USNM621112	National Museum of Natural History				unknown	This study (Andrew Iwaniuk unpublished data)
Charadriiformes	Laridae	Larus	californicus		Larus_californicus	m	1	4.9	Vol		694	USNM621116	National Museum of Natural History				unknown	This study (Andrew Iwaniuk unpublished data)
Charadriiformes	Laridae	Larus	californicus		Larus_californicus	m	1	5.5	Vol		830	USNM621120	National Museum of Natural History				unknown	This study (Andrew Iwaniuk unpublished data)
Charadriiformes	Laridae	Larus	californicus		Larus_californicus	m	1	5.1	Vol		780	USNM621123	National Museum of Natural History				unknown	This study (Andrew Iwaniuk unpublished data)
Charadriiformes	Laridae	Larus	canus	brachyrhynchus	Larus_canus	m	1		Mass	3.767	412	HoBR365655	House of Bird Research collection	6-7-2014	near Anchorage, Alaska	61.12N 149.52W	Adult	This study (Johannes Erritzøe House of Bird Research collection)
Charadriiformes	Laridae	Larus	canus	canus	Larus_canus	f	1		Mass	4.019	422	HoBR299660	House of Bird Research collection	2-22-1999	Esbjerg, DK	55.28N 08.27E	Adult	This study (Johannes Erritzøe House of Bird Research collection)
Charadriiformes	Laridae	Larus	canus	canus	Larus_canus	f	1		Mass	4.044	279.724	HoBR338018	House of Bird Research collection	10-22-2005	Tuse Næs, DK	55.46N 11.42E	Adult	This study (Johannes Erritzøe House of Bird Research collection)
Charadriiformes	Laridae	Larus	canus	canus	Larus_canus	f	1		Mass	4.32	278.2	HoBR Not registered	House of Bird Research collection				Adult	This study (Johannes Erritzøe House of Bird Research collection)
Charadriiformes	Laridae	Larus	canus	canus	Larus_canus	f	1		Mass	3.84	335.7	HoBR Not registered	House of Bird Research collection				Adult	This study (Johannes Erritzøe House of Bird Research collection)
Charadriiformes	Laridae	Larus	canus	canus	Larus_canus	m	1		Mass	4.561	420	HoBR346152	House of Bird Research collection	6-25-2008	Taps, DK	55.24N 09.34E	Adult	This study (Johannes Erritzøe House of Bird Research collection)
Charadriiformes	Laridae	Larus	canus	canus	Larus_canus	m	1		Mass	4.489	404.101	HoBR354133	House of Bird Research collection	3-31-2013	Blokhus, DK	57.17N 09.35E	Adult	This study (Johannes Erritzøe House of Bird Research collection)
Charadriiformes	Laridae	Larus	canus	canus	Larus_canus	m	1		Mass	4.1	470.5	HoBR Not registered	House of Bird Research collection				Adult	This study (Johannes Erritzøe House of Bird Research collection)
Charadriiformes	Laridae	Larus	canus		Larus_canus	f	1	4	Vol		380	USNM502551	National Museum of Natural History				unknown	This study (Andrew Iwaniuk unpublished data)
Charadriiformes	Laridae	Larus	canus		Larus_canus	f	1	3.8	Vol		428.3	USNM620283	National Museum of Natural History				unknown	This study (Andrew Iwaniuk unpublished data)
Charadriiformes	Laridae	Larus	canus		Larus_canus	m	1	4.6	Vol		360	USNM553296	National Museum of Natural History				unknown	This study (Andrew Iwaniuk unpublished data)
Charadriiformes	Laridae	Larus	delawarensis		Larus_delawarensis	f	1		Mass	8.72	720	CQ53F			Key West, Florida, USA		unknown	Crile G and Quiring DP (1940) Ohio J Sci 40:219-259.
Charadriiformes	Laridae	Larus	delawarensis		Larus_delawarensis	f	1	4.25	Vol		650	USNM560633	National Museum of Natural History				unknown	This study (Andrew Iwaniuk unpublished data)
Charadriiformes	Laridae	Larus	delawarensis		Larus_delawarensis	m	1	4.75	Vol		417.6	USNM501672	National Museum of Natural History				unknown	This study (Andrew Iwaniuk unpublished data)
Charadriiformes	Laridae	Larus	delawarensis		Larus_delawarensis	m	1	5	Vol		434	USNM501673	National Museum of Natural History				unknown	This study (Andrew Iwaniuk unpublished data)
Charadriiformes	Laridae	Larus	dominicanus		Larus_dominicanus	f	1	5.6	Vol		1015	MV B19900	Museum Victoria				unknown	This study (Andrew Iwaniuk unpublished data)
Charadriiformes	Laridae	Larus	dominicanus		Larus_dominicanus	f	1	6	Vol		1035.4	USNM491012	National Museum of Natural History				unknown	This study (Andrew Iwaniuk unpublished data)
Charadriiformes	Laridae	Larus	dominicanus		Larus_dominicanus	m	1	6.65	Vol		907.5	USNM491837	National Museum of Natural History				unknown	This study (Andrew Iwaniuk unpublished data)
Charadriiformes	Laridae	Larus	dominicanus		Larus_dominicanus	m	1	6	Vol		975	USNM558507	National Museum of Natural History				unknown	This study (Andrew Iwaniuk unpublished data)
Charadriiformes	Laridae	Larus	dominicanus		Larus_dominicanus	m	1	6.85	Vol		850	USNM558508	National Museum of Natural History				unknown	This study (Andrew Iwaniuk unpublished data)
Charadriiformes	Laridae	Larus	fuscus	fuscus	Larus_fuscus	m	1		Mass	6.209	545	HoBR Not registered	House of Bird Research collection	7-18-2009	Christiansø, DK	55.19N 15.12E	Adult	This study (Johannes Erritzøe House of Bird Research collection)
Charadriiformes	Laridae	Larus	fuscus	intermedius	Larus_fuscus	f	1		Mass	5.064	555	HoBR Not registered	House of Bird Research collection	6-28-2012	Hirsholmene, DK	57.29N 10.37E	Adult	This study (Johannes Erritzøe House of Bird Research collection)
Charadriiformes	Laridae	Larus	fuscus	intermedius	Larus_fuscus	m	1		Mass	5.388	818	HoBR Not registered	House of Bird Research collection	6-28-2012	Hirsholmene, DK	57.29N 10.37E	Adult	This study (Johannes Erritzøe House of Bird Research collection)
Charadriiformes	Laridae	Larus	fuscus		Larus_fuscus	f	1	5.2	Vol		615	USNM631713	National Museum of Natural History				unknown	This study (Andrew Iwaniuk unpublished data)
Charadriiformes	Laridae	Larus	fuscus		Larus_fuscus	f	1	5.8	Vol		855	USNM631722	National Museum of Natural History				unknown	This study (Andrew Iwaniuk unpublished data)
Charadriiformes	Laridae	Larus	fuscus		Larus_fuscus	f	1	5.6	Vol		649	USNM631725	National Museum of Natural History				unknown	This study (Andrew Iwaniuk unpublished data)
Charadriiformes	Laridae	Larus	fuscus		Larus_fuscus	f	1	5.5	Vol		753	USNM631728	National Museum of Natural History				unknown	This study (Andrew Iwaniuk unpublished data)
Charadriiformes	Laridae	Larus	fuscus		Larus_fuscus	f	1	5.6	Vol		809	USNM631736	National Museum of Natural History				unknown	This study (Andrew Iwaniuk unpublished data)
Charadriiformes	Laridae	Larus	fuscus		Larus_fuscus	m	1	6.2	Vol		821	USNM631726	National Museum of Natural History				unknown	This study (Andrew Iwaniuk unpublished data)
Charadriiformes	Laridae	Larus	fuscus		Larus_fuscus	m	1	6.3	Vol		1038	USNM631731	National Museum of Natural History				unknown	This study (Andrew Iwaniuk unpublished data)
Charadriiformes	Laridae	Larus	fuscus		Larus_fuscus	m	1	6.5	Vol		830	USNM631734	National Museum of Natural History				unknown	This study (Andrew Iwaniuk unpublished data)
Charadriiformes	Laridae	Larus	fuscus		Larus_fuscus	m	1	5.9	Vol		964	USNM631739	National Museum of Natural History				unknown	This study (Andrew Iwaniuk unpublished data)
Charadriiformes	Laridae	Larus	fuscus		Larus_fuscus	m	1	6.2	Vol		910	USNM631740	National Museum of Natural History				unknown	This study (Andrew Iwaniuk unpublished data)
Charadriiformes	Laridae	Larus	glaucescens		Larus_glaucescens	f	1	7.25	Vol		1500	USNM561223	National Museum of Natural History				unknown	This study (Andrew Iwaniuk unpublished data)
Charadriiformes	Laridae	Larus	glaucescens		Larus_glaucescens	f	1	7.75	Vol		1450	USNM561229	National Museum of Natural History				unknown	This study (Andrew Iwaniuk unpublished data)
Charadriiformes	Laridae	Larus	glaucescens		Larus_glaucescens	f	1	7.35	Vol		1250	USNM561231	National Museum of Natural History				unknown	This study (Andrew Iwaniuk unpublished data)
Charadriiformes	Laridae	Larus	glaucescens		Larus_glaucescens	f	1	7.4	Vol		1050	USNM561233	National Museum of Natural History				unknown	This study (Andrew Iwaniuk unpublished data)
Charadriiformes	Laridae	Larus	glaucescens		Larus_glaucescens	f	1	8.35	Vol		1100	USNM561235	National Museum of Natural History				unknown	This study (Andrew Iwaniuk unpublished data)
Charadriiformes	Laridae	Larus	glaucescens		Larus_glaucescens	f	1	7.35	Vol		1250	USNM561236	National Museum of Natural History				unknown	This study (Andrew Iwaniuk unpublished data)
Charadriiformes	Laridae	Larus	glaucescens		Larus_glaucescens	f	1	7.15	Vol		1250	USNM561241	National Museum of Natural History				unknown	This study (Andrew Iwaniuk unpublished data)
Charadriiformes	Laridae	Larus	glaucescens		Larus_glaucescens	m	1	7.8	Vol		1525	USNM561220	National Museum of Natural History				unknown	This study (Andrew Iwaniuk unpublished data)
Charadriiformes	Laridae	Larus	glaucescens		Larus_glaucescens	m	1	8.2	Vol		1700	USNM561225	National Museum of Natural History				unknown	This study (Andrew Iwaniuk unpublished data)
Charadriiformes	Laridae	Larus	glaucescens		Larus_glaucescens	m	1	7.9	Vol		1650	USNM561230	National Museum of Natural History				unknown	This study (Andrew Iwaniuk unpublished data)
Charadriiformes	Laridae	Larus	glaucescens		Larus_glaucescens	m	1	8.3	Vol		1450	USNM561232	National Museum of Natural History				unknown	This study (Andrew Iwaniuk unpublished data)
Charadriiformes	Laridae	Larus	glaucescens		Larus_glaucescens	m	1	7.1	Vol		1650	USNM561234	National Museum of Natural History				unknown	This study (Andrew Iwaniuk unpublished data)
Charadriiformes	Laridae	Larus	glaucescens		Larus_glaucescens	m	1	7.8	Vol		1450	USNM561237	National Museum of Natural History				unknown	This study (Andrew Iwaniuk unpublished data)
Charadriiformes	Laridae	Larus	glaucescens		Larus_glaucescens	m	1	7.6	Vol		1450	USNM561240	National Museum of Natural History				unknown	This study (Andrew Iwaniuk unpublished data)
Charadriiformes	Laridae	Larus	hartlaubii		Larus_hartlaubii	f	1	3.05	Vol		325	USNM558516	National Museum of Natural History				unknown	This study (Andrew Iwaniuk unpublished data)
Charadriiformes	Laridae	Larus	hartlaubii		Larus_hartlaubii	f	1	3	Vol		233	USNM558517	National Museum of Natural History				unknown	This study (Andrew Iwaniuk unpublished data)
Charadriiformes	Laridae	Larus	hartlaubii		Larus_hartlaubii	f	1	2.9	Vol		176	USNM558518	National Museum of Natural History				unknown	This study (Andrew Iwaniuk unpublished data)
Charadriiformes	Laridae	Larus	hartlaubii		Larus_hartlaubii	f	1	2.95	Vol		234	USNM558519	National Museum of Natural History				unknown	This study (Andrew Iwaniuk unpublished data)
Charadriiformes	Laridae	Larus	hartlaubii		Larus_hartlaubii	f	1	3	Vol		271	USNM558524	National Museum of Natural History				unknown	This study (Andrew Iwaniuk unpublished data)
Charadriiformes	Laridae	Larus	hartlaubii		Larus_hartlaubii	m	1	3.2	Vol		286	USNM558512	National Museum of Natural History				unknown	This study (Andrew Iwaniuk unpublished data)
Charadriiformes	Laridae	Larus	hartlaubii		Larus_hartlaubii	m	1	3.1	Vol		302	USNM558513	National Museum of Natural History				unknown	This study (Andrew Iwaniuk unpublished data)
Charadriiformes	Laridae	Larus	hartlaubii		Larus_hartlaubii	m	1	3.3	Vol		296	USNM558514	National Museum of Natural History				unknown	This study (Andrew Iwaniuk unpublished data)
Charadriiformes	Laridae	Larus	hartlaubii		Larus_hartlaubii	m	1	3	Vol		317	USNM558515	National Museum of Natural History				unknown	This study (Andrew Iwaniuk unpublished data)
Charadriiformes	Laridae	Larus	hartlaubii		Larus_hartlaubii	m	1	3.2	Vol		275	USNM558525	National Museum of Natural History				unknown	This study (Andrew Iwaniuk unpublished data)
Charadriiformes	Laridae	Larus	heermanni		Larus_heermanni	f	1	3.9	Vol		483.6	USNM557573	National Museum of Natural History				unknown	This study (Andrew Iwaniuk unpublished data)
Charadriiformes	Laridae	Larus	heermanni		Larus_heermanni	f	1	3.7	Vol		471.6	USNM557574	National Museum of Natural History				unknown	This study (Andrew Iwaniuk unpublished data)
Charadriiformes	Laridae	Larus	heermanni		Larus_heermanni	f	1	3.6	Vol		377.5	USNM557575	National Museum of Natural History				unknown	This study (Andrew Iwaniuk unpublished data)
Charadriiformes	Laridae	Larus	heermanni		Larus_heermanni	f	1	3.8	Vol		413.8	USNM557951	National Museum of Natural History				unknown	This study (Andrew Iwaniuk unpublished data)
Charadriiformes	Laridae	Larus	hyperboreus		Larus_hyperboreus	f	1	7.3	Vol		1223.3	USNM430289	National Museum of Natural History				unknown	This study (Andrew Iwaniuk unpublished data)
Charadriiformes	Laridae	Larus	hyperboreus		Larus_hyperboreus	f	1	7	Vol		1176	USNM430293	National Museum of Natural History				unknown	This study (Andrew Iwaniuk unpublished data)
Charadriiformes	Laridae	Larus	hyperboreus		Larus_hyperboreus	f	1	7.8	Vol		1426.5	USNM491957	National Museum of Natural History				unknown	This study (Andrew Iwaniuk unpublished data)
Charadriiformes	Laridae	Larus	hyperboreus		Larus_hyperboreus	m	1	8	Vol		1470	USNM491635	National Museum of Natural History				unknown	This study (Andrew Iwaniuk unpublished data)
Charadriiformes	Laridae	Larus	hyperboreus		Larus_hyperboreus	m	1	7	Vol		1333	USNM491949	National Museum of Natural History				unknown	This study (Andrew Iwaniuk unpublished data)
Charadriiformes	Laridae	Larus	hyperboreus		Larus_hyperboreus	m	1	8.2	Vol		1736	USNM499943	National Museum of Natural History				unknown	This study (Andrew Iwaniuk unpublished data)
Charadriiformes	Laridae	Larus	maculipennis		Larus_maculipennis	m	1	3.3	Vol		310	USNM614624	National Museum of Natural History				unknown	This study (Andrew Iwaniuk unpublished data)
Charadriiformes	Laridae	Larus	maculipennis		Larus_maculipennis	m	1	3.3	Vol		300	USNM614625	National Museum of Natural History				unknown	This study (Andrew Iwaniuk unpublished data)
Charadriiformes	Laridae	Larus	marinus		Larus_marinus	f	1		Mass	6.227	1060	HoBR Not registered	House of Bird Research collection	3-10-2010	Gedser, DK	54,35N 11.56E	Adult	This study (Johannes Erritzøe House of Bird Research collection)
Charadriiformes	Laridae	Larus	marinus		Larus_marinus	f	1		Mass	7.452	1540	HoBR Not registered	House of Bird Research collection	5-20-2013	Hirtsholmene, DK	57.29N 10.37E	Adult	This study (Johannes Erritzøe House of Bird Research collection)
Charadriiformes	Laridae	Larus	marinus		Larus_marinus	f	1		Mass	6.12	1710	HoBR Not registered	House of Bird Research collection				Adult	This study (Johannes Erritzøe House of Bird Research collection)
Charadriiformes	Laridae	Larus	marinus		Larus_marinus	m	1		Mass	7.461	1500	HoBR329004	House of Bird Research collection	7-9-2005	Sandersvig, DK	55.19N 09.38E	Adult	This study (Johannes Erritzøe House of Bird Research collection)
Charadriiformes	Laridae	Larus	marinus		Larus_marinus	m	1		Mass	7.695	1960	HoBR Not registered	House of Bird Research collection	7-1-2011	Nordre Rønner, DK	57.25N 10.50E	Adult	This study (Johannes Erritzøe House of Bird Research collection)
Charadriiformes	Laridae	Larus	marinus		Larus_marinus	m	1		Mass	7.762	1620	HoBR Not registered	House of Bird Research collection	5-20-2013	Hirsholmene, DK	57.29N 10.37E	Adult	This study (Johannes Erritzøe House of Bird Research collection)
Charadriiformes	Laridae	Larus	minutus		Larus_minutus	f	1	1.7	Vol		110	USNM502550	National Museum of Natural History				unknown	This study (Andrew Iwaniuk unpublished data)
Charadriiformes	Laridae	Larus	minutus		Larus_minutus	f	1	1.7	Vol		129	USNM555158	National Museum of Natural History				unknown	This study (Andrew Iwaniuk unpublished data)
Charadriiformes	Laridae	Larus	minutus		Larus_minutus	f	1		Mass	1.414	80.731	HoBR339036	House of Bird Research collection	2-23-2008	Marathon Lake, Greece	38.09N 23.58E	Adult	This study (Johannes Erritzøe House of Bird Research collection)
Charadriiformes	Laridae	Larus	novaehollandiae		Larus_novaehollandiae	f	1	3.1	Vol		255	AMO66352	Australian Museum				unknown	This study (Andrew Iwaniuk unpublished data)
Charadriiformes	Laridae	Larus	novaehollandiae		Larus_novaehollandiae	m	1	2.9	Vol		325	MV B11413	Museum Victoria				unknown	This study (Andrew Iwaniuk unpublished data)
Charadriiformes	Laridae	Larus	novaehollandiae		Larus_novaehollandiae	m	1	2.9	Vol		332.4	MV B16059	Museum Victoria				unknown	This study (Andrew Iwaniuk unpublished data)
Charadriiformes	Laridae	Larus	philadelphia		Larus_philadelphia	f	1	2.2	Vol		167.5	USNM502479	National Museum of Natural History				unknown	This study (Andrew Iwaniuk unpublished data)
Charadriiformes	Laridae	Larus	philadelphia		Larus_philadelphia	m	1		Mass	2.49	205	CQ25			Churchill, Canada		unknown	Crile G and Quiring DP (1940) Ohio J Sci 40:219-259.
Charadriiformes	Laridae	Larus	philadelphia		Larus_philadelphia	m	1	2.4	Vol		300	USNM560635	National Museum of Natural History				unknown	This study (Andrew Iwaniuk unpublished data)
Charadriiformes	Laridae	Larus	pipixcan		Larus_pipixcan	f	1	2.3	Vol		272	USNM622197	National Museum of Natural History				unknown	This study (Andrew Iwaniuk unpublished data)
Charadriiformes	Laridae	Larus	pipixcan		Larus_pipixcan	m	1	2.7	Vol		420	USNM622199	National Museum of Natural History				unknown	This study (Andrew Iwaniuk unpublished data)
Charadriiformes	Laridae	Larus	pipixcan		Larus_pipixcan	m	1	2.8	Vol		246	USNM622200	National Museum of Natural History				unknown	This study (Andrew Iwaniuk unpublished data)
Charadriiformes	Laridae	Larus	ridibundus		Larus_ridibundus	f	1	2.9	Vol		260	USNM556298	National Museum of Natural History				unknown	This study (Andrew Iwaniuk unpublished data)
Charadriiformes	Laridae	Larus	ridibundus		Larus_ridibundus	f	1	3	Vol		325	USNM610491	National Museum of Natural History				unknown	This study (Andrew Iwaniuk unpublished data)
Charadriiformes	Laridae	Larus	ridibundus		Larus_ridibundus	f	1	2.8	Vol		166	USNM623135	National Museum of Natural History				unknown	This study (Andrew Iwaniuk unpublished data)
Charadriiformes	Laridae	Larus	ridibundus		Larus_ridibundus	f	1		Mass	2.258	188.45	HoBR299748	House of Bird Research collection	1-1-1999	Nykøbing F. DK	54.46N 11.53E	Adult	This study (Johannes Erritzøe House of Bird Research collection)
Charadriiformes	Laridae	Larus	ridibundus		Larus_ridibundus	f	1		Mass	2.625	192.002	HoBR314463	House of Bird Research collection	12-8-2000	Nykøbing F. DK	54.46N 11.53E	Adult	This study (Johannes Erritzøe House of Bird Research collection)
Charadriiformes	Laridae	Larus	ridibundus		Larus_ridibundus	f	1		Mass	2.595	173.351	HoBR314464	House of Bird Research collection	12-31-1999	Nykøbing F. DK	54.46N 11.53E	Adult	This study (Johannes Erritzøe House of Bird Research collection)
Charadriiformes	Laridae	Larus	ridibundus		Larus_ridibundus	f	1		Mass	2.953	188.052	HoBR353290	House of Bird Research collection	1-31-2010	Nykøbing F., DK	54.46N 11.53E	Adult	This study (Johannes Erritzøe House of Bird Research collection)
Charadriiformes	Laridae	Larus	ridibundus		Larus_ridibundus	f	1		Mass	2.579	191.597	HoBR329016	House of Bird Research collection	8-6-2005	Ødis, DK	55.25N 09.23E	Adult	This study (Johannes Erritzøe House of Bird Research collection)
Charadriiformes	Laridae	Larus	ridibundus		Larus_ridibundus	f	1		Mass	2.835	232	HoBR299836	House of Bird Research collection	6-14-1999	Esbjerg, DK	55.28N 08.27E	Adult	This study (Johannes Erritzøe House of Bird Research collection)
Charadriiformes	Laridae	Larus	ridibundus		Larus_ridibundus	f	1		Mass	2.942	299.877	HoBR345963	House of Bird Research collection	9-4-2008	Roskilde, DK	55.39N 12.05E	Adult	This study (Johannes Erritzøe House of Bird Research collection)
Charadriiformes	Laridae	Larus	ridibundus		Larus_ridibundus	f	1		Mass	2.553	227.114	HoBR353832	House of Bird Research collection	6-3-2009	Kastrup, DK	55.39N 12.39E	Adult	This study (Johannes Erritzøe House of Bird Research collection)
Charadriiformes	Laridae	Larus	ridibundus		Larus_ridibundus	f	1		Mass	3.02	228	HoBR Not registered	House of Bird Research collection				Adult	This study (Johannes Erritzøe House of Bird Research collection)
Charadriiformes	Laridae	Larus	ridibundus		Larus_ridibundus	f	1		Mass	2.98	276.5	HoBR Not registered	House of Bird Research collection				Adult	This study (Johannes Erritzøe House of Bird Research collection)
Charadriiformes	Laridae	Larus	ridibundus		Larus_ridibundus	f	1		Mass	2.64	290.5	HoBR Not registered	House of Bird Research collection				Adult	This study (Johannes Erritzøe House of Bird Research collection)
Charadriiformes	Laridae	Larus	ridibundus		Larus_ridibundus	f	1		Mass	3.25	302.5	HoBR Not registered	House of Bird Research collection				Adult	This study (Johannes Erritzøe House of Bird Research collection)
Charadriiformes	Laridae	Larus	ridibundus		Larus_ridibundus	f	1		Mass	2.5	320.6	HoBR Not registered	House of Bird Research collection				Adult	This study (Johannes Erritzøe House of Bird Research collection)
Charadriiformes	Laridae	Larus	ridibundus		Larus_ridibundus	m	1	3	Vol		240	USNM502547	National Museum of Natural History				unknown	This study (Andrew Iwaniuk unpublished data)
Charadriiformes	Laridae	Larus	ridibundus		Larus_ridibundus	m	1	2.9	Vol		210	USNM556296	National Museum of Natural History				unknown	This study (Andrew Iwaniuk unpublished data)
Charadriiformes	Laridae	Larus	ridibundus		Larus_ridibundus	m	1	3.2	Vol		290	USNM556297	National Museum of Natural History				unknown	This study (Andrew Iwaniuk unpublished data)
Charadriiformes	Laridae	Larus	ridibundus		Larus_ridibundus	m	1	3.3	Vol		305	USNM610492	National Museum of Natural History				unknown	This study (Andrew Iwaniuk unpublished data)
[truncated: 8,177 more rows]
